# Supplementary material for: Catalyzing Singlet Fission by Transition Metals: Second versus Third Row Effects
Source: PubMed Central journal article supplement — Precis Chem. 2023 Oct 25;1(9):555–64. doi: 10.1021/prechem.3c00082 (PMC10685717; doi:10.1021/prechem.3c00082), 2023-10-25
Supplement: pc3c00082_si_001.pdf [file pc3c00082_si_001.pdf]

Supporting information

## “Catalyzing Singlet Fission by Transition Metals: Second versus Third Row Effects”

Yuxuan Hou,<sup>a,‡</sup> Ilias Papadopoulos,<sup>b,‡,†</sup> Yifan Bo,<sup>b</sup> Anna-Sophie Wollny,<sup>b</sup> Michael J. Ferguson,<sup>a</sup> Lukas A. Mai,<sup>b</sup> Rik R. Tykwinski,<sup>a,\*</sup> and Dirk M. Guldi<sup>b,\*</sup>

<sup>a</sup>Department of Chemistry, University of Alberta, 11227 Saskatchewan Drive, Edmonton, Alberta, Canada T6G 2G2.

Correspondence to: rik.tykwinski@ualberta.ca

<sup>b</sup>Department of Chemistry and Pharmacy & Interdisciplinary Center for Molecular Materials (ICMM), Friedrich-Alexander-University Erlangen-Nuremberg, Egerlandstraße 3, 91058 Erlangen, Germany.

Correspondence to: dirk.guldi@fau.de

(‡ These authors contributed equally)

<sup>†</sup>Present address: Department of Applied Chemistry, Graduate School of Engineering, Center for Molecular Systems (CMS), Kyushu University, 744 Moto-oka, Nishi-ku, Fukuoka 819-0395, Japan.

### Table of Contents

|                                 |     |
|---------------------------------|-----|
| Synthesis and Experimental data | S2  |
| Photophysical Characterization  | S29 |
| Supplementary References        | S64 |

## **Synthesis and Experimental Data**

**Hazards.** No unexpected or unusually high safety hazards were encountered during the course of this research.

Reagents were purchased reagent grade from commercial suppliers and used without further purification. Dry tetrahydrofuran (THF), CH<sub>2</sub>Cl<sub>2</sub>, and toluene (Tol) were obtained from a commercial solvent purification system (LC Technology Solutions INC). MgSO<sub>4</sub> was used as the drying reagent after aqueous work-up. <sup>1</sup>H and <sup>13</sup>C NMR spectra were recorded on an Agilent/Varian DD2 MR two-channel 400 MHz spectrometer (<sup>1</sup>H: 400 MHz), an Agilent/Varian Inova four-channel 500 MHz spectrometer (<sup>1</sup>H: 498 MHz), an Agilent VNMRS four-channel, dual receiver 700 MHz spectrometer (<sup>13</sup>C: 176 MHz), or an Agilent/Varian VNMRS two-channel 500 MHz spectrometer equipped with a <sup>13</sup>C/<sup>1</sup>H dual cold probe (<sup>1</sup>H: 498 MHz, <sup>13</sup>C: 126 MHz). NMR spectra were recorded at ambient probe temperature and referenced to the residual solvent signal (<sup>1</sup>H: CDCl<sub>3</sub>: 7.26 ppm, <sup>13</sup>C: CDCl<sub>3</sub>: 77.06 ppm). The coupling constants of protons in <sup>1</sup>H spectra have been reported as pseudo first-order when possible, even though they can be higher-order (ABC, ABX, AA'BB') spin systems; coupling constants are reported as observed. Routine, steady-state UV-vis measurements were carried out on a Cary-400 spectrophotometer at room temperature. High resolution mass spectra were obtained from an Agilent Technologies 6220 oaTOF instrument (ESI) or a Bruker 9.4T Apex-Qe FTICR instrument (MALDI). IR spectra were recorded on a Thermo Nicolet 8700 FTIR spectrometer and continuum FTIR microscope as films. Differential scanning calorimetry (DSC) measurements were made on a Mettler Toledo DSC or Perkin Elmer Pyris 1 DSC. All DSC measurements were carried out under a flow of nitrogen with a heating rate of 10 °C/min. Melting points were measured with 6406-K Thomas-Hoover melting point apparatus with periscopic thermometer reader. Thin layer chromatography (TLC) analyses were carried out on TLC glass plates from Merck KGaA and visualized via UV-light (254/364 nm). Column chromatography used SiliaFlash® P60 (SiliCycle). Size exclusion column chromatography was performed using Bio-Beads™ SX3 Support (Bio-Rad). Preparative GPC was carried out on a Shimadzu recycling GPC system equipped with a LC-20AR pump, SPD-M20A UV detector and a set of PSS SDV (20 × 300 mm) columns in chloroform as eluent at a flow rate of 6.25 mL/min. **L<sub>pc</sub>**, **L<sub>ref</sub>**,<sup>1</sup> Pt(PhCN)<sub>2</sub>Cl<sub>2</sub>,<sup>2</sup> and Pd(PhCN)<sub>2</sub>Cl<sub>2</sub><sup>3</sup> were synthesized as previously reported.

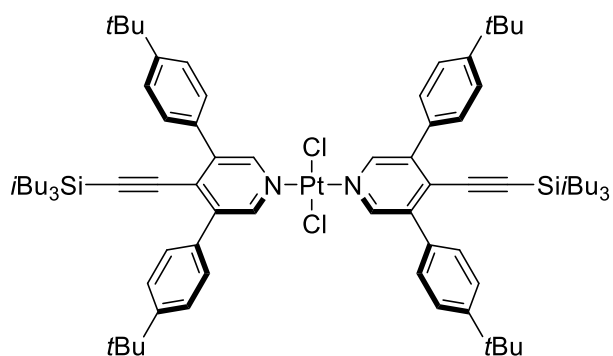

**Compound Pt(L<sub>ref</sub>)<sub>2</sub>Cl<sub>2</sub>.** A mixture of L<sub>ref</sub> (25 mg, 0.044 mmol) and Pt(PhCN)<sub>2</sub>Cl<sub>2</sub> (10 mg, 0.021 mmol) in dry Tol (10 mL) was stirred at 80 °C for 16 h under an atmosphere of argon. The reaction mixture was cooled to rt, and the solvent was then removed under reduced

pressure. The residue was purified by column chromatography (silica gel, CH<sub>2</sub>Cl<sub>2</sub>/hexanes 1:4). Solvent was removed, and the residue was dissolved in CH<sub>2</sub>Cl<sub>2</sub> (2 mL) followed by the addition of MeOH (15 mL). The resulting suspension was filtered, and the residue was washed with MeOH (3 × 2 mL), affording Pt(L<sub>ref</sub>)<sub>2</sub>Cl<sub>2</sub> as a pale yellow crystal (28 mg, 93%). Mp 276 °C (decomp). *R*<sub>f</sub> = 0.66 (EtOAc/hexanes 1:6). UV-vis (CH<sub>2</sub>Cl<sub>2</sub>) λ<sub>max</sub> (ε) 265 (60700), 323 nm (36700). IR (CH<sub>2</sub>Cl<sub>2</sub>, cast) 3089 (w), 3032 (w), 2954 (s), 2927 (m), 2902 (m), 2867 (m), 2155 (m), 1595 (w), 1462 (m) cm<sup>-1</sup>. <sup>1</sup>H NMR (500 MHz, CDCl<sub>3</sub>) δ 8.78 (s, 4H), 7.53 (d, *J* = 8.5 Hz, 8H), 7.45 (d, *J* = 8.5 Hz, 8H), 1.58 (nonet, *J* = 6.6 Hz, 6H), 1.37 (s, 36H), 0.76 (d, *J* = 6.5 Hz, 36H), 0.46 (d, *J* = 7.0 Hz, 12H). <sup>13</sup>C NMR (125 MHz, CDCl<sub>3</sub>) δ 151.7, 151.4, 140.7, 132.5, 130.4, 129.3, 125.3, 110.4, 101.4, 34.7, 31.4, 26.2, 24.8, 24.3. ESI HRMS calcd for C<sub>78</sub>H<sub>110</sub><sup>35</sup>Cl<sub>2</sub>N<sub>2</sub>Na<sup>195</sup>PtSi<sub>2</sub> ([M + Na]<sup>+</sup>) 1418.7125, found 1418.7151. DSC: Decomposition, 283 °C (onset), 285 °C (peak).

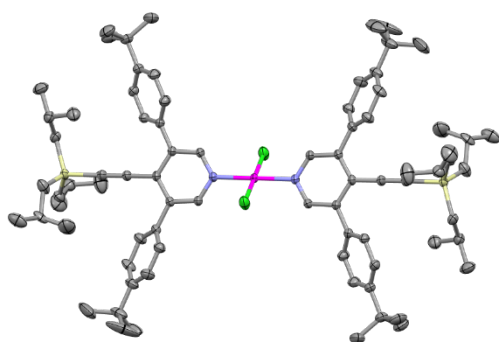

A crystal of Pt(L<sub>ref</sub>)<sub>2</sub>Cl<sub>2</sub> suitable for crystallographic analysis has been grown at rt by slow evaporation of a CH<sub>2</sub>Cl<sub>2</sub> solution layered with MeOH. X-ray data for Pt(L<sub>ref</sub>)<sub>2</sub>Cl<sub>2</sub> (C<sub>78</sub>H<sub>110</sub>Cl<sub>2</sub>N<sub>2</sub>PtSi<sub>2</sub>), *F*<sub>w</sub> = 1397.84; crystal dimensions 0.29 × 0.23 × 0.21 mm, monoclinic crystal system; space group *C2/c* (No. 15); *a*

= 23.7356(18) Å, *b* = 13.9543(10) Å, *c* = 24.4208(18) Å; β = 111.9341(10)°; *V* = 7503.0(10) Å<sup>3</sup>; *Z* = 4; ρ<sub>calcd</sub> = 1.237 g/cm<sup>3</sup>; 2θ<sub>max</sub> = 66.84°; μ = 2.014 mm<sup>-1</sup>; *T* = 173 K; total data collected = 145582; *R*<sub>1</sub> = 0.0216 [11655 observed reflections with *F*<sub>o</sub><sup>2</sup> ≥ 2σ(*F*<sub>o</sub><sup>2</sup>)]; ω*R*<sub>2</sub> = 0.0566 for 14311 data, 426 variables, and 22 restraints; largest difference, peak and hole = 0.740 and -0.765 e Å<sup>-3</sup>. The C39–C40A and C39–C40B distances were restrained to be approximately the same by use of the *SHELXL SADI*

instruction. Additionally, the anisotropic displacement parameters of the atoms within the disordered isobutyl group were restrained by the rigid-bond restraint **RIGU**. CCDC 2288684.

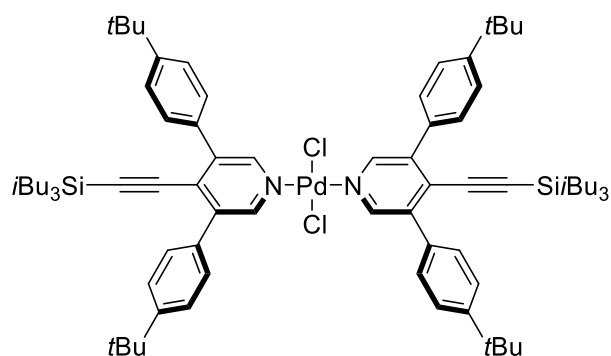

**Compound Pd(L<sub>ref</sub>)<sub>2</sub>Cl<sub>2</sub>.** A mixture of **L<sub>ref</sub>** (30 mg, 0.052 mmol) and Pd(PhCN)<sub>2</sub>Cl<sub>2</sub> (10 mg, 0.026 mmol) in dry CH<sub>2</sub>Cl<sub>2</sub> (5 mL) was stirred at rt for 15 h under an atmosphere of argon. The solvent was removed under reduced pressure and the residue was purified by column chromatography (silica gel, CH<sub>2</sub>Cl<sub>2</sub>/hexanes 1:1). Solvent was removed, and the residue was dissolved in CH<sub>2</sub>Cl<sub>2</sub> (2 mL) followed by the addition of MeOH (15 mL). The resulting suspension was filtered, and the residue was washed with MeOH (3 × 2 mL), affording **Pd(L<sub>ref</sub>)<sub>2</sub>Cl<sub>2</sub>** as a pale yellow crystal (31 mg, 91%). Mp 280 °C (decomp). *R<sub>f</sub>* = 0.27 (CH<sub>2</sub>Cl<sub>2</sub>/hexanes 1:2). UV-vis (CH<sub>2</sub>Cl<sub>2</sub>) λ<sub>max</sub> (ε) 266 (72400), 307 nm (sh, 26900). IR (CH<sub>2</sub>Cl<sub>2</sub>, cast) 3086 (w), 3032 (w), 2954 (s), 2902 (m), 2867 (m), 2158 (m), 1593 (m), 1463 (m) cm<sup>-1</sup>. <sup>1</sup>H NMR (500 MHz, CDCl<sub>3</sub>) δ 8.70 (s, 4H), 7.52 (d, *J* = 8.4 Hz, 8H), 7.44 (d, *J* = 8.4 Hz, 8H), 1.57 (nonet, *J* = 6.7 Hz, 6H), 1.37 (s, 36H), 0.76 (d, *J* = 6.5 Hz, 36H), 0.45 (d, *J* = 6.9 Hz, 12H). <sup>13</sup>C NMR (125 MHz, CDCl<sub>3</sub>) δ 151.8, 151.1, 140.6, 132.6, 130.7, 129.3, 125.3, 110.3, 101.4, 34.8, 31.4, 26.2, 24.8, 24.4. ESI HRMS calcd for C<sub>78</sub>H<sub>110</sub><sup>35</sup>Cl<sub>2</sub>N<sub>2</sub>Na<sup>106</sup>PdSi<sub>2</sub> ([M + Na]<sup>+</sup>) 1329.6512, found 1329.6529. DSC: Decomposition, 300 °C (onset), 300 °C (peak).

A crystal of **Pd(L<sub>ref</sub>)<sub>2</sub>Cl<sub>2</sub>** suitable for crystallographic analysis has been grown at rt by slow evaporation of a CH<sub>2</sub>Cl<sub>2</sub> solution layered with MeOH. X-ray data for **Pd(L<sub>ref</sub>)<sub>2</sub>Cl<sub>2</sub>** (C<sub>78</sub>H<sub>110</sub>Cl<sub>2</sub>N<sub>2</sub>PdSi<sub>2</sub>), *F<sub>w</sub>* = 1309.15; crystal dimensions 0.39 × 0.21 × 0.14 mm, monoclinic crystal system; space group *C2/c* (No. 15); *a* = 23.7115(11) Å, *b* = 13.9570(6) Å, *c* = 24.3980(11) Å; β = 111.7864(6)°; *V* = 7497.6(6) Å<sup>3</sup>; *Z* = 4; ρ<sub>calcd</sub> = 1.160 g/cm<sup>3</sup>; 2θ<sub>max</sub> =

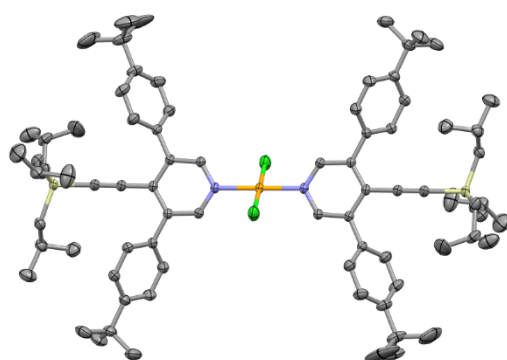

24.3980(11) Å; β = 111.7864(6)°; *V* = 7497.6(6) Å<sup>3</sup>; *Z* = 4; ρ<sub>calcd</sub> = 1.160 g/cm<sup>3</sup>; 2θ<sub>max</sub> =



63.18°;  $\mu = 0.392 \text{ mm}^{-1}$ ;  $T = 173 \text{ K}$ ; total data collected = 137336;  $R_1 = 0.0310$  [10516 observed reflections with  $F_o^2 \geq 2\sigma(F_o^2)$ ];  $\omega R_2 = 0.0878$  for 12572 data, 426 variables, and 1 restraint; largest difference, peak and hole = 0.455 and  $-0.364 \text{ e } \text{\AA}^{-3}$ . The C39–C40A and C39–C40B distances were restrained to be approximately the same by use of the *SHELXL SADI* instruction. CCDC: 2288685.

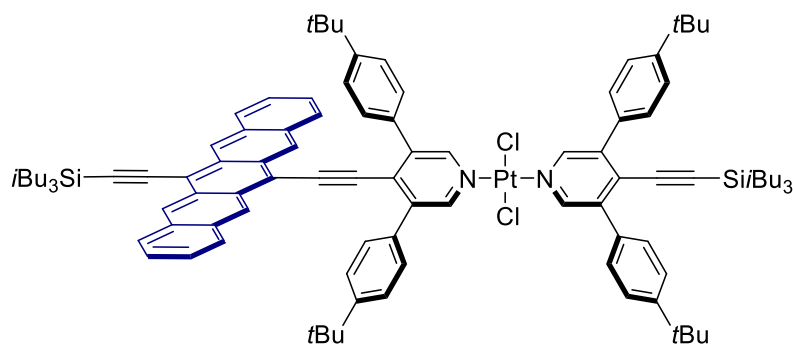

### Compound **Pt(L<sub>pc</sub>)(L<sub>ref</sub>)Cl<sub>2</sub>**.

A solution of Pt(PhCN)<sub>2</sub>Cl<sub>2</sub> (31 mg, 0.066 mmol) in dry Tol (2 mL) was stirred at 110 °C followed by adding a solution of L<sub>ref</sub> (25 mg, 0.044 mmol) in dry Tol (7

mL) dropwise over 5 min. This reaction mixture was stirred at 110 °C for 20 min under an atmosphere of argon. The reaction mixture was cooled to rt, and the solvent was then removed under reduced pressure. Purification by column chromatography (silica gel, EtOAc/hexanes 1:4) afforded **Pt(L<sub>ref</sub>)(PhCN)Cl<sub>2</sub>** as a pale yellow solid (40 mg, 97%). A solution of **Pt(L<sub>ref</sub>)(PhCN)Cl<sub>2</sub>** (40 mg, 0.043 mmol) in dry Tol (3 mL) was stirred at 110 °C followed by adding a solution of L<sub>pc</sub> (34 mg, 0.039 mmol) in dry Tol (10 mL) dropwise over 5 min. The reaction mixture was stirred at 110 °C for 14 h under an atmosphere of argon. The flask was wrapped in aluminum foil during the reaction to limit light exposure. The reaction mixture was cooled to rt, and the solvent was then removed under reduced pressure. The residue was purified by column chromatography (silica gel, EtOAc/hexanes 1:50) followed by size exclusion column chromatography (bio-beads SX3 support, Tol). Solvent was removed, and the residue was dissolved in CH<sub>2</sub>Cl<sub>2</sub> (2 mL) followed by the addition of MeOH (20 mL). The resulting suspension was filtered, and the residue was washed with MeOH (3 × 2 mL), affording **Pt(L<sub>pc</sub>)(L<sub>ref</sub>)Cl<sub>2</sub>** as a dark blue crystal (39 mg, 60%, 58% over 2 steps). Mp 270 °C (decomp).  $R_f = 0.59$  (EtOAc/hexanes 1:6). UV-vis (CH<sub>2</sub>Cl<sub>2</sub>)  $\lambda_{\text{max}}$  ( $\epsilon$ ) 271 (85400), 306 (sh, 104000), 316 (265000), 344 (23400), 391 (sh, 14800), 406 (17000), 440 (660), 580 (sh, 5890), 626 (15800), 677 nm (27200). IR (CH<sub>2</sub>Cl<sub>2</sub>, cast) 3089 (w), 3051 (w), 2954 (s), 2902 (m), 2867 (m), 2175 (w), 2100 (w), 1592 (w), 1462 (m) cm<sup>-1</sup>. <sup>1</sup>H NMR (500 MHz, CDCl<sub>3</sub>)  $\delta$  9.18 (s, 2H), 8.97 (s, 2H), 8.85 (s, 2H), 8.35 (s, 2H), 7.91–7.85 (m,

6H), 7.59–7.55 (m, 4H), 7.53–7.45 (m, 10H), 7.41–7.32 (m, 4H), 2.18 (nonet,  $J = 6.6$  Hz, 3H), 1.59 (nonet,  $J = 6.6$  Hz, 3H), 1.38 (s, 18H), 1.18 (s, 18H), 1.18 (d,  $J = 6.6$  Hz, 18H), 0.95 (d,  $J = 7.0$  Hz, 6H), 0.78 (d,  $J = 6.6$  Hz, 18H), 0.47 (d,  $J = 7.0$  Hz, 6H).  $^{13}\text{C}$  NMR (125 MHz,  $\text{CDCl}_3$ ) 152.5, 151.9, 151.8, 151.5, 140.8, 140.1, 133.0, 132.6, 132.4, 132.3, 130.43, 130.40, 129.5, 129.3, 129.2, 128.4, 126.2, 126.1, 125.9, 125.7, 125.3, 120.3, 116.4, 111.1, 110.5, 104.5, 102.0, 101.5, 100.3, 34.77, 34.76, 31.4, 31.1, 26.6, 26.2, 25.5, 25.4, 24.9, 24.4 (three signals coincident or not observed). MALDI HRMS (DCTB) calcd for  $\text{C}_{102}\text{H}_{122}^{35}\text{Cl}_2\text{N}_2^{195}\text{PtSi}_2$  ( $\text{M}^+$ ) 1695.1866, found 1696.8143. DSC: Decomposition, 251 °C (onset), 268 °C (peak).

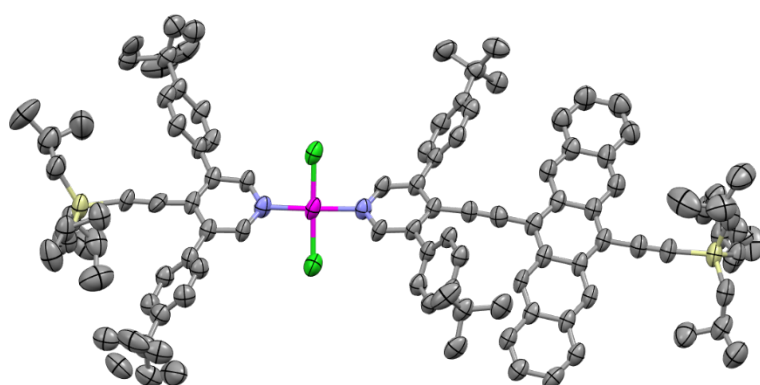

A crystal of **Pt(L<sub>pc</sub>)(L<sub>ref</sub>)Cl<sub>2</sub>** suitable for crystallographic analysis has been grown at rt by slow evaporation of a  $\text{CH}_2\text{Cl}_2$  solution layered with MeOH. X-ray data for **Pt(L<sub>pc</sub>)(L<sub>ref</sub>)Cl<sub>2</sub>·0.5CH<sub>2</sub>Cl<sub>2</sub>** ( $\text{C}_{102.50}\text{H}_{123}\text{Cl}_3\text{N}_2\text{PtSi}_2$ ),  $F_w =$

1740.64; crystal dimensions 0.22 × 0.10 × 0.02 mm, triclinic crystal system; space group  $P\bar{1}$  (No. 2);  $a = 13.7003(4)$  Å,  $b = 16.5954(6)$  Å,  $c = 21.1156(9)$  Å;  $\alpha = 91.722(3)^\circ$ ,  $\beta = 97.447(3)^\circ$ ,  $\gamma = 99.825(2)^\circ$ ;  $V = 4683.9(3)$  Å<sup>3</sup>;  $Z = 2$ ;  $\rho_{\text{calcd}} = 1.234$  g/cm<sup>3</sup>;  $2\theta_{\text{max}} = 143.39^\circ$ ;  $\mu = 4.172$  mm<sup>-1</sup>;  $T = 173$  K; total data collected = 90605;  $R_1 = 0.0755$  [12723 observed reflections with  $F_o^2 \geq 2\sigma(F_o^2)$ ];  $\omega R_2 = 0.2031$  for 17182 data, 1083 variables, and 91 restraints; largest difference, peak and hole = 2.884 and  $-1.296$  e Å<sup>-3</sup>. The C–C distances within the disordered *tert*-butyl groups were restrained by use of the **SHELXL SADI** instruction to be approximately the same. Likewise, the C–C and the C⋯C distances within the disordered isobutyl groups were also restrained. The Si2–C95 and Si2–C95A distances were restrained to be approximately the same. The rigid-bond restraint (**RIGU**) was applied to the following atoms to improve the quality of their anisotropic displacement parameters: C60 to C63A; C75, C76A to C78A; and C95 to C98. Finally, the following pairs of atoms were constrained to have equivalent anisotropic displacement parameters: C60 and C60A; C95 and C95A. CCDC: 2288686.

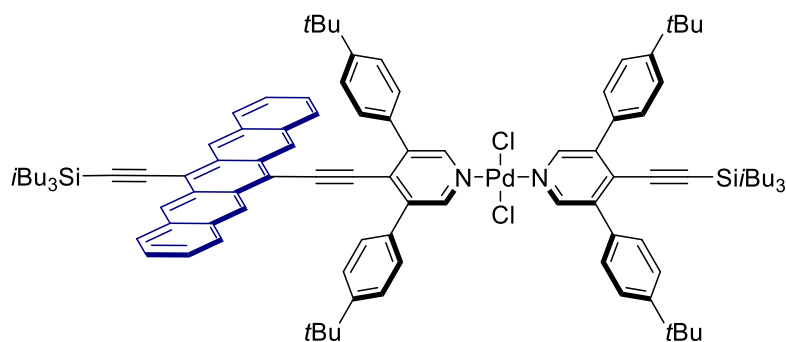

### Compound Pd(L<sub>pc</sub>)(L<sub>ref</sub>)Cl<sub>2</sub>.

A solution of Pd(PhCN)<sub>2</sub>Cl<sub>2</sub> (20 mg, 0.052 mmol) in dry CH<sub>2</sub>Cl<sub>2</sub> (1 mL) was stirred at rt followed by dropwise addition (ca. 1 drop/s) of a solution of L<sub>ref</sub> (35 mg, 0.062

mmol) in dry CH<sub>2</sub>Cl<sub>2</sub> (2 mL) and then a solution of L<sub>pc</sub> (45 mg, 0.052 mmol) in dry CH<sub>2</sub>Cl<sub>2</sub> (2 mL) under an atmosphere of argon. The flask was wrapped in aluminum foil during the reaction to limit light exposure. After addition, the reaction mixture was plugged through a pad of alumina with CH<sub>2</sub>Cl<sub>2</sub>, and the solvent was then removed under reduced pressure. The residue was purified by recycling GPC (CHCl<sub>3</sub>) followed by solvent removed under reduced pressure affording Pd(L<sub>pc</sub>)(L<sub>ref</sub>)Cl<sub>2</sub> as a dark blue-green solid (30 mg, 36%). Mp 256 °C (decomp). *R*<sub>f</sub> = 0.72 (CH<sub>2</sub>Cl<sub>2</sub>/hexanes 1:1). UV-vis (CH<sub>2</sub>Cl<sub>2</sub>) λ<sub>max</sub> (ε) 270 (106000), 306 (sh, 115000), 315 (297000), 346 (sh, 20000), 401(15400), 442 (5890), 584 (sh, 5890), 625 (17000), 677 (30100). IR (CH<sub>2</sub>Cl<sub>2</sub>, cast) 3084 (w), 3050 (w), 2954 (s), 2903 (m), 2867 (m), 2175 (m), 2124 (w), 1589 (m), 1506 (w), 1462 (m) cm<sup>-1</sup>. <sup>1</sup>H NMR (500 MHz, CDCl<sub>3</sub>) δ 9.18 (s, 2H), 8.89 (s, 2H), 8.76 (s, 2H), 8.34 (s, 2H), 7.90–7.85 (m, 6H), 7.56–7.54 (m, 4H), 7.52–7.46 (m, 10H), 7.38–7.34 (m, 4H), 2.17 (nonet, *J* = 6.7 Hz, 3H), 1.59 (nonet, *J* = 6.7 Hz, 3H), 1.38 (s, 18H), 1.178 (s, 18H), 1.177 (d, *J* = 6.6 Hz, 18H), 0.95 (d, *J* = 6.9 Hz, 6H), 0.77 (d, *J* = 6.6 Hz, 18H), 0.47 (d, *J* = 6.6 Hz, 6H). <sup>13</sup>C NMR (125 MHz, CDCl<sub>3</sub>) 152.5, 151.89, 151.5, 151.1, 140.6, 139.9, 133.1, 132.6, 132.4, 132.3, 130.74, 130.70, 130.5, 130.4, 129.5, 129.3, 129.2, 128.4, 126.2, 126.1, 125.9, 125.7, 125.3, 120.3, 116.2, 111.1, 110.4, 104.5, 101.9, 101.4, 100.2, 34.77, 34.76, 31.4, 31.1, 26.6, 26.2, 25.5, 25.4, 24.9, 24.4 (one signal coincident or not observed). MALDI HRMS (DCTB) calcd for C<sub>102</sub>H<sub>122</sub><sup>35</sup>Cl<sub>2</sub>N<sub>2</sub><sup>106</sup>PdSi<sub>2</sub> (M<sup>+</sup>) 1606.7553, found 1606.7539.

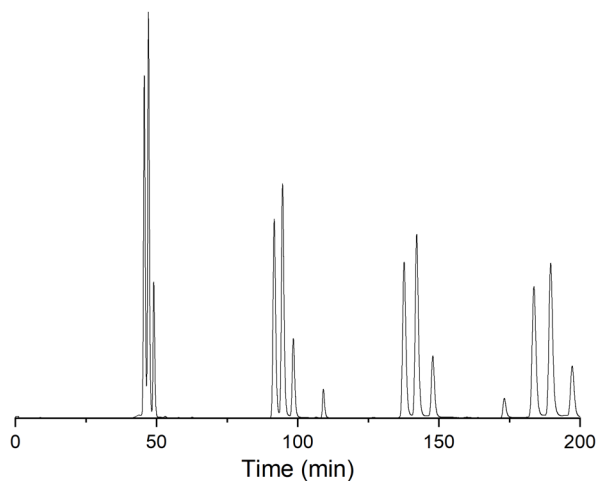

A typical recycling GPC trace of the residue for **Pd(L<sub>pc</sub>)(L<sub>ref</sub>)Cl<sub>2</sub>** (eluting with CHCl<sub>3</sub>,  $\lambda$  = 250 nm).

OpenVnmrj

Department of Chemistry, University of Alberta

Recorded on: **ibd5, Jun 28 2019**  
Pulse Sequence: **s2pul**

Sweep Width(Hz): **6000.6**  
Digital Res.(Hz/pt): **0.09**

Acquisition Time(s): **5**  
Hz per mm(Hz/mm): **25**

Relaxation Delay(s): **0.1**  
Completed Scans: **16**

YH-16  
498.118 MHz H1 1D in cdcl3 (ref. to CDCl3 @ 7.26 ppm)  
temp 26.9 C -> actual temp = 27.0 C, autotx probe

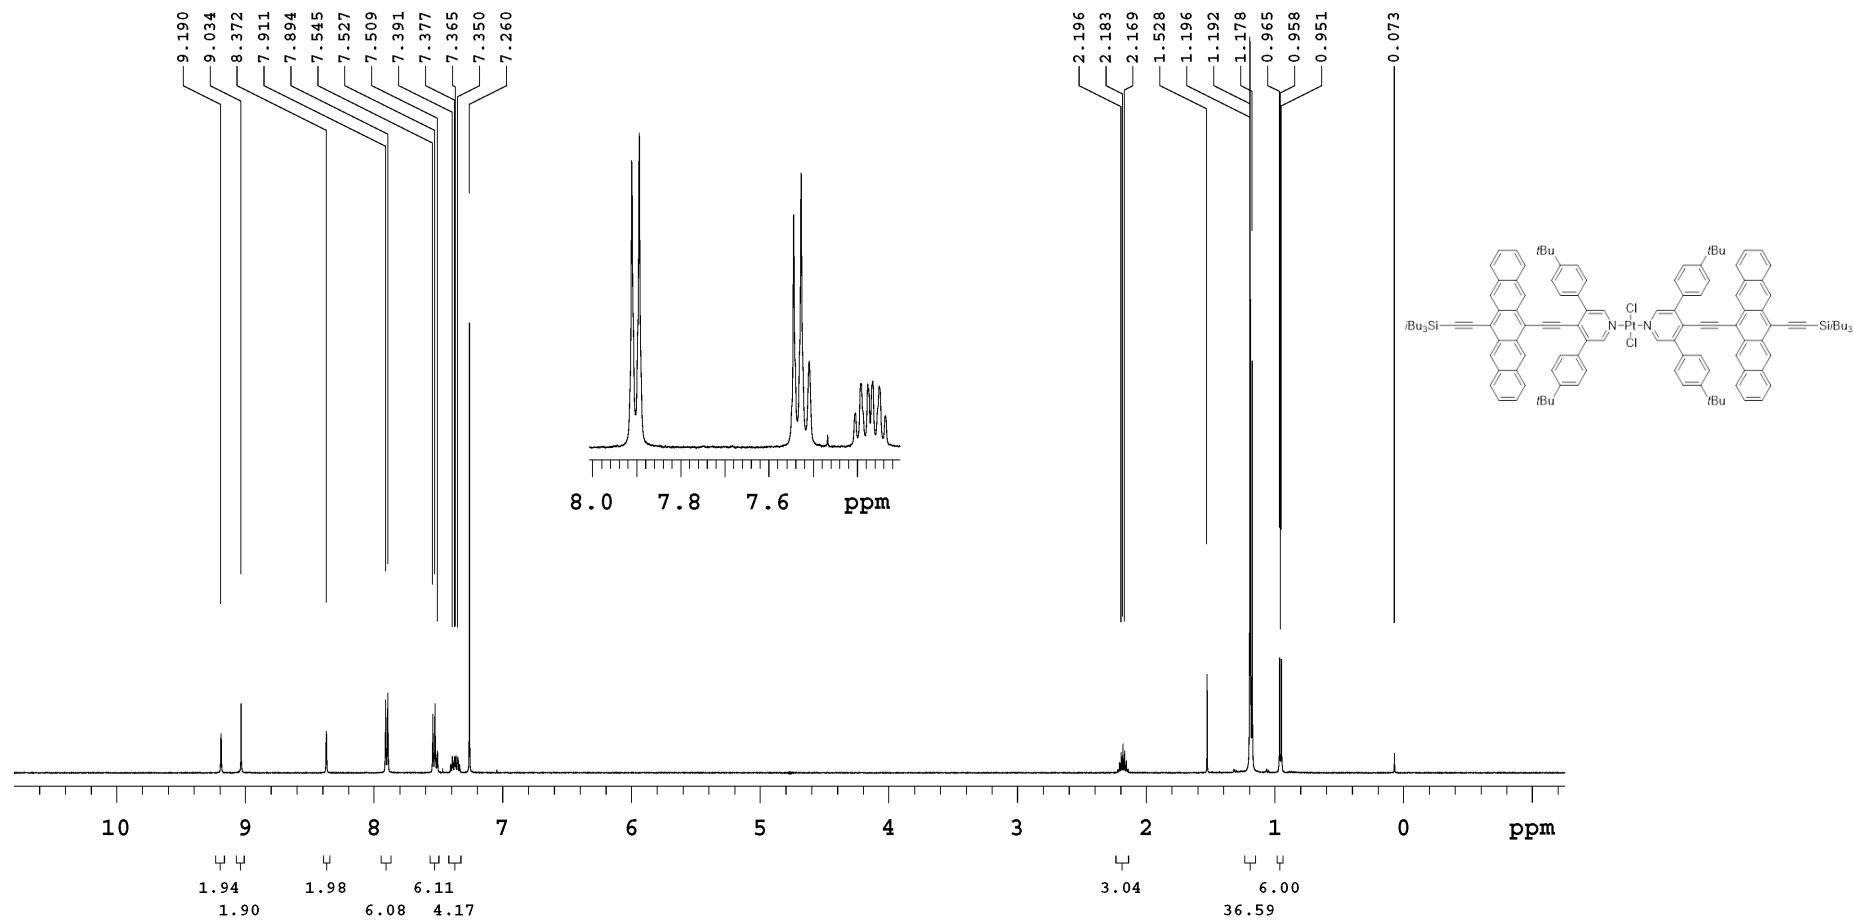

Figure S1.  $^1\text{H}$  NMR spectrum (498 MHz) of compound  $\text{Pt}(\text{L}_{\text{pc}})_2\text{Cl}_2$  in  $\text{CDCl}_3$ .

OpenVnmrj

Recorded on: **u500, Jun 29 2019**  
Pulse Sequence: **s2pul**Sweep Width(Hz): **33783.8**  
Digital Res.(Hz/pt): **0.26**Acquisition Time(s): **1**  
Hz per mm(Hz/mm): **140.76**Relaxation Delay(s): **1**  
Completed Scans: **2508**Yuxuan, YH-16  
125.685 MHz C13{H1} 1D in cdcl3 (ref. to CDCl3 @ 77.06 ppm)  
temp 27.7 C -> actual temp = 27.0 C, cold dual probe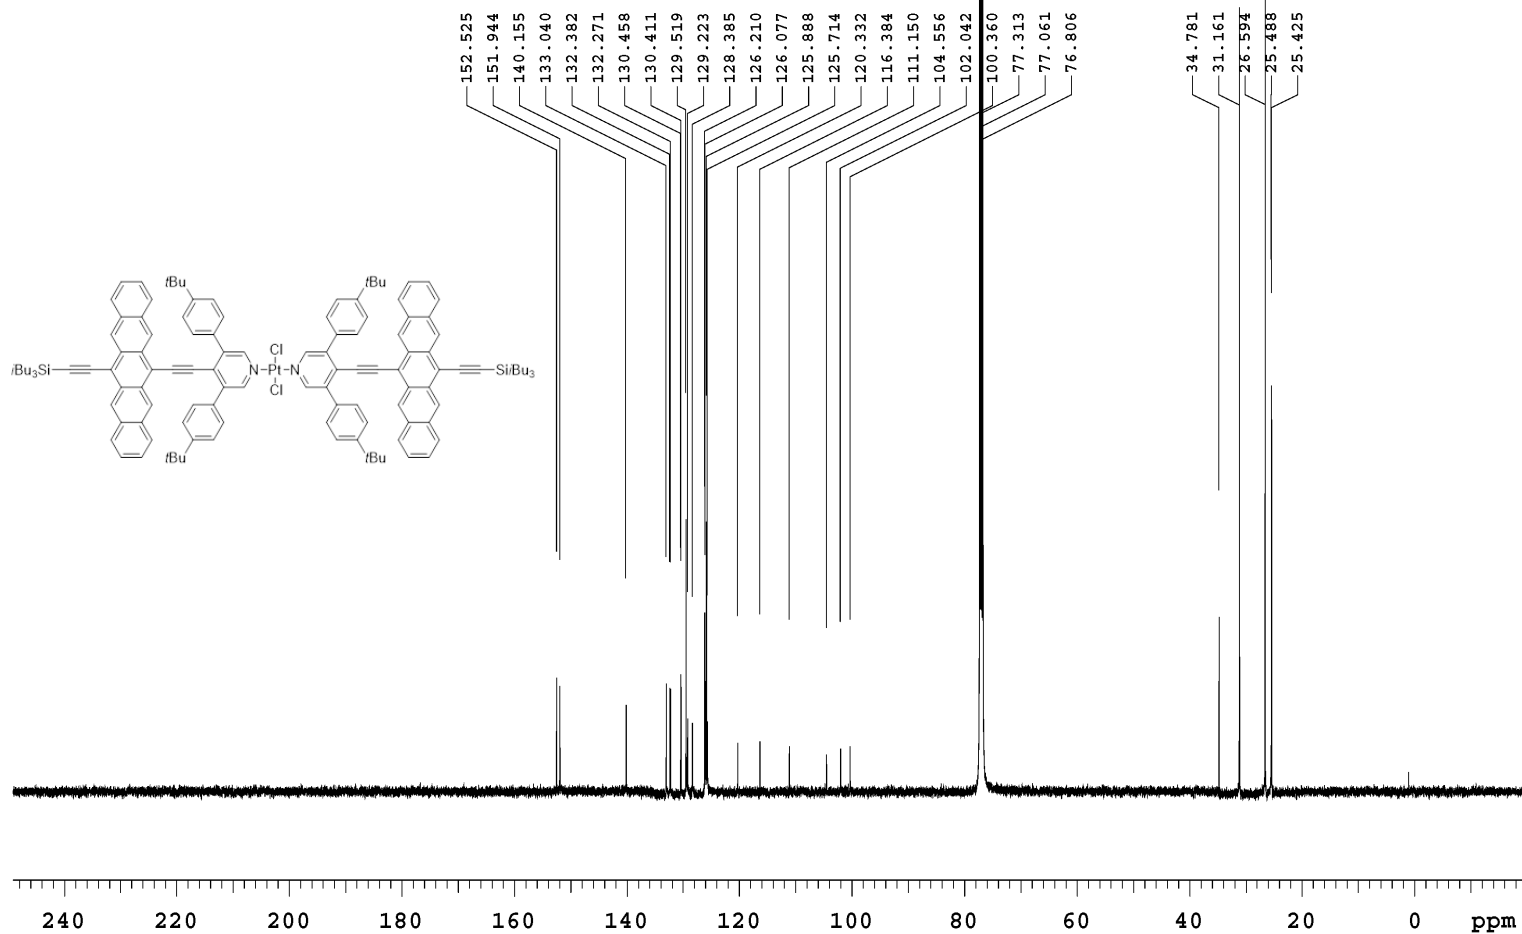Figure S2.  $^{13}\text{C}$  NMR spectrum (126 MHz) of compound  $\text{Pt}(\text{L}_{\text{pc}})_2\text{Cl}_2$  in  $\text{CDCl}_3$ .

OpenVnmrj

Department of Chemistry, University of Alberta

Recorded on: **ibd5, Jul 9 2019**  
Pulse Sequence: **s2pul**

Sweep Width(Hz): **6000.6**  
Digital Res.(Hz/pt): **0.09**

Acquisition Time(s): **5**  
Hz per mm(Hz/mm): **25**

Relaxation Delay(s): **0.1**  
Completed Scans: **16**

YH-17  
498.118 MHz H1 1D in cdcl3 (ref. to CDCl3 @ 7.26 ppm)  
temp 26.9 C -> actual temp = 27.0 C, autotdx probe

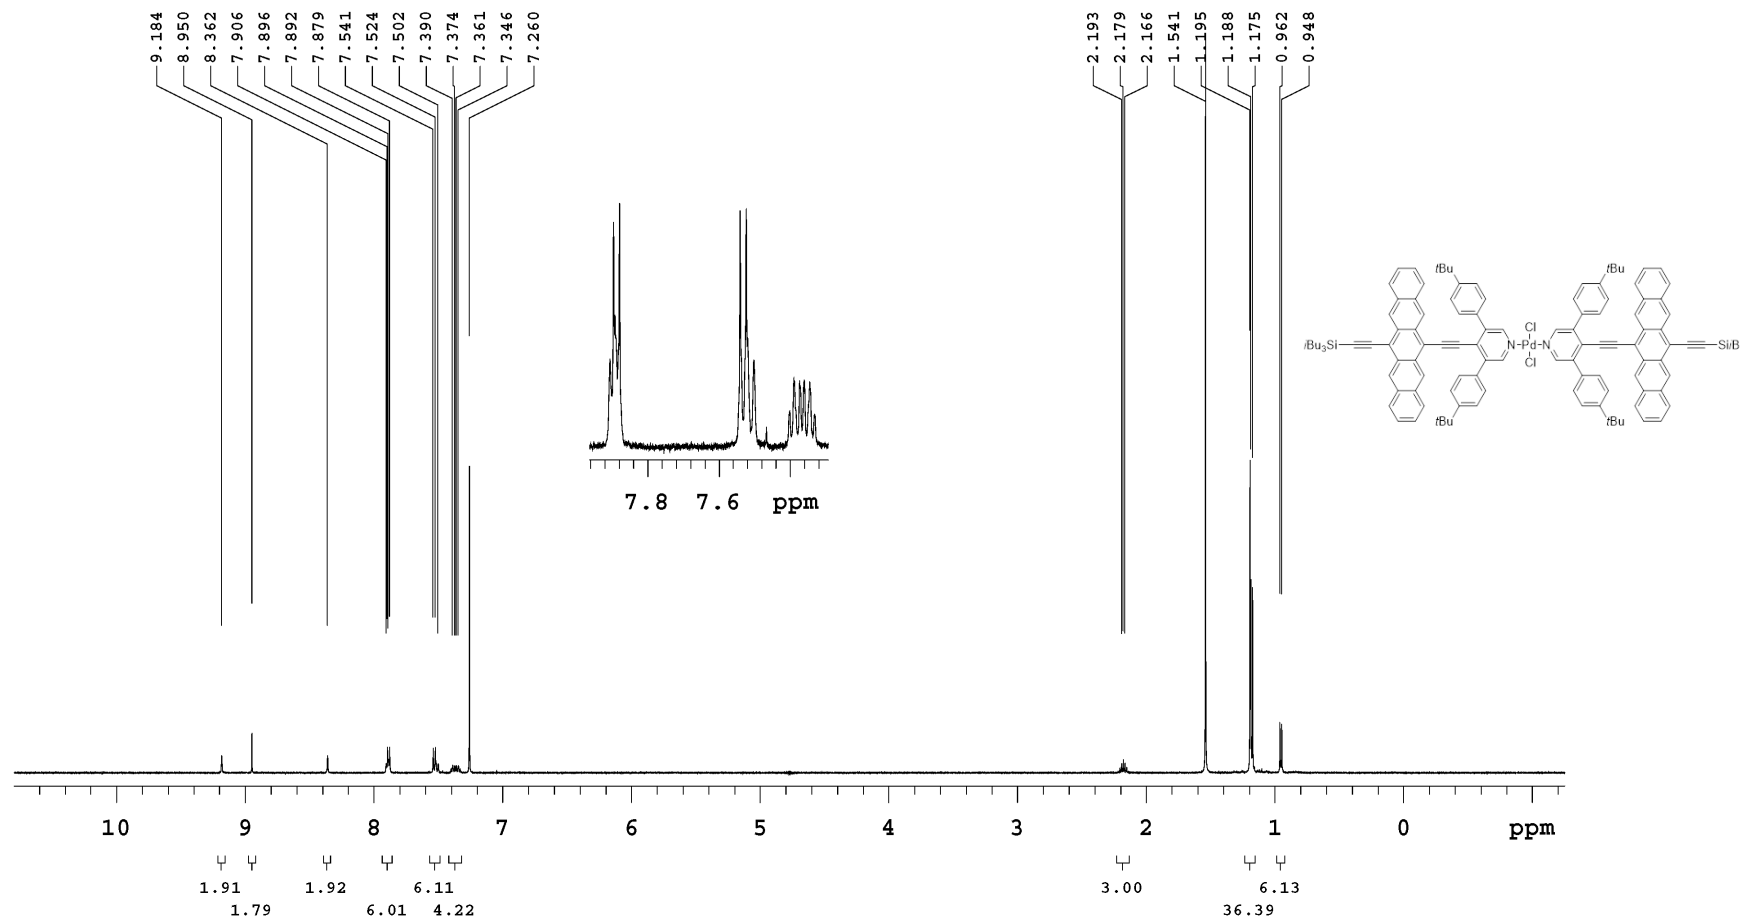

Figure S3.  $^1\text{H}$  NMR spectrum (498 MHz) of compound  $\text{Pd}(\text{L}_{\text{pc}})_2\text{Cl}_2$  in  $\text{CDCl}_3$ .

OpenVnmrj

Recorded on: **u500, Jun 29 2019**  
Pulse Sequence: **s2pul**Sweep Width(Hz): **33783.8**  
Digital Res.(Hz/pt): **0.26**Acquisition Time(s): **1**  
Hz per mm(Hz/mm): **140.76**Relaxation Delay(s): **1**  
Completed Scans: **5000**Yuxuan, YH-17  
125.685 MHz  $^{13}\text{C}\{^1\text{H}\}$  1D in  $\text{cdcl}_3$  (ref. to  $\text{CDCl}_3$  @ 77.06 ppm)  
temp 27.7 C -> actual temp = 27.0 C, cold dual probe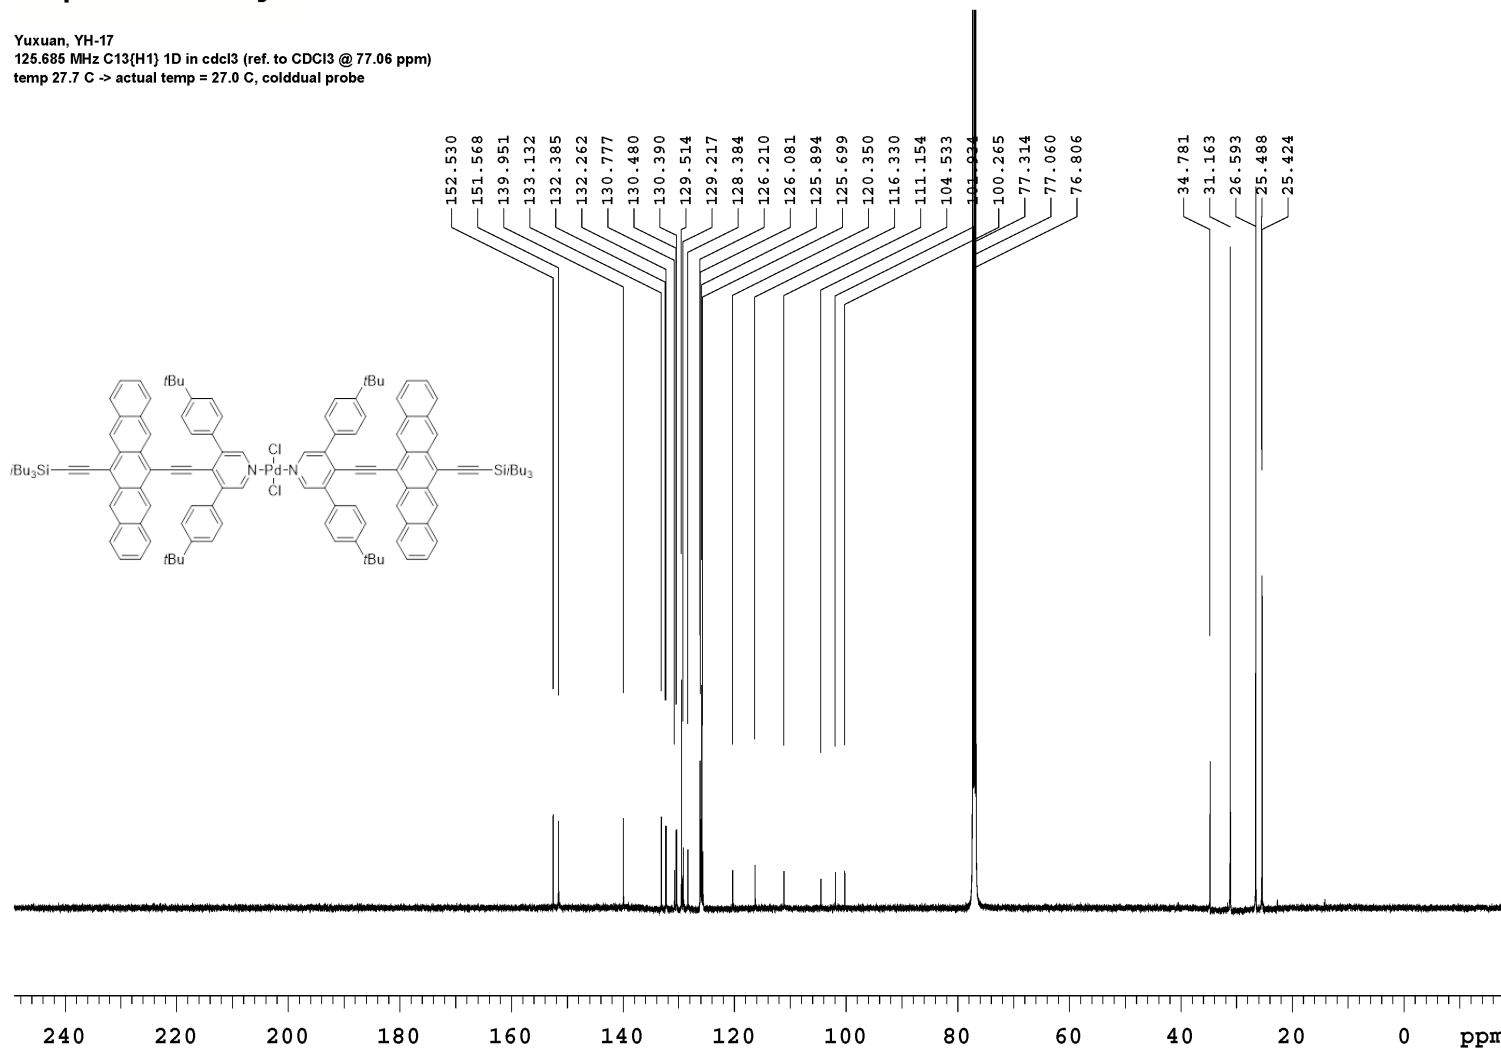Figure S4.  $^{13}\text{C}$  NMR spectrum (126 MHz) of compound  $\text{Pd}(\text{L}_{\text{PC}})_2\text{Cl}_2$  in  $\text{CDCl}_3$ .



OpenVnmrj

Department of Chemistry, University of Alberta

Recorded on: **ibd5, Jun 9 2020**  
Pulse Sequence: **PRESAT**

Sweep Width(Hz): **6000.6**  
Digital Res.(Hz/pt): **0.09**

Acquisition Time(s): **5**  
Hz per mm(Hz/mm): **25.64**

Relaxation Delay(s): **0.1**  
Completed Scans: **16**

YH-57  
498.118 MHz H1 1D in cdcl3 (ref. to CDCl3 @ 7.26 ppm)  
temp 26.9 C -> actual temp = 27.0 C, autoxdr probe

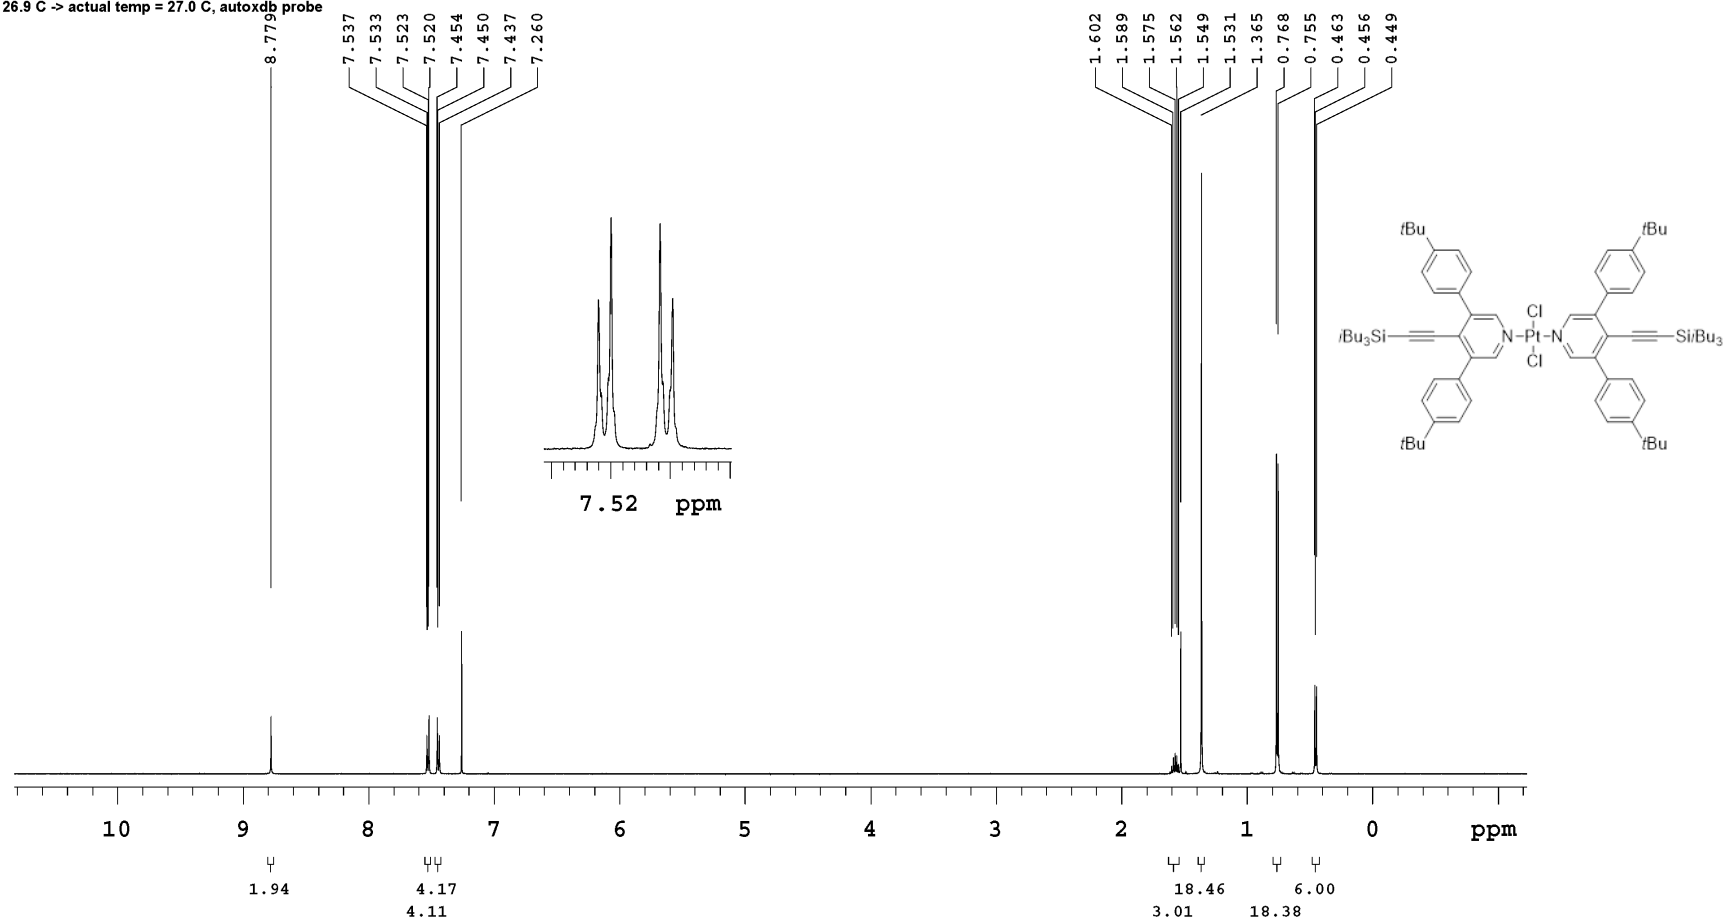

Figure S5.  $^1\text{H}$  NMR spectrum (498 MHz) of compound  $\text{Pt}(\text{L}_{\text{ref}})_2\text{Cl}_2$  in  $\text{CDCl}_3$ .

OpenVnmrj

Recorded on: **u500, Jun 6 2020**  
Pulse Sequence: **s2pul**Sweep Width(Hz): **33783.8**  
Digital Res.(Hz/pt): **0.26**Acquisition Time(s): **1**  
Hz per mm(Hz/mm): **140.76**Relaxation Delay(s): **1**  
Completed Scans: **812**Yuxuan, YH-57  
125.685 MHz C13{H1} 1D in cdcl3 (ref. to CDCl3 @ 77.06 ppm)  
temp 27.7 C -> actual temp = 27.0 C, cold dual probe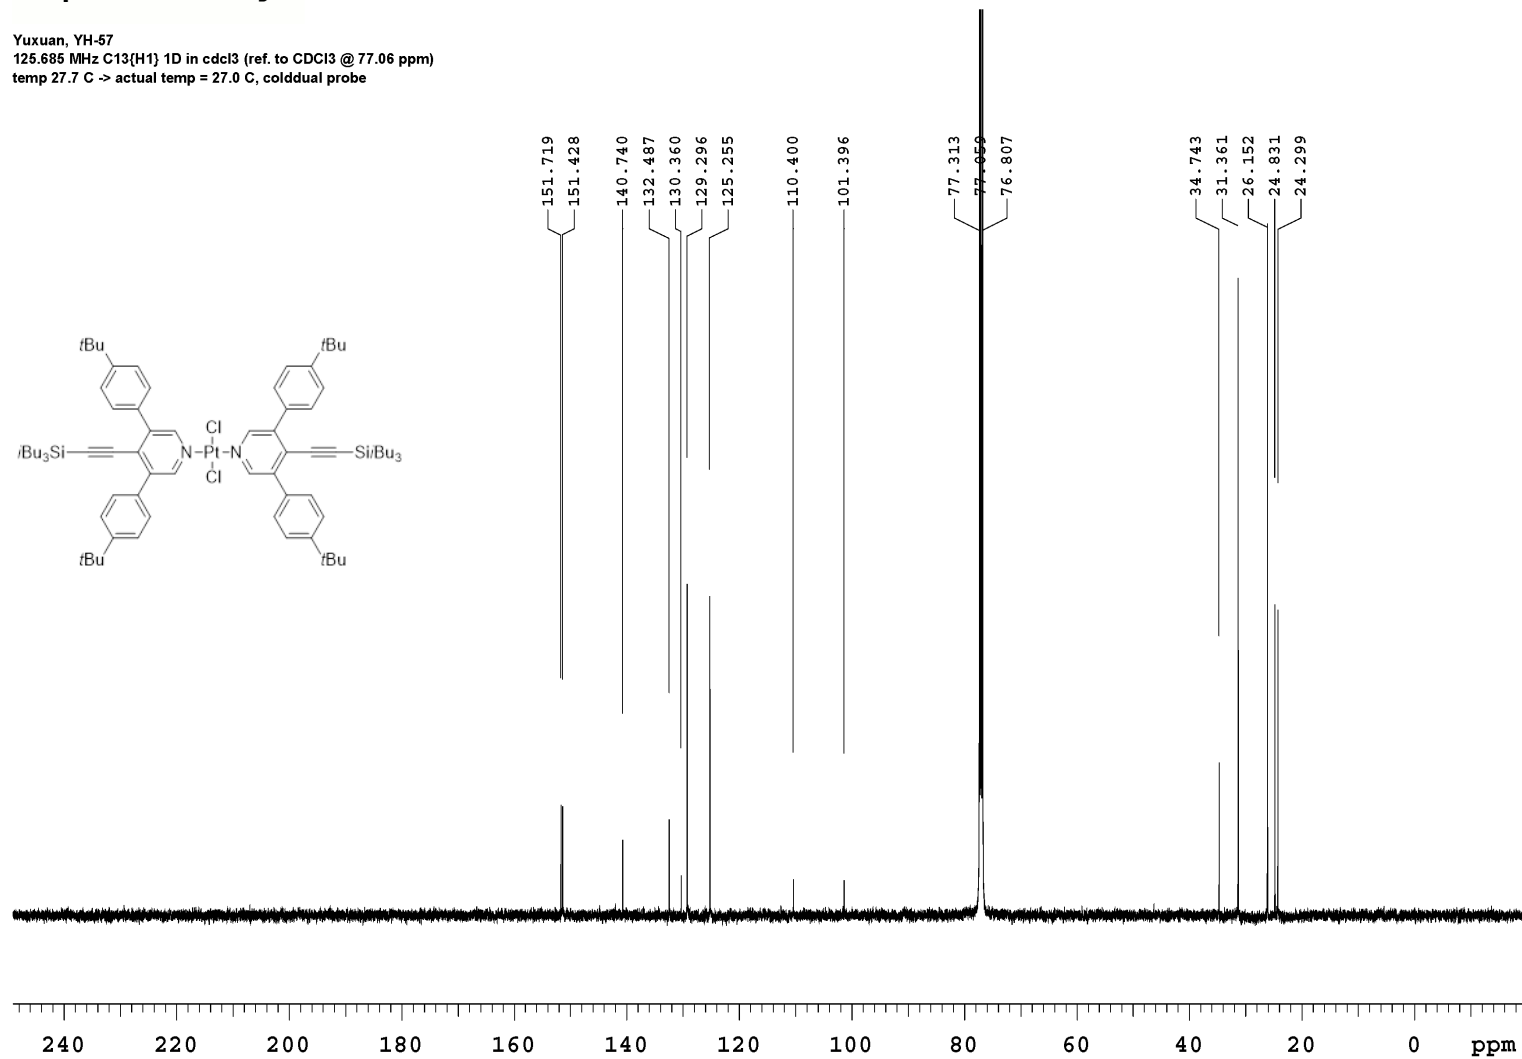Figure S6.  $^{13}\text{C}$  NMR spectrum (126 MHz) of compound  $\text{Pt}(\text{L}_{\text{ref}})_2\text{Cl}_2$  in  $\text{CDCl}_3$ .

OpenVnmrj

YH-60  
399.978 MHz H1 1D in cdcl3 (ref. to CDCl3 @ 7.26 ppm)  
temp 25.9 C -> actual temp = 27.0 C, onenmr probe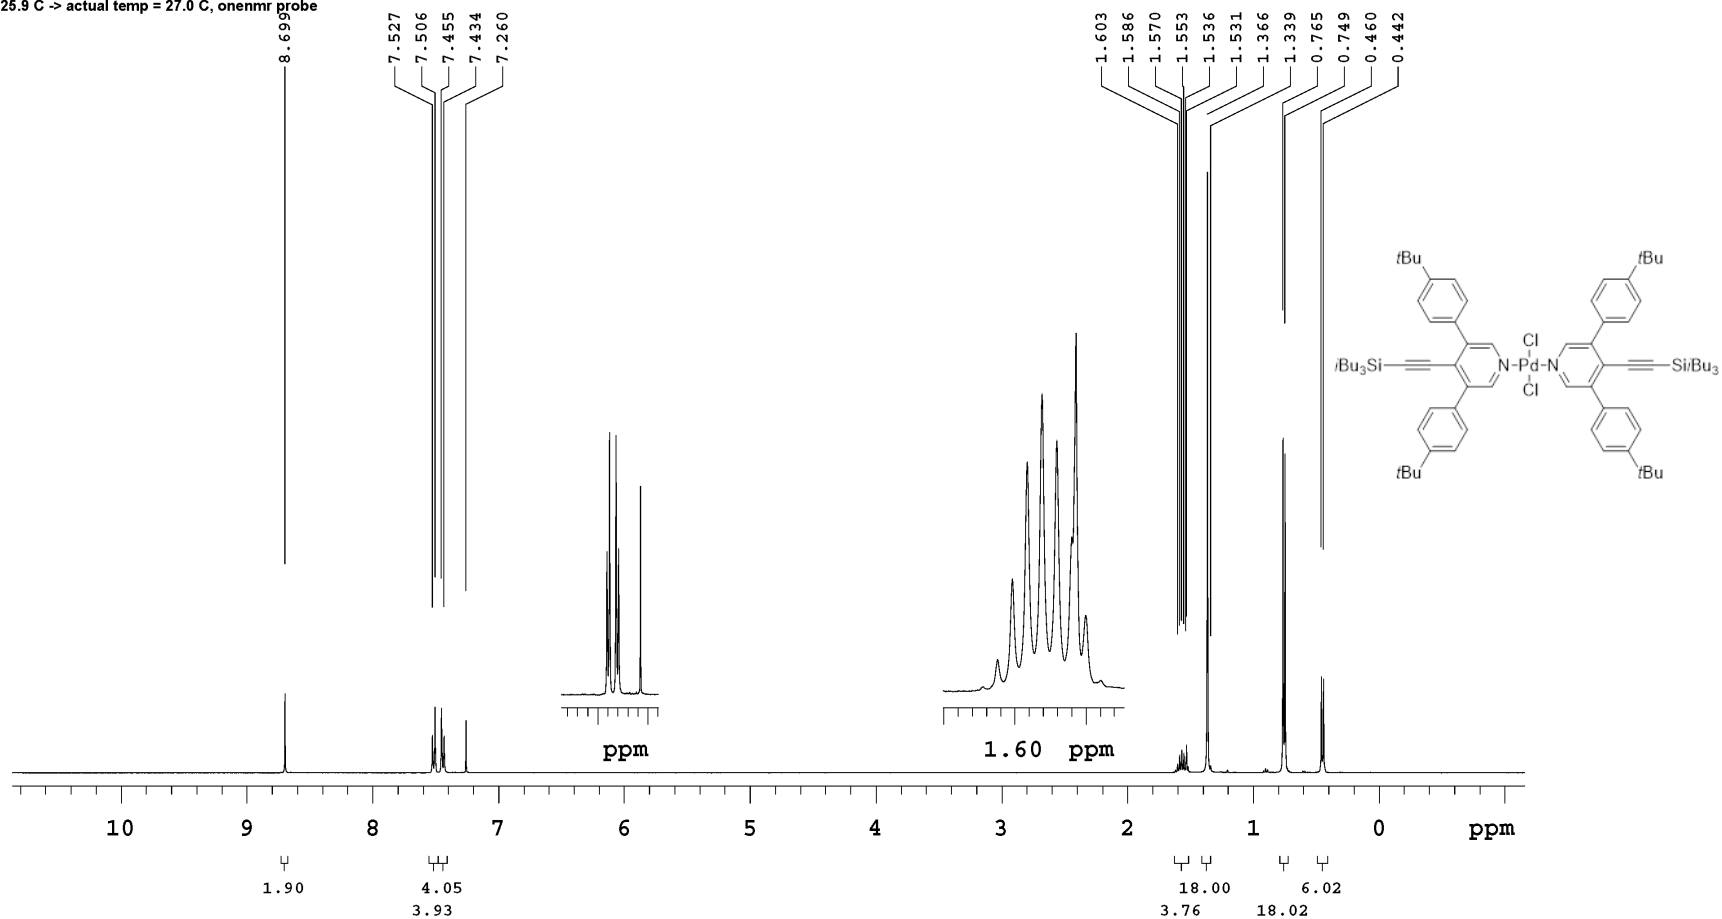Figure S7.  $^1\text{H}$  NMR spectrum (400 MHz) of compound  $\text{Pd}(\text{L}_{\text{ref}})_2\text{Cl}_2$  in  $\text{CDCl}_3$ .

OpenVnmrj

Recorded on: **u500, Jun 9 2020**  
Pulse Sequence: **s2pul**Sweep Width(Hz): **33783.8**  
Digital Res.(Hz/pt): **0.26**Acquisition Time(s): **1**  
Hz per mm(Hz/mm): **140.76**Relaxation Delay(s): **1**  
Completed Scans: **752**Yuxuan, YH-60  
125.685 MHz C13{H1} 1D in cdcl3 (ref. to CDCl3 @ 77.06 ppm)  
temp 27.7 C -> actual temp = 27.0 C, coldual probe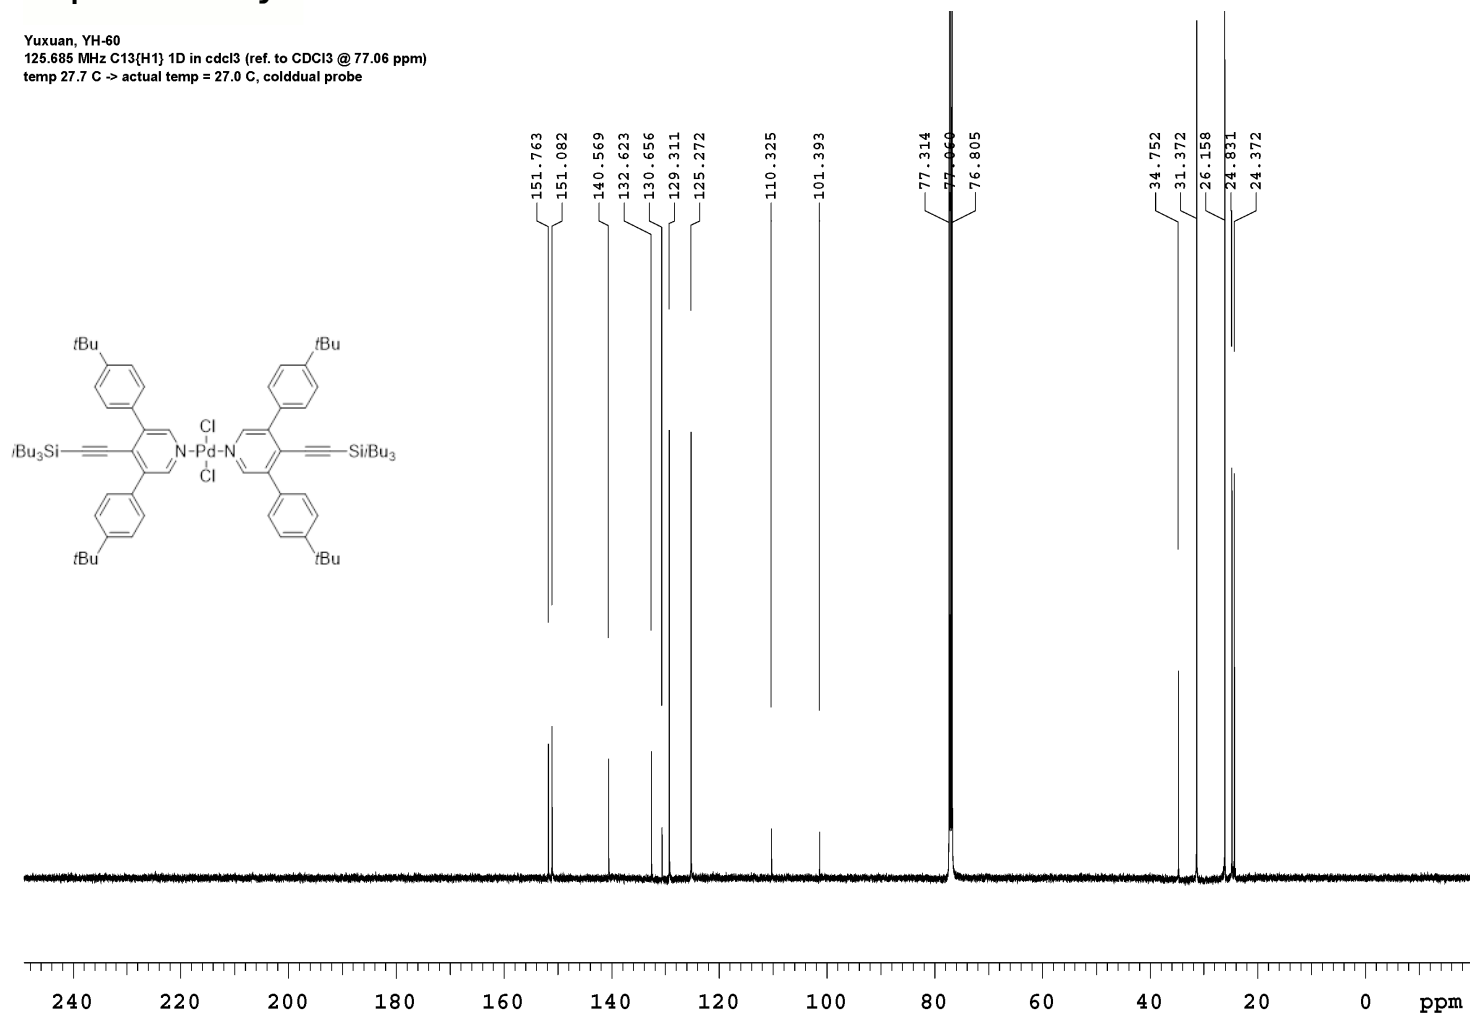Figure S8.  $^{13}\text{C}$  NMR spectrum (126 MHz) of compound  $\text{Pd}(\text{L}_{\text{ref}})_2\text{Cl}_2$  in  $\text{CDCl}_3$ .

OpenVnmrj

Recorded on: **ibd5, Jul 4 2020**  
Pulse Sequence: **PRESAT**Sweep Width(Hz): **6000.6**  
Digital Res.(Hz/pt): **0.09**Acquisition Time(s): **5**  
Hz per mm(Hz/mm): **25.64**Relaxation Delay(s): **0.1**  
Completed Scans: **16**

YH-58

498.118 MHz H1 1D in cdcl3 (ref. to CDCl3 @ 7.26 ppm)

temp 26.9 C v actual temp = 27.0 C, autoxdr probe

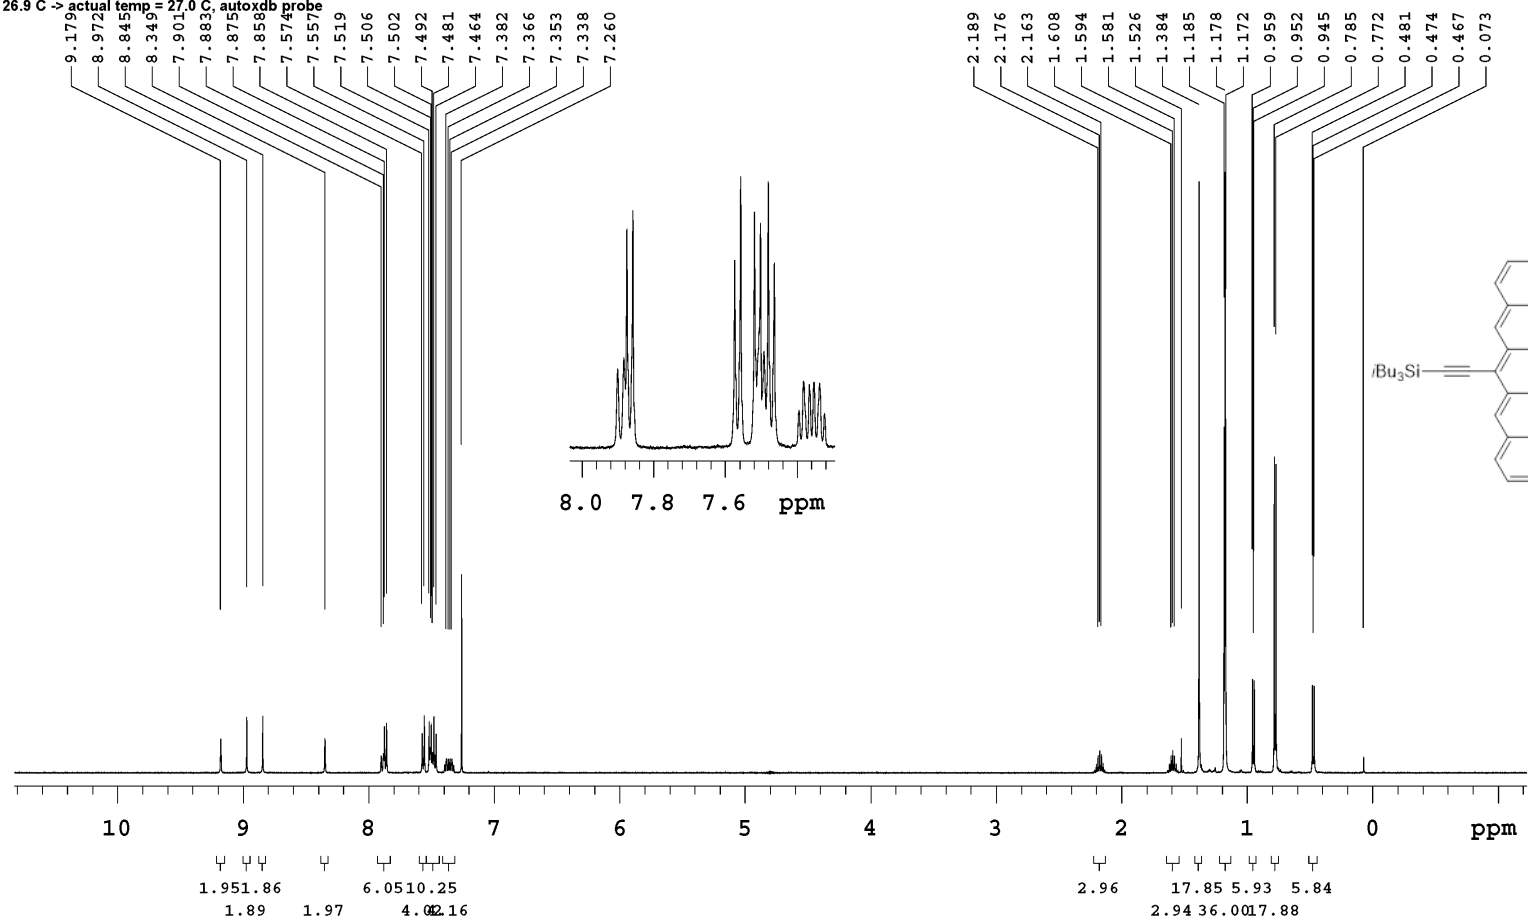Figure S9.  $^1\text{H}$  NMR spectrum (498 MHz) of compound  $\text{Pt}(\text{L}_{\text{pc}})(\text{L}_{\text{ref}})\text{Cl}_2$  in  $\text{CDCl}_3$ .

Yuxuan, YH-58

125.685 MHz  $^{13}\text{C}\{^1\text{H}\}$  1D in  $\text{cdcl}_3$  (ref. to  $\text{CDCl}_3$  @ 77.06 ppm)

temp 27.7 C -&gt; actual temp = 27.0 C, cold dual probe

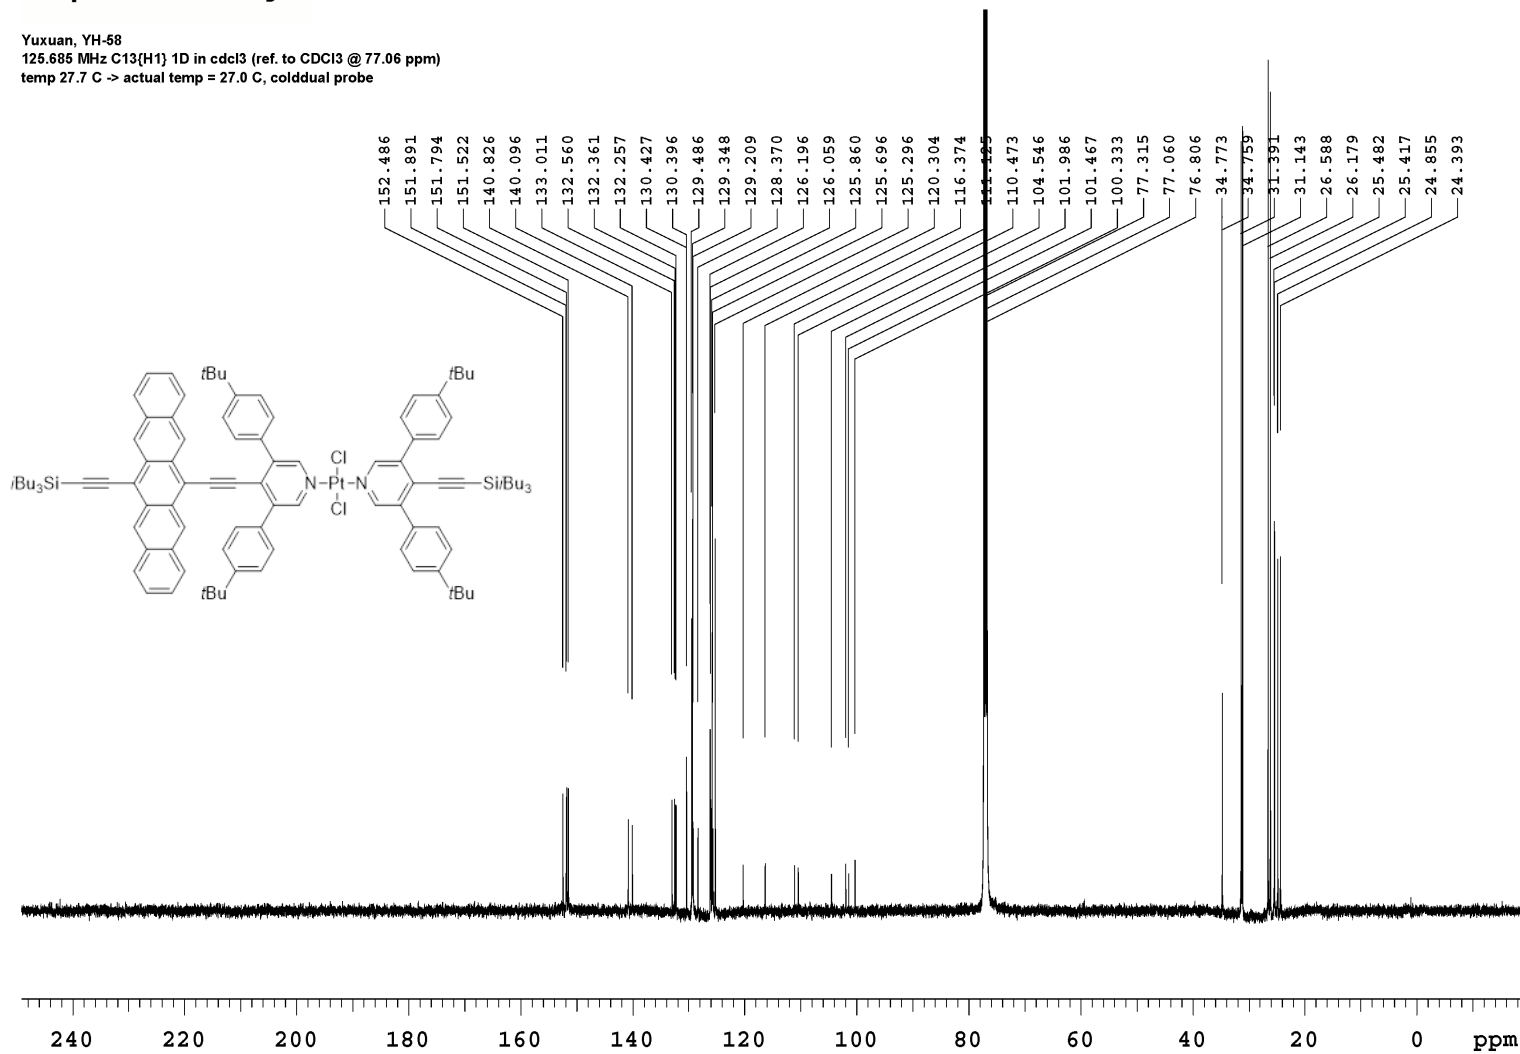

Figure S10.  $^{13}\text{C}$  NMR spectrum (126 MHz) of compound  $\text{Pt}(\text{L}_{\text{pc}})(\text{L}_{\text{ref}})\text{Cl}_2$  in  $\text{CDCl}_3$ .

OpenVnmrj

Recorded on: **ibd5, Jun 22 2023** Sweep Width(Hz): **5971.04** Acquisition Time(s): **5.005** Relaxation Delay(s): **0.1**  
 Pulse sequence: **PRESAT** Digital Res. (Hz/ppm): **0.09** Hz per channel: **24.88** Completed Scans: **16**

YH-61

498.118 MHz H1 1D in cdcl3 (ref. to CDC13 @ 7.26 ppm)

temp 26.9 C -&gt; actual temp = 27.0 C, autoxzb probe

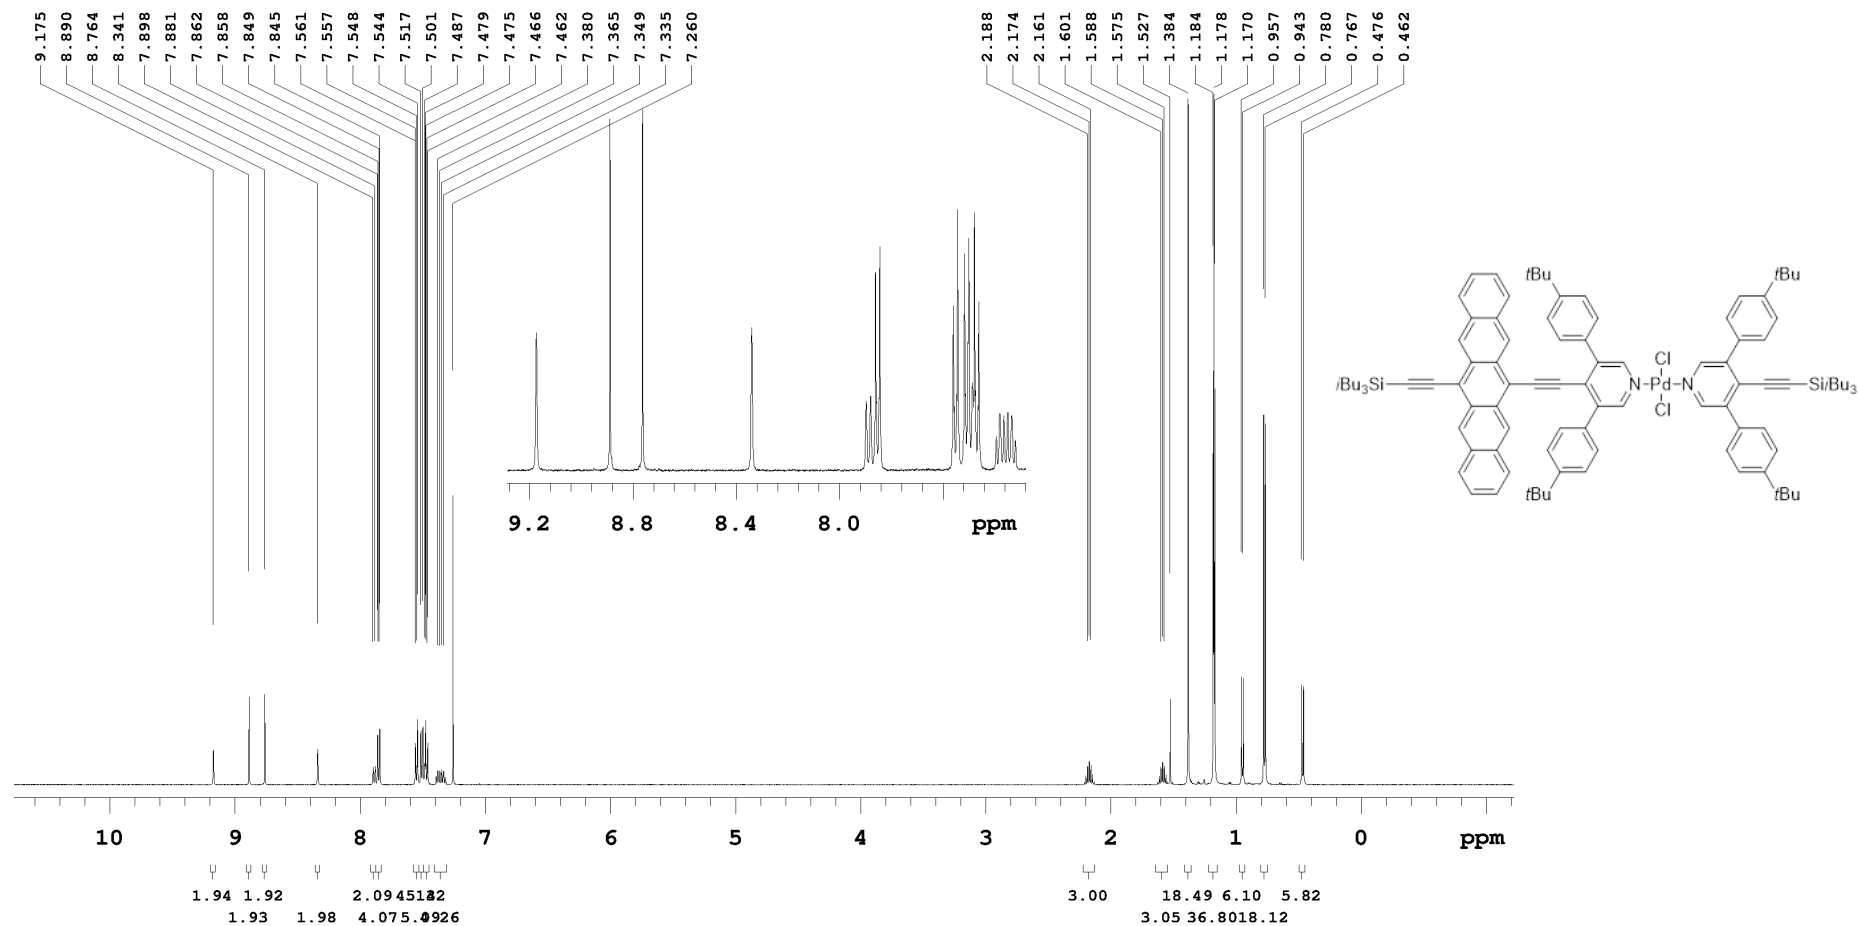

Figure S11. <sup>1</sup>H NMR spectrum (498 MHz) of compound **Pd(L<sub>pc</sub>)(L<sub>ref</sub>)Cl<sub>2</sub>** in CDCl<sub>3</sub>.

OpenVnmrj

Recorded on: v700, Jun 22 2023 Sweep Width(Hz): 46296.3 Acquisition Time(s): 1 Relaxation Delay(s): 1  
Pulse Sequence: s2pul Digital Res. (Hz/ppm): 0.35 Hz per sec (Hz/s): 192.9 Completed Scans: 2508

Yuxuan, YH-61

175.976 MHz C13{H1} 1D in cdcl3 (ref. to CDCl3 @ 77.06 ppm)

temp 27.5 C -&gt; actual temp = 27.0 C, coldid probe

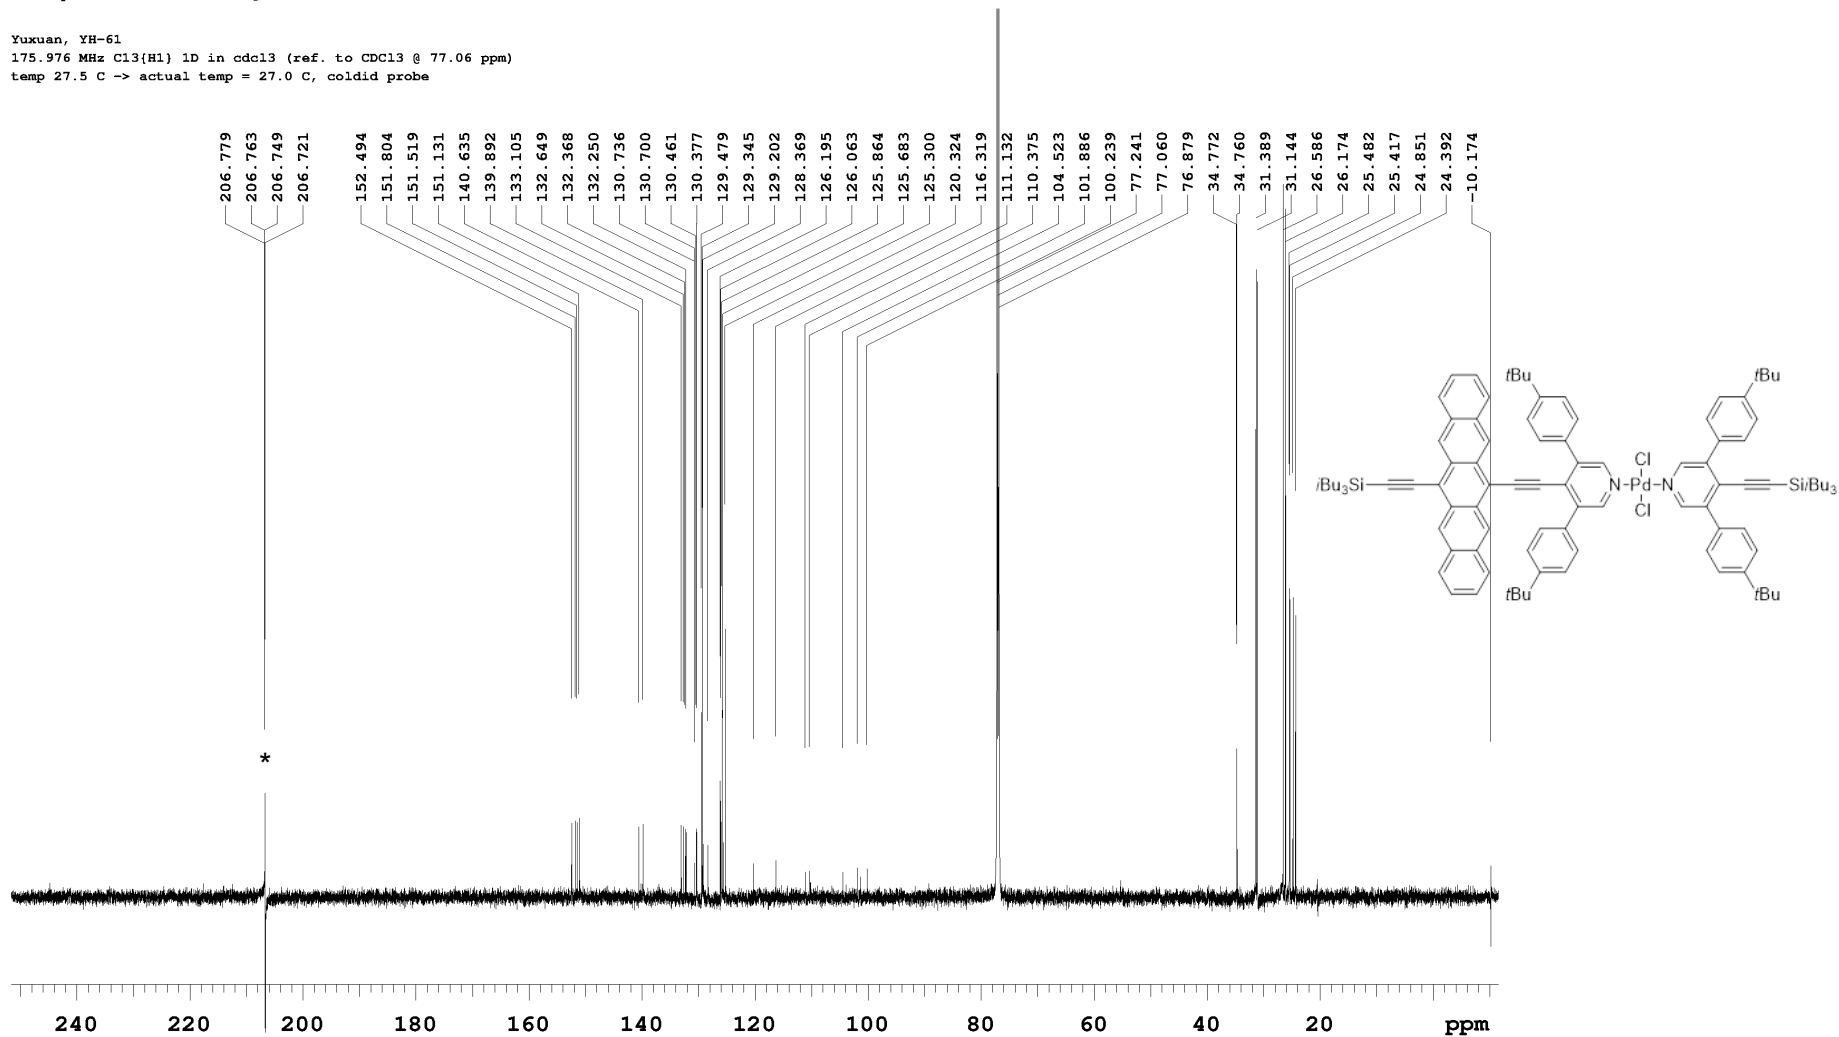

Figure S12.  $^{13}\text{C}$  NMR spectrum (176 MHz) of compound  $\text{Pd}(\text{L}_{\text{pc}})(\text{L}_{\text{ref}})\text{Cl}_2$  in  $\text{CDCl}_3$  (\*artifact peak from the environment).



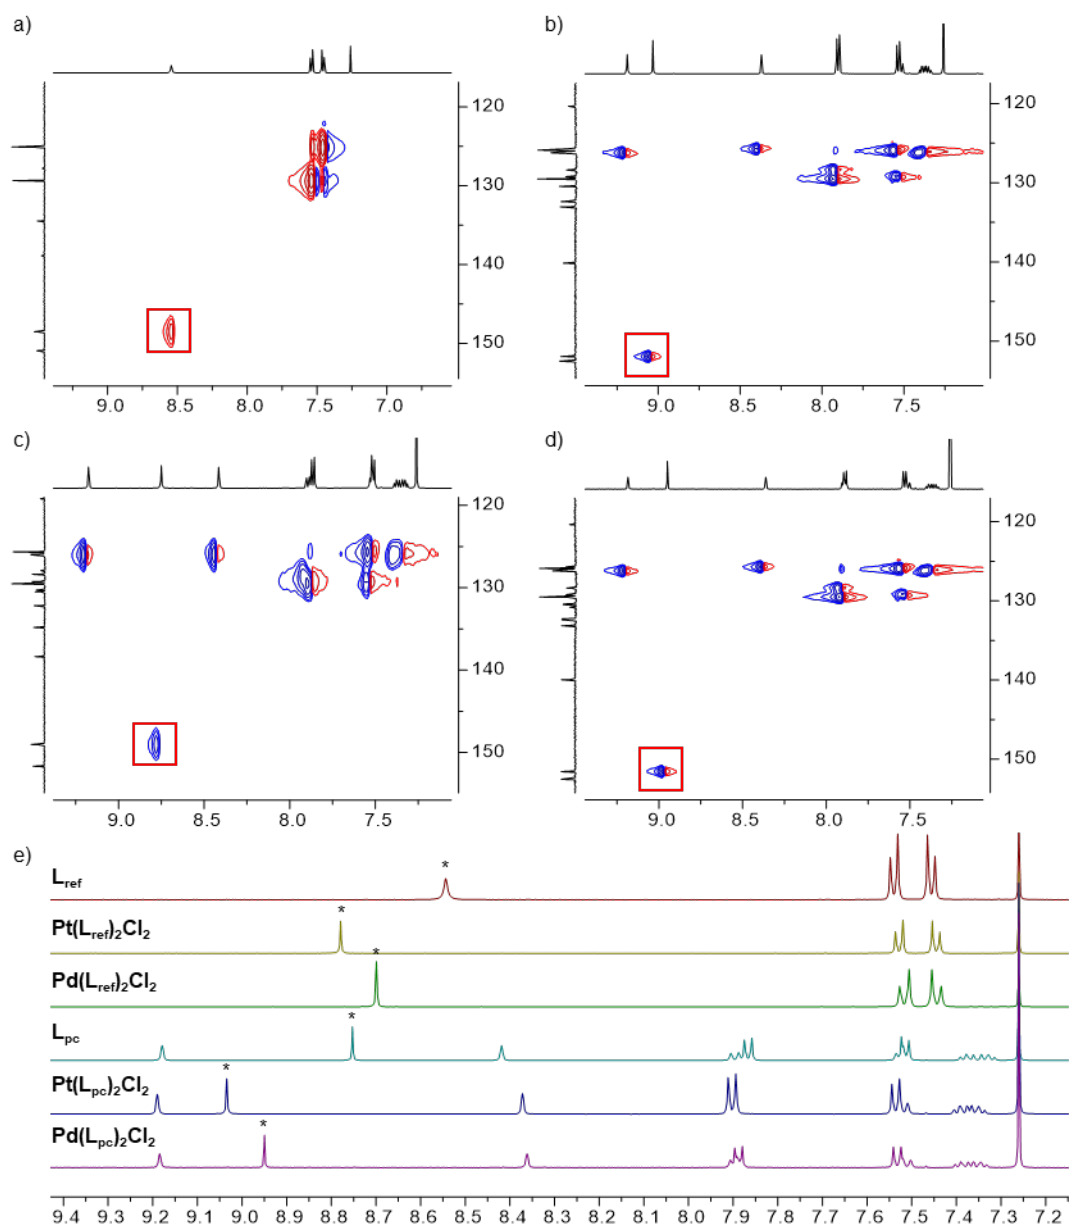

**Figure S13.** Aromatic region of  $^1\text{H}$ - $^{13}\text{C}$  HSQC spectra of a)  $\text{L}_{\text{ref}}$ , b)  $\text{L}_{\text{pc}}$ , c)  $\text{Pt}(\text{L}_{\text{pc}})_2\text{Cl}_2$ , and d)  $\text{Pd}(\text{L}_{\text{pc}})_2\text{Cl}_2$  in  $\text{CDCl}_3$ ; e) stacked plot of the aromatic region of  $^1\text{H}$  NMR spectra (in  $\text{CDCl}_3$ ) for compound  $\text{L}_{\text{ref}}$ ,  $\text{Pt}(\text{L}_{\text{ref}})_2\text{Cl}_2$ ,  $\text{Pd}(\text{L}_{\text{ref}})_2\text{Cl}_2$ ,  $\text{L}_{\text{pc}}$ ,  $\text{Pt}(\text{L}_{\text{pc}})_2\text{Cl}_2$ , and  $\text{Pd}(\text{L}_{\text{pc}})_2\text{Cl}_2$ . Signals for protons on pyridyl are labeled with \*.

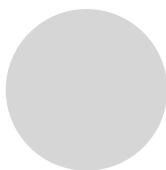

## Mass Spectrometry Facility Department of Chemistry

### Analysis Info

Analysis Name: T:\Service\200622\_0\_E4\_000002.d  
Method: MALDI\_DCTB\_2k\_new  
Sample Name: YH-16-3  
Comment: Y. Hou, R. Tykwinski, DCTB as matrix, 9.4T FTICR MS

Acquisition Date: 22/06/2020 2:12:37 PM  
Instrument: apex-Qe  
Operator:

### Acquisition Parameter

Ionisation Mode: Positive MALDI Mode: n/a

### Generate Molecular Formula Parameter

Formula, min.: C<sub>95</sub>  
Formula, max.: C<sub>126</sub>H<sub>134</sub>N<sub>2</sub>O<sub>0</sub>Cl<sub>2</sub>Si<sub>2</sub>Pt  
Measured m/z: 1995.91 Charge: 1 Tolerance: 2 ppm  
Check Valence: no Min.: 0 Max.: 0  
Nitrogen Rule: no  
Filter H/C Ratio: no Min.: 0 Max.: 3  
Estimate # of C: yes Electron Configuration: both

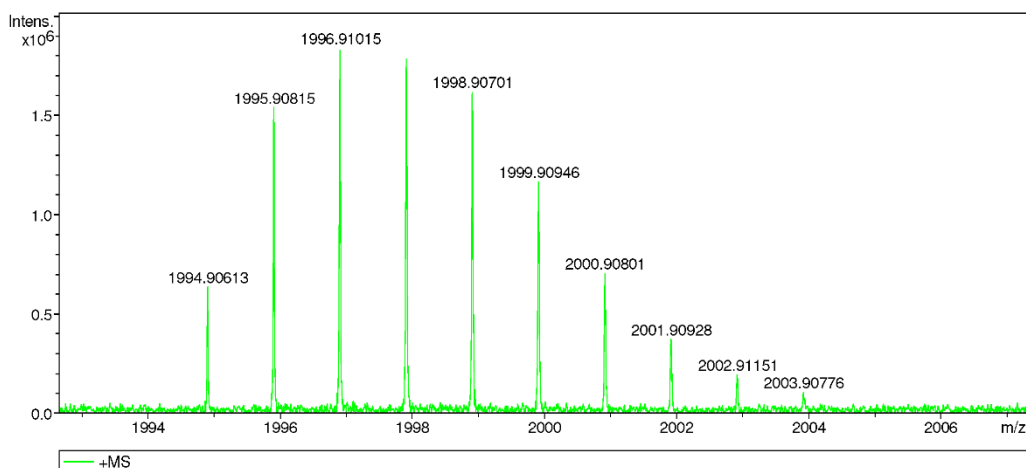

| Sum Formula                                                                                                     | Sigma | m/z        | Err [ppm] | Mean Err [ppm] | Err [mDa] | rdb   | N Rule | e <sup>-</sup> |
|-----------------------------------------------------------------------------------------------------------------|-------|------------|-----------|----------------|-----------|-------|--------|----------------|
| C <sub>126</sub> H <sub>134</sub> Cl <sub>2</sub> N <sub>2</sub> O <sub>0</sub> Pt <sub>1</sub> Si <sub>2</sub> | 0.106 | 1995.91049 | 1.17      | 2.11           | 2.34      | 62.00 | -      | odd            |

**Figure S14.** Expansion of HRMS for compound **Pt(L<sub>pc</sub>)<sub>2</sub>Cl<sub>2</sub>**

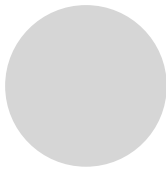

## Mass Spectrometry Facility Department of Chemistry

### Analysis Info

Analysis Name: T:\Service\200622\_0\_E8\_000001.d  
Method: MALDI\_DCTB\_2k\_new  
Sample Name: YH-17-7  
Comment: Y. Hou, R. Tykwinski, DCTB as matrix, 9.4T FTICR MS

Acquisition Date: 22/06/2020 2:01:32 PM  
Instrument: apex-Qe  
Operator:

### Acquisition Parameter

Ionisation Mode: Positive MALDI Mode: n/a

### Generate Molecular Formula Parameter

Formula, min.: C<sub>92</sub>  
Formula, max.: C<sub>126</sub>H<sub>134</sub>N<sub>2</sub>O<sub>0</sub>Cl<sub>2</sub>Si<sub>2</sub>Pd  
Measured m/z: 1906.85 Charge: 1 Tolerance: 2 ppm  
Check Valence: no Min.: 0 Max.: 0  
Nitrogen Rule: no  
Filter H/C Ratio: no Min.: 0 Max.: 3  
Estimate # of C: yes Electron Configuration: both

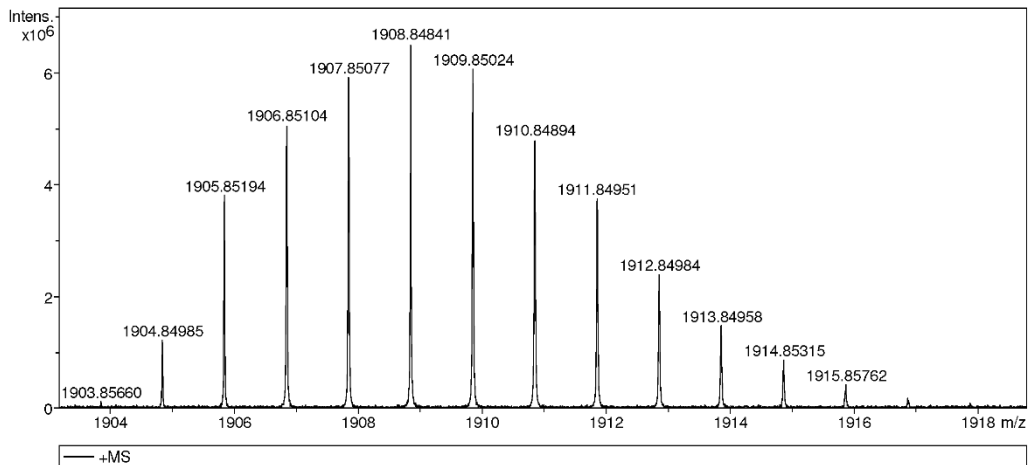

| Sum                            | Formula | Sigma | m/z        | Err [ppm] | Mean Err [ppm] | Err [mDa] | rdb   | N Rule | e <sup>-</sup> |
|--------------------------------|---------|-------|------------|-----------|----------------|-----------|-------|--------|----------------|
| C 126 H 134 Cl 2 N 2 Pd 1 Si 2 |         | 0.100 | 1906.84920 | -0.97     | 1.30           | -1.85     | 62.00 | ok     | odd            |

**Figure S15.** Expansion of HRMS for compound Pd(L<sub>pc</sub>)<sub>2</sub>Cl<sub>2</sub>

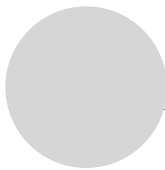

## Mass Spectrometry Facility Department of Chemistry

### Analysis Info

Analysis Name: T:\Service\200609\_0\_O4\_000002.d  
Method: MALDI\_DCTB\_1k\_new  
Sample Name: YH-57-1  
Comment: Y. Hou, R. Tykwinski, DCTB as matrix, 9.4T FTICR MS

Acquisition Date: 09/06/2020 10:37:54 AM  
Instrument: apex-Qe  
Operator:

### Acquisition Parameter

Ionisation Mode: Positive MALDI Mode: n/a

### Generate Molecular Formula Parameter

Formula, min.: C64  
Formula, max.: C78H110N2O0Si2Cl2PtNa  
Measured m/z: 1418.71 Charge: 1 Tolerance: 2 ppm  
Check Valence: no Min.: 0 Max.: 0  
Nitrogen Rule: no  
Filter H/C Ratio: no Min.: 0 Max.: 3  
Estimate # of C: yes Electron Configuration: both

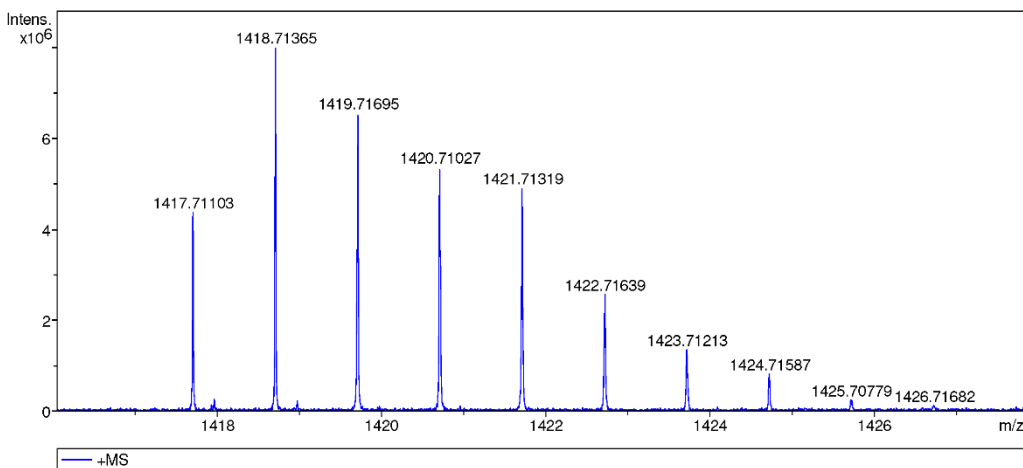

| Sum                                | Formula | Sigma | m/z        | Err [ppm] | Mean Err [ppm] | Err [mDa] | rdb   | N Rule | e <sup>-</sup> |
|------------------------------------|---------|-------|------------|-----------|----------------|-----------|-------|--------|----------------|
| C 78 H 110 Cl 2 N 2 Na 1 Pt 1 Si 2 |         | 0.177 | 1418.71246 | -0.84     | -0.54          | -1.20     | 25.50 | -      | even           |

**Figure S16.** Expansion of HRMS for compound  $\text{Pt}(\text{L}_{\text{ref}})_2\text{Cl}_2$

## Qualitative Compound Report

|                        |                      |                    |           |
|------------------------|----------------------|--------------------|-----------|
| <b>Data File</b>       | 20061203.d           | <b>Sample Name</b> | yh-60-1   |
| <b>Instrument Name</b> | oaTOF6220            | <b>User Name</b>   | ami       |
| <b>Acquired Time</b>   | 6/12/2020 3:57:14 PM | <b>DA Method</b>   | ami-fia.m |
| <b>Comment</b>         | Y. Hoyu, Tykwinski   |                    |           |

### MS Spectrum

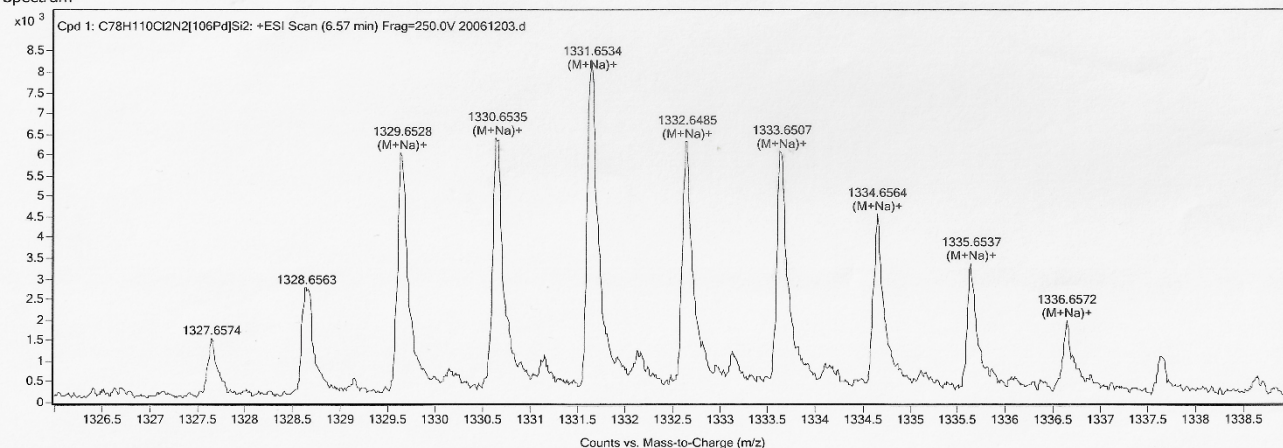

### MS Spectrum Peak List

| Formula                                                                                       | m/z       | Calc m/z  | Diff(ppm) | z | Ion                 | Abund |
|-----------------------------------------------------------------------------------------------|-----------|-----------|-----------|---|---------------------|-------|
| C <sub>78</sub> H <sub>110</sub> Cl <sub>2</sub> N <sub>2</sub> Na [106Pd]<br>Si <sub>2</sub> | 1329.6528 | 1329.6512 | 1.24      | 1 | (M+Na) <sup>+</sup> | 6009  |

--- End Of Report ---

**Figure S17.** Expansion of HRMS for compound **Pd(L<sub>ref</sub>)<sub>2</sub>Cl**

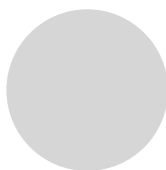

## Mass Spectrometry Facility Department of Chemistry

### Analysis Info

Analysis Name: T:\Service\200710\_0\_A3\_000001.d  
Method: MALDI\_DCTB\_1k\_new  
Sample Name: YH-58-5  
Comment: Y. Hou, R. Tykwinski, DCTB as matrix, 9.4T FTICR MS

Acquisition Date: 10/07/2020 9:14:29 AM  
Instrument: apex-Qe  
Operator:

### Acquisition Parameter

Ionisation Mode: Positive MALDI Mode: n/a

### Generate Molecular Formula Parameter

Formula, min.: C99  
Formula, max.: C102H122N2O0Si2Cl2Pt  
Measured m/z: 1695.81 Charge: 1 Tolerance: 2 ppm  
Check Valence: no Min.: 0 Max.: 0  
Nitrogen Rule: no  
Filter H/C Ratio: no Min.: 0 Max.: 3  
Estimate # of C: yes Electron Configuration: both

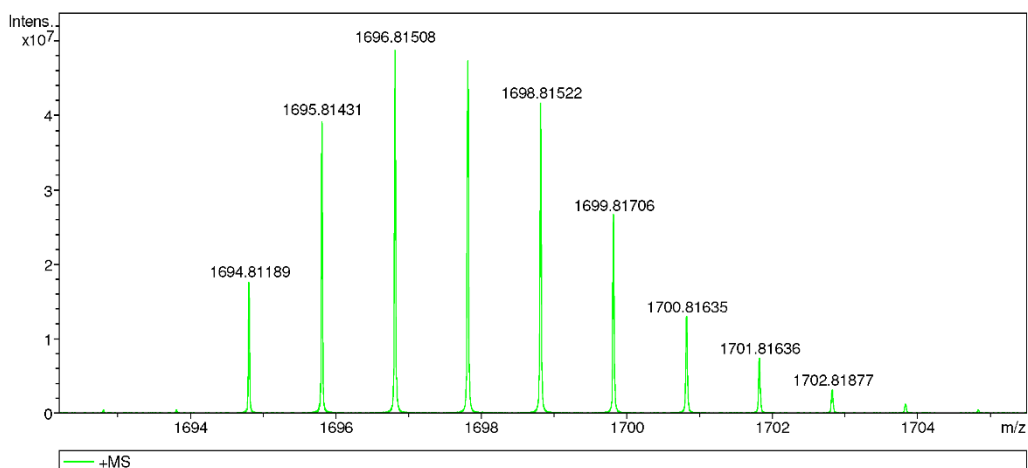

| Sum                            | Formula | Sigma | m/z        | Err [ppm] | Mean Err [ppm] | Err [mDa] | rdb   | N Rule | e <sup>-</sup> |
|--------------------------------|---------|-------|------------|-----------|----------------|-----------|-------|--------|----------------|
| C 102 H 122 Cl 2 N 2 Pt 1 Si 2 |         | 0.083 | 1695.81659 | 1.34      | 1.68           | 2.27      | 44.00 | -      | odd            |

**Figure S18.** Expansion of HRMS for compound  $\text{Pt}(\text{L}_{\text{pc}})(\text{L}_{\text{ref}})\text{Cl}_2$

## Mass Spectrometry Facility Department of Chemistry

### Analysis Info

Analysis Name: U:\Service\230623\_0\_B5\_000001.d  
 Method: MALDI\_DCTB\_mz600\_new  
 Sample Name: YH-61  
 Comment: Y. Hou, R. Tykwinski, DCTB as matrix, 9.4T FTICR MS

Acquisition Date: 6/23/2023 2:34:43 PM  
 Instrument: apex-Qe  
 Operator:

### Acquisition Parameter

Ionisation Mode: Positive      MALDI Mode: n/a

### Generate Molecular Formula Parameter

Formula, min.: C89  
 Formula, max.: N2O0Si2Cl2Pd  
 Measured m/z: 1606.75      Charge: 1      Tolerance: 2 mDa  
 Check Valence: yes      Min.: 0      Max.: 100  
 Nitrogen Rule: no  
 Filter H/C Ratio: no      Min.: 0      Max.: 3  
 Estimate # of C: yes      Electron Configuration: both

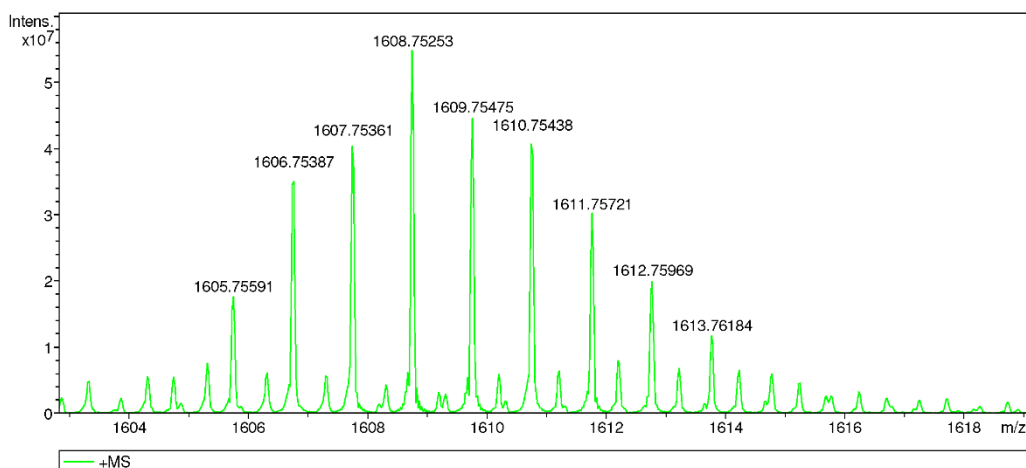

|   | Sum Formula                  | Sigma | m/z        | Err [ppm] | Mean Err [ppm] | Err [mDa] | rdb   | N Rule | e <sup>-</sup> |
|---|------------------------------|-------|------------|-----------|----------------|-----------|-------|--------|----------------|
| C | 102 H 122 Cl 2 N 2 Pd 1 Si 2 | 0.036 | 1606.75529 | 0.88      | 1.66           | 1.42      | 44.00 | ok     | odd            |
| C | 113 H 110 Cl 2 N 1 Si 2      | 0.147 | 1606.75484 | 0.60      | 1.51           | 0.96      | 60.50 | ok     | even           |

**Figure S19.** Expansion of HRMS for compound  $\text{Pd}(\text{L}_{\text{pc}})(\text{L}_{\text{ref}})\text{Cl}_2$

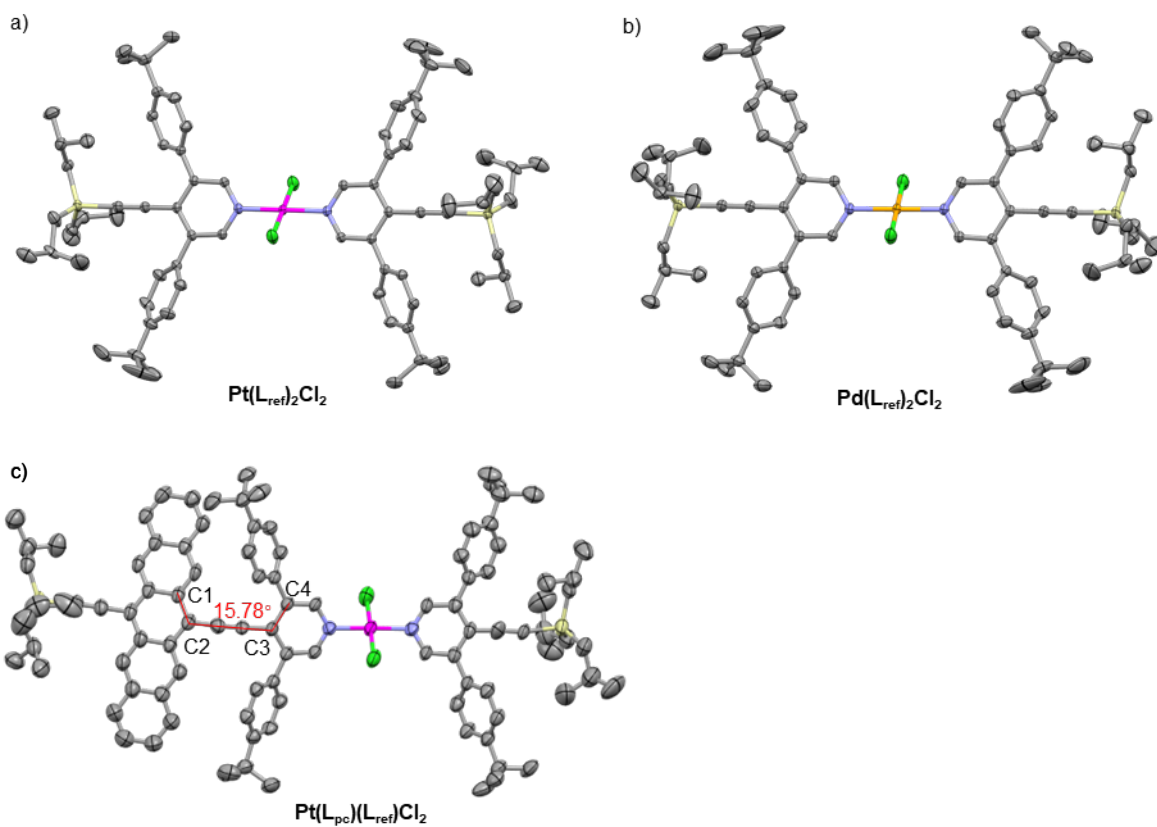

**Figure S20.** ORTEP drawing of a) **Pd(L<sub>ref</sub>)<sub>2</sub>Cl<sub>2</sub>**, b) **Pt(L<sub>ref</sub>)<sub>2</sub>Cl<sub>2</sub>**, and c) **Pt(L<sub>ref</sub>)(L<sub>pc</sub>)Cl<sub>2</sub>** with torsion angle of C1–C2–C3–C4.



## Photophysical Characterization

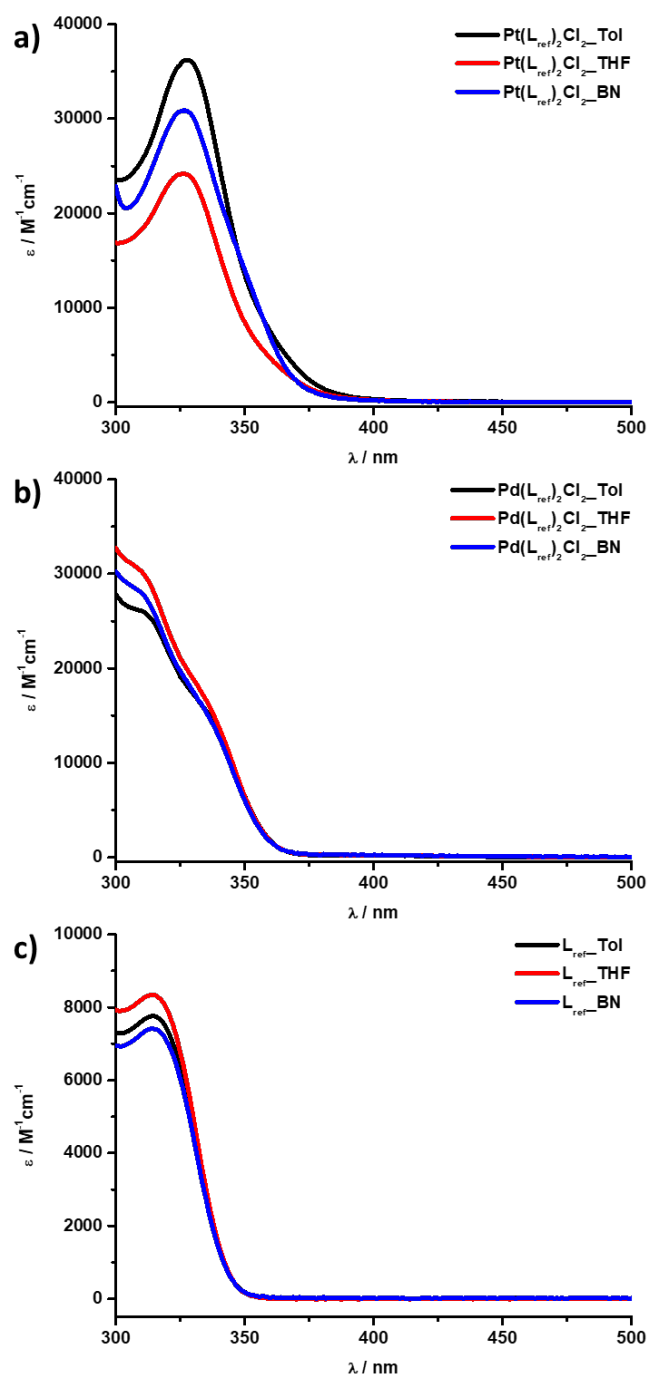

**Figure S21.** Steady-state absorption spectra of a)  $\text{Pt}(\text{L}_{\text{ref}})_2\text{Cl}_2$ , b)  $\text{Pd}(\text{L}_{\text{ref}})_2\text{Cl}_2$ , and c)  $\text{L}_{\text{ref}}$  in Tol (black), THF (red), and BN (blue).

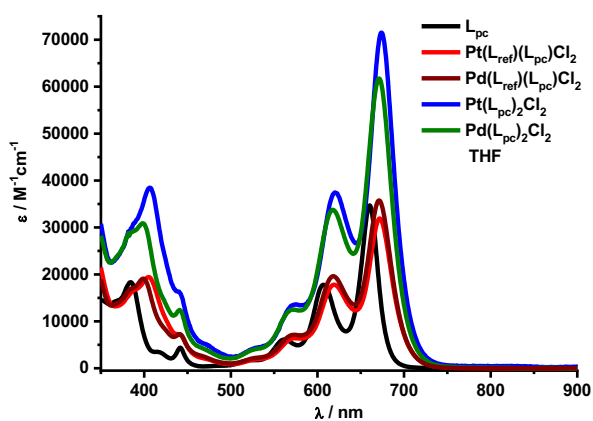

**Figure S22.** Steady-state absorption spectra of  $L_{pc}$  (black),  $Pt(L_{pc})(L_{ref})Cl_2$  (red),  $Pd(L_{pc})(L_{ref})Cl_2$  (brown),  $Pt(L_{pc})_2Cl_2$  (blue), and  $Pd(L_{pc})_2Cl_2$  (green) in THF.

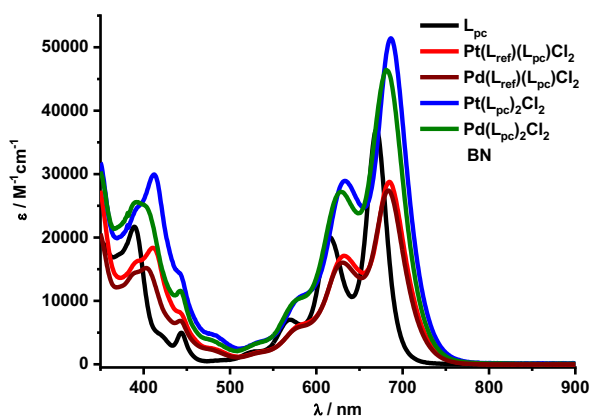

**Figure S23.** Steady-state absorption spectra of  $L_{pc}$  (black),  $Pt(L_{pc})(L_{ref})Cl_2$  (red),  $Pd(L_{pc})(L_{ref})Cl_2$  (brown),  $Pt(L_{pc})_2Cl_2$  (blue), and  $Pd(L_{pc})_2Cl_2$  (green) in BN.

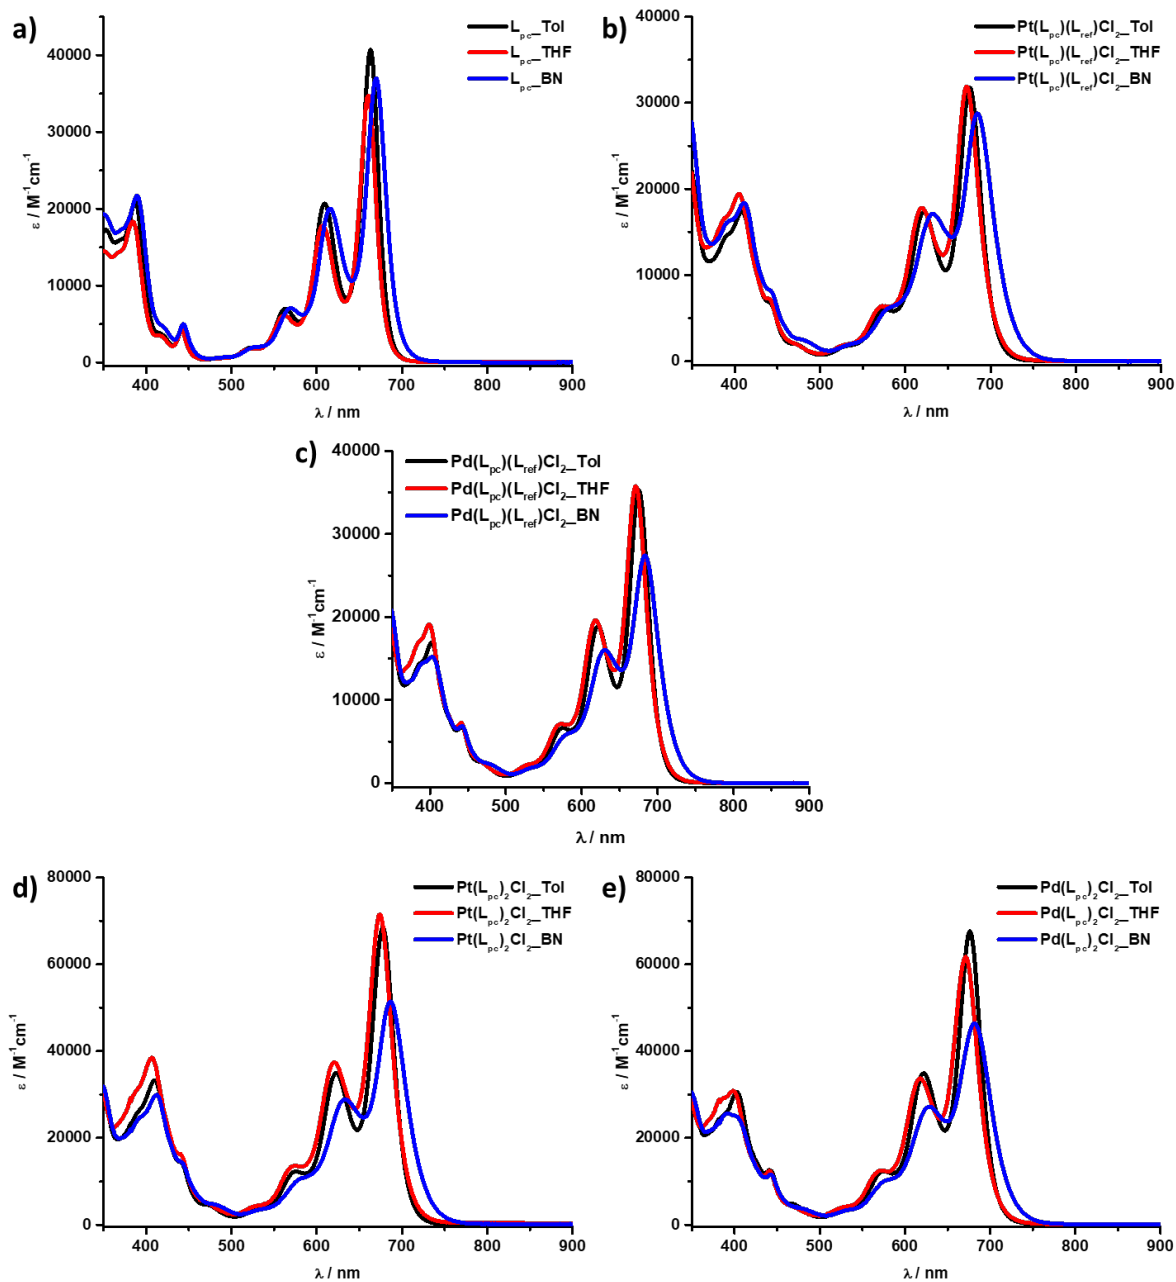

**Figure S24.** Steady-state absorption spectra of a)  $L_{pc}$ , b)  $\text{Pt}(L_{pc})(L_{ref})\text{Cl}_2$ , c)  $\text{Pd}(L_{pc})(L_{ref})\text{Cl}_2$ , d)  $\text{Pt}(L_{pc})_2\text{Cl}_2$ , and e)  $\text{Pd}(L_{pc})_2\text{Cl}_2$  in Tol (black), THF (red), and BN (blue).

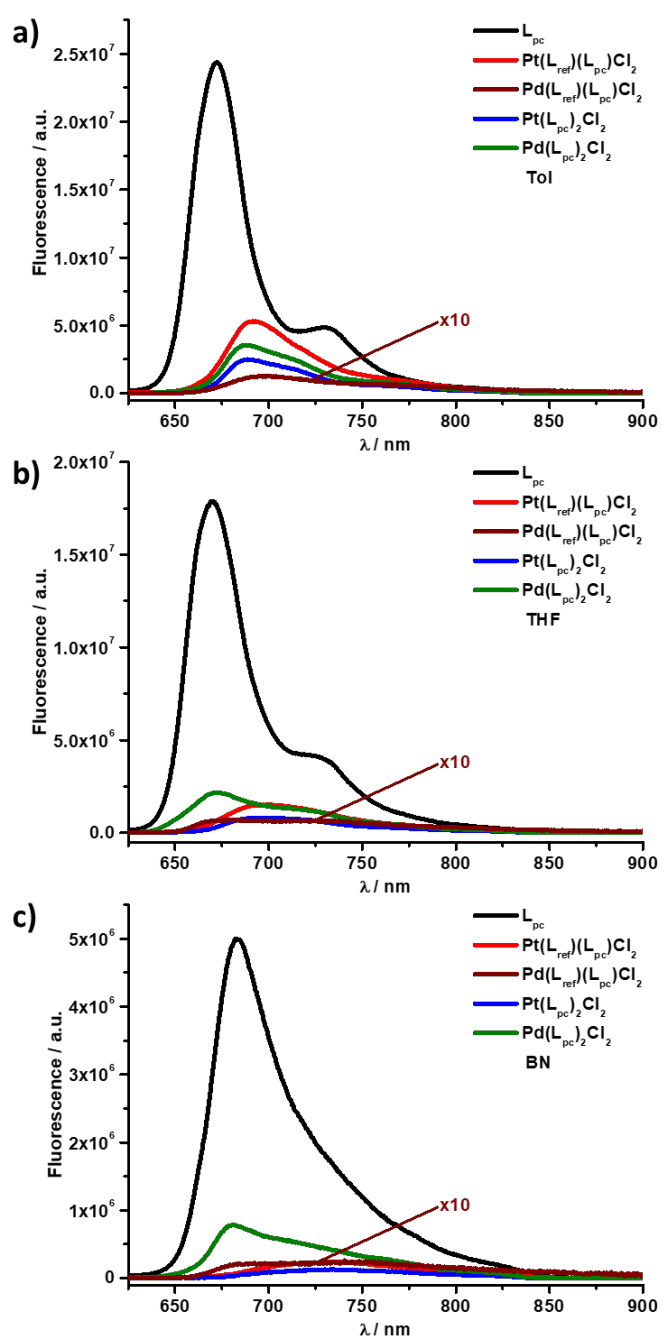

**Figure S25.** Steady-state fluorescence spectra of  $L_{pc}$  (black),  $Pt(L_{pc})(L_{ref})Cl_2$  (red),  $Pd(L_{pc})(L_{ref})Cl_2$  (brown),  $Pt(L_{pc})_2Cl_2$  (blue), and  $Pd(L_{pc})_2Cl_2$  (green) in a) Tol, b) THF, and c) BN, respectively.

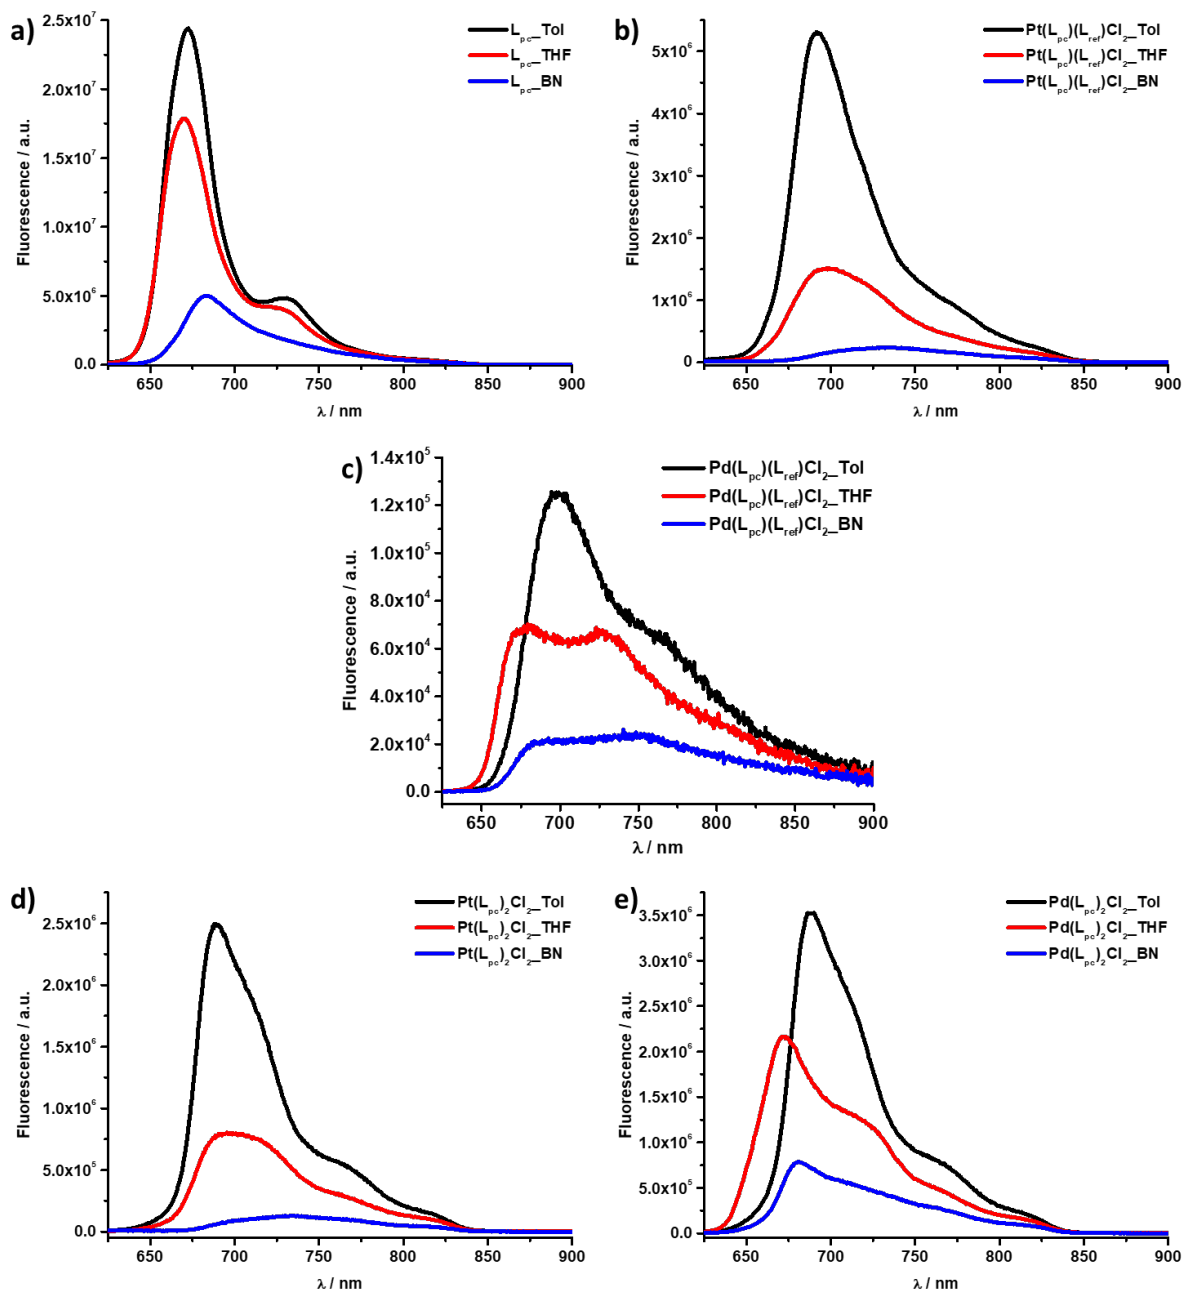

**Figure S26.** Steady-state fluorescence spectra of a)  $L_{pc}$ , b)  $Pt(L_{pc})(L_{ref})Cl_2$ , c)  $Pd(L_{pc})(L_{ref})Cl_2$ , d)  $Pt(L_{pc})_2Cl_2$ , and e)  $Pd(L_{pc})_2Cl_2$  in Tol (black), THF (red), and BN (blue), respectively.

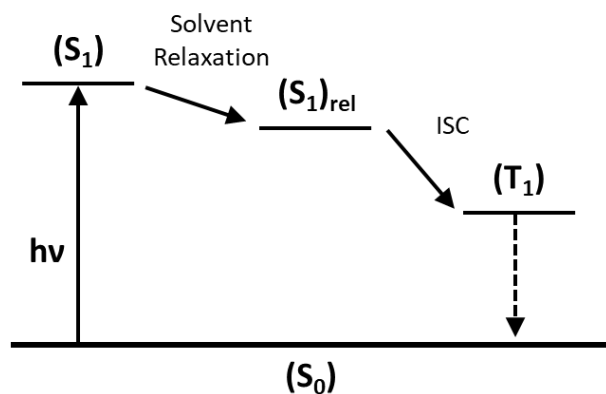

**Figure S27.** Applied kinetic model used for fitting the fsTAS and nsTAS raw data of  $L_{pc}$ ,  $Pt(L_{pc})(L_{ref})Cl_2$  and  $Pd(L_{pc})(L_{ref})Cl_2$ .

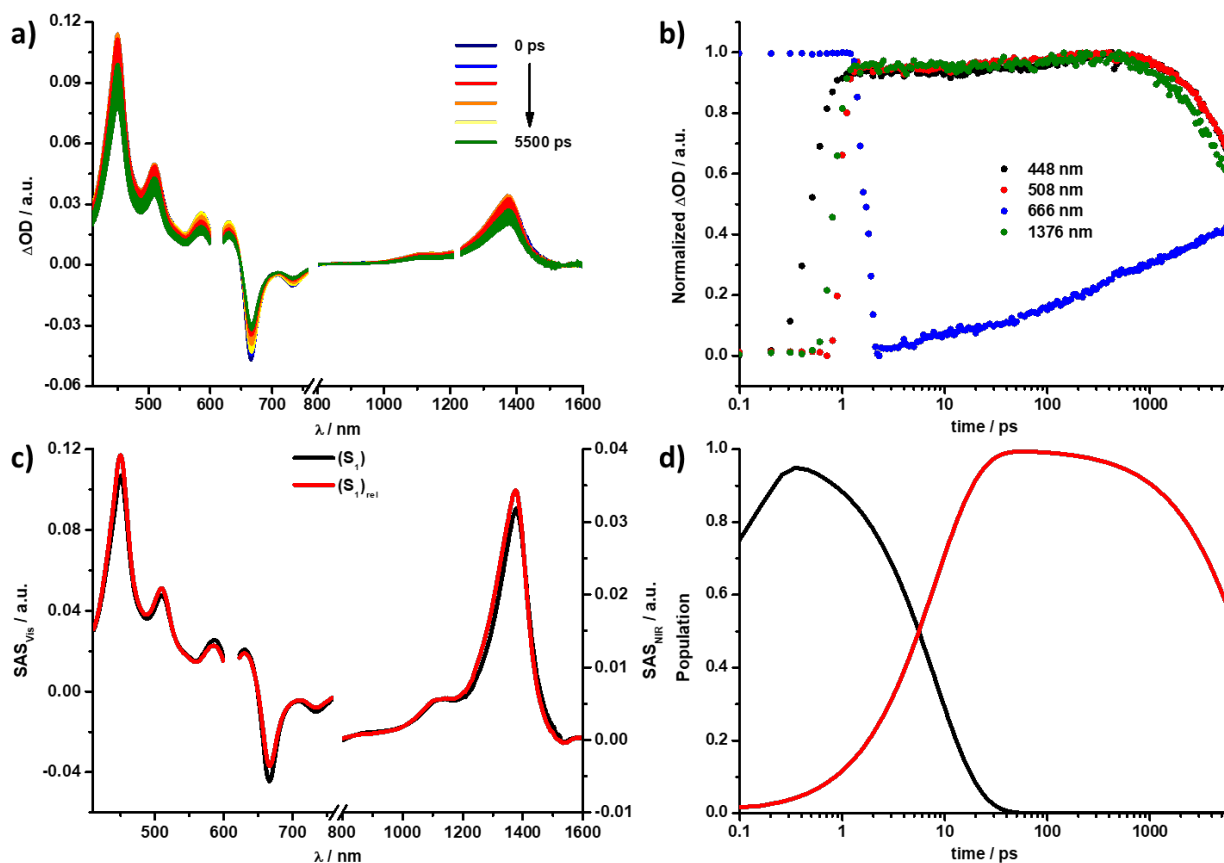

**Figure S28.** (a) fsTAS ( $\lambda_{ex} = 610$  nm, 400 nJ) of  $L_{pc}$  in Tol with time delays between 0–5 500 ps. (b) Respective normalized time absorption profiles at the illustrated wavelengths. (c) Deconvoluted fsTAS of the singlet excited state ( $S_1$ ) (black) and solvent relaxed singlet excited state ( $S_1$ )<sub>rel</sub> (red) of  $L_{pc}$  in Tol as obtained by target analysis. (d) Respective population kinetics.

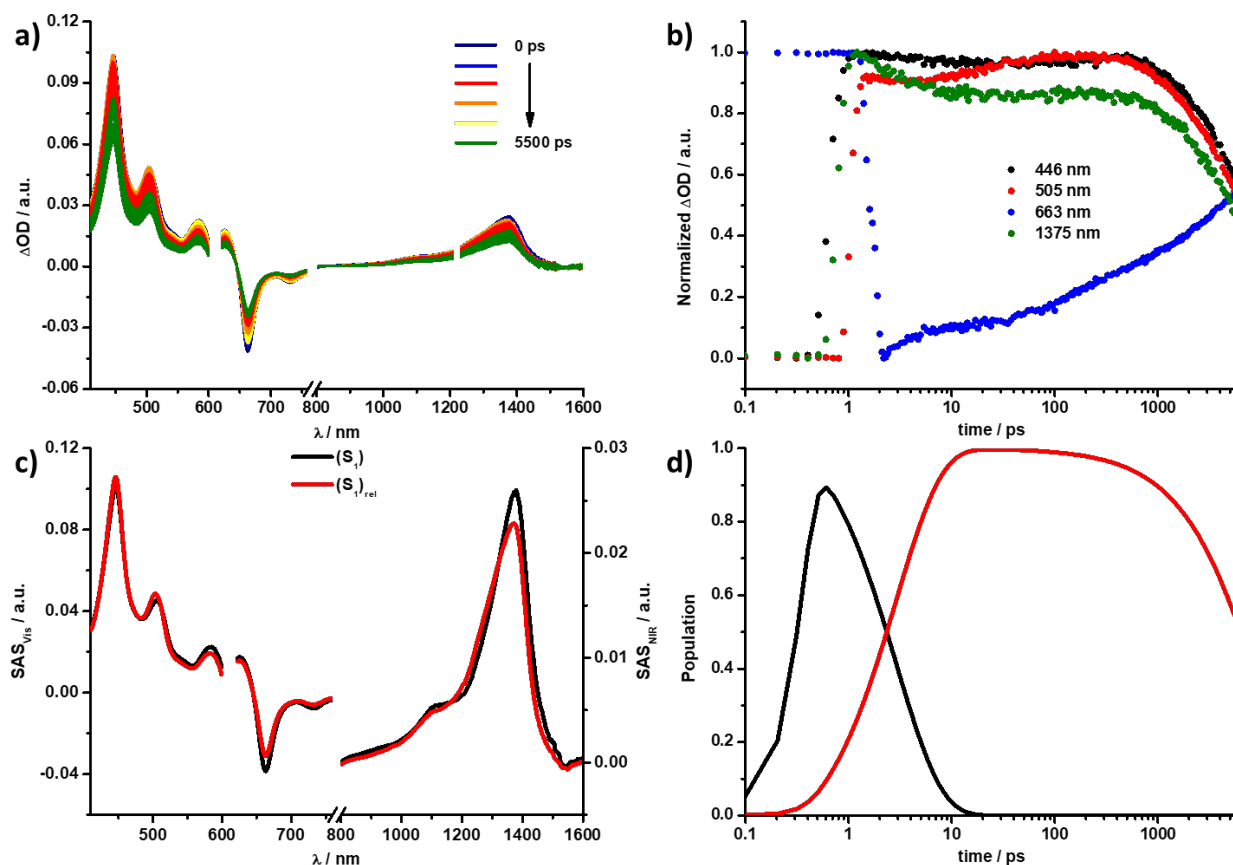

**Figure S29.** (a) fsTAS ( $\lambda_{ex} = 610$  nm, 400 nJ) of  $L_{pc}$  in THF with time delays between 0–5 500 ps. (b) Respective normalized time absorption profiles at the illustrated wavelengths. (c) Deconvoluted fsTAS of the singlet excited state ( $S_1$ ) (black) and solvent relaxed singlet excited state ( $S_1$ )<sub>rel</sub> (red) of  $L_{pc}$  in THF as obtained by target analysis. (d) Respective population kinetics.

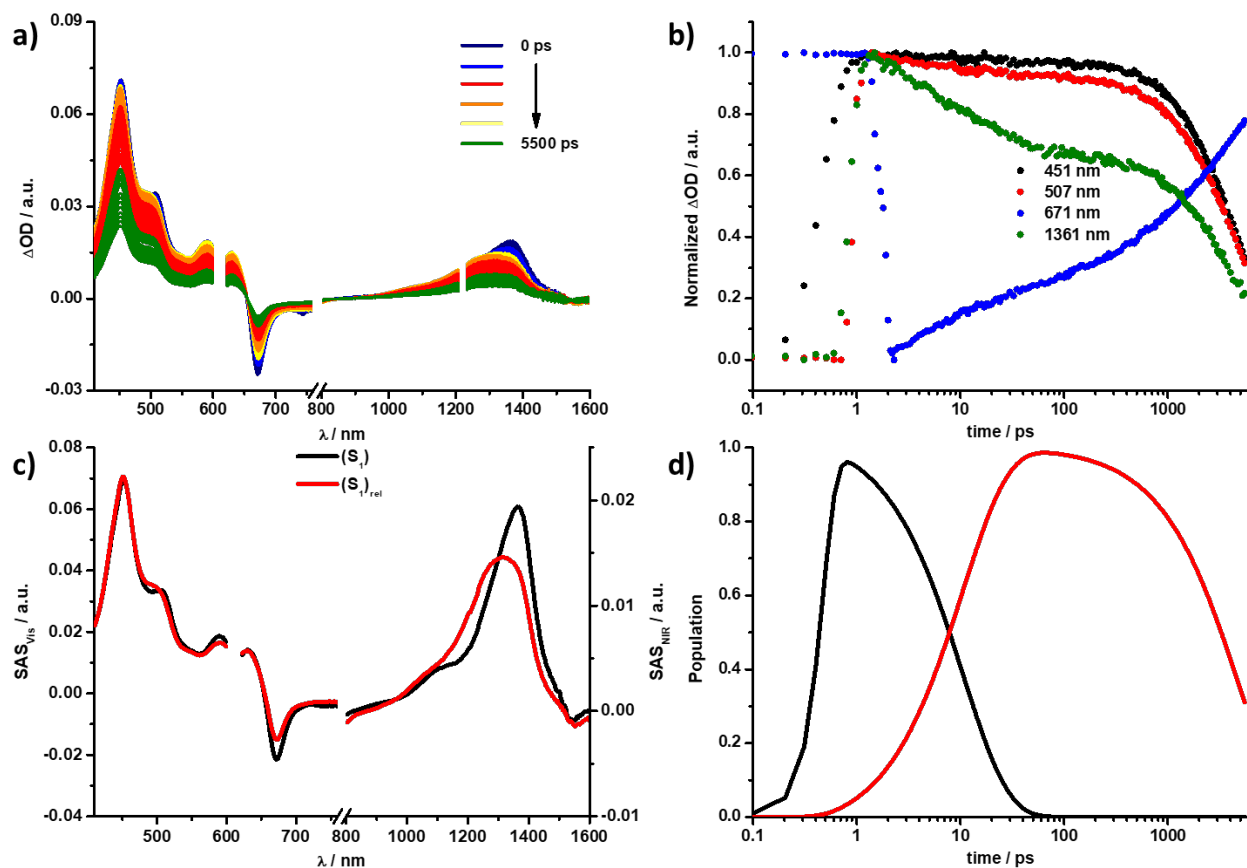

**Figure S30.** (a) fsTAS ( $\lambda_{ex} = 610$  nm, 400 nJ) of  $L_{pc}$  in BN with time delays between 0–5 500 ps. (b) Respective normalized time absorption profiles at the illustrated wavelengths. (c) Deconvoluted fsTAS of the singlet excited state ( $S_1$ ) (black) and solvent relaxed singlet excited state ( $S_1$ )<sub>rel</sub> (red) of  $L_{pc}$  in BN as obtained by target analysis. (d) Respective population kinetics.



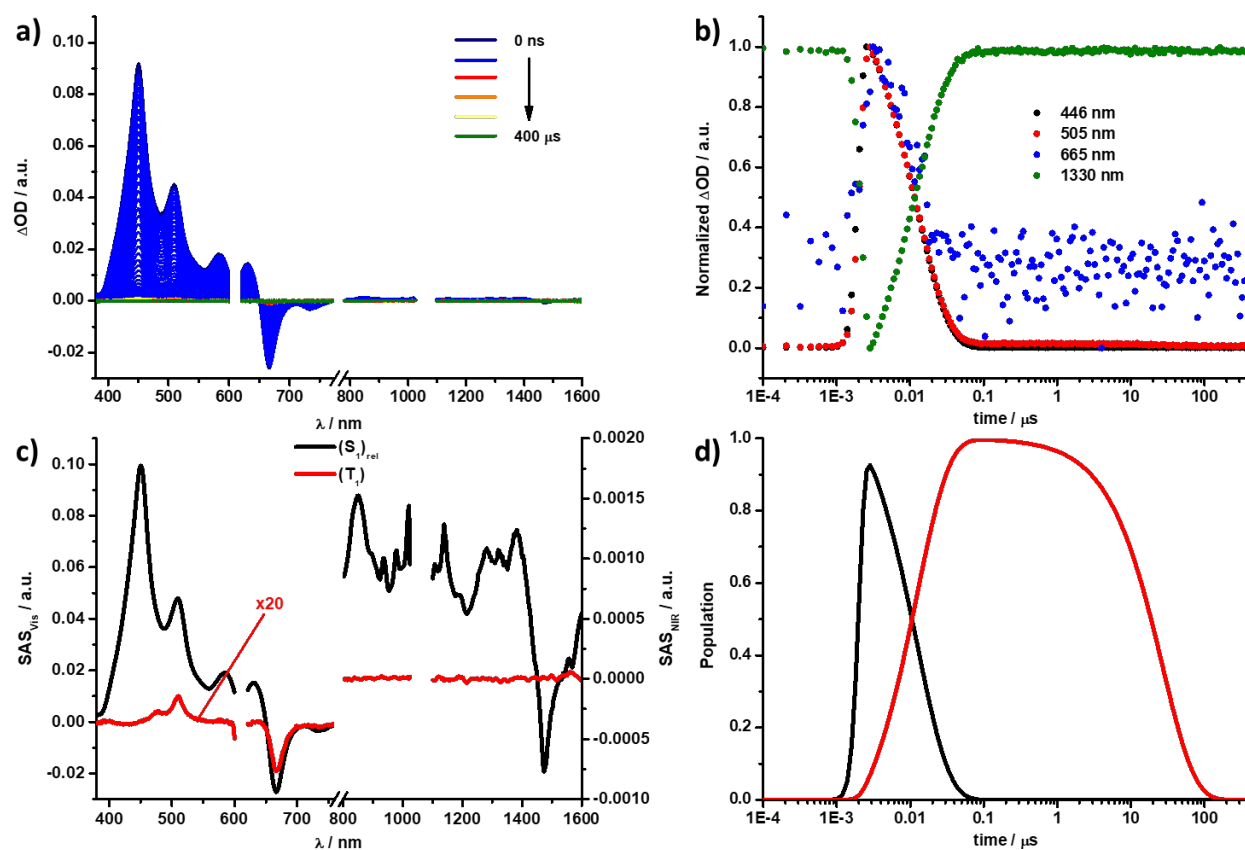

**Figure S31.** (a) nsTAS ( $\lambda_{ex} = 610$  nm, 400 nJ) of  $L_{pc}$  in Tol with time delays between 0 ns – 400  $\mu$ s. (b) Respective normalized time absorption profiles at the illustrated wavelengths. (c) Deconvoluted nsTAS of the solvent relaxed singlet excited state ( $S_1$ )<sub>rel</sub> (black) and triplet excited state ( $T_1$ ) (red) of  $L_{pc}$  in Tol as obtained by target analysis. (d) Respective population kinetics.

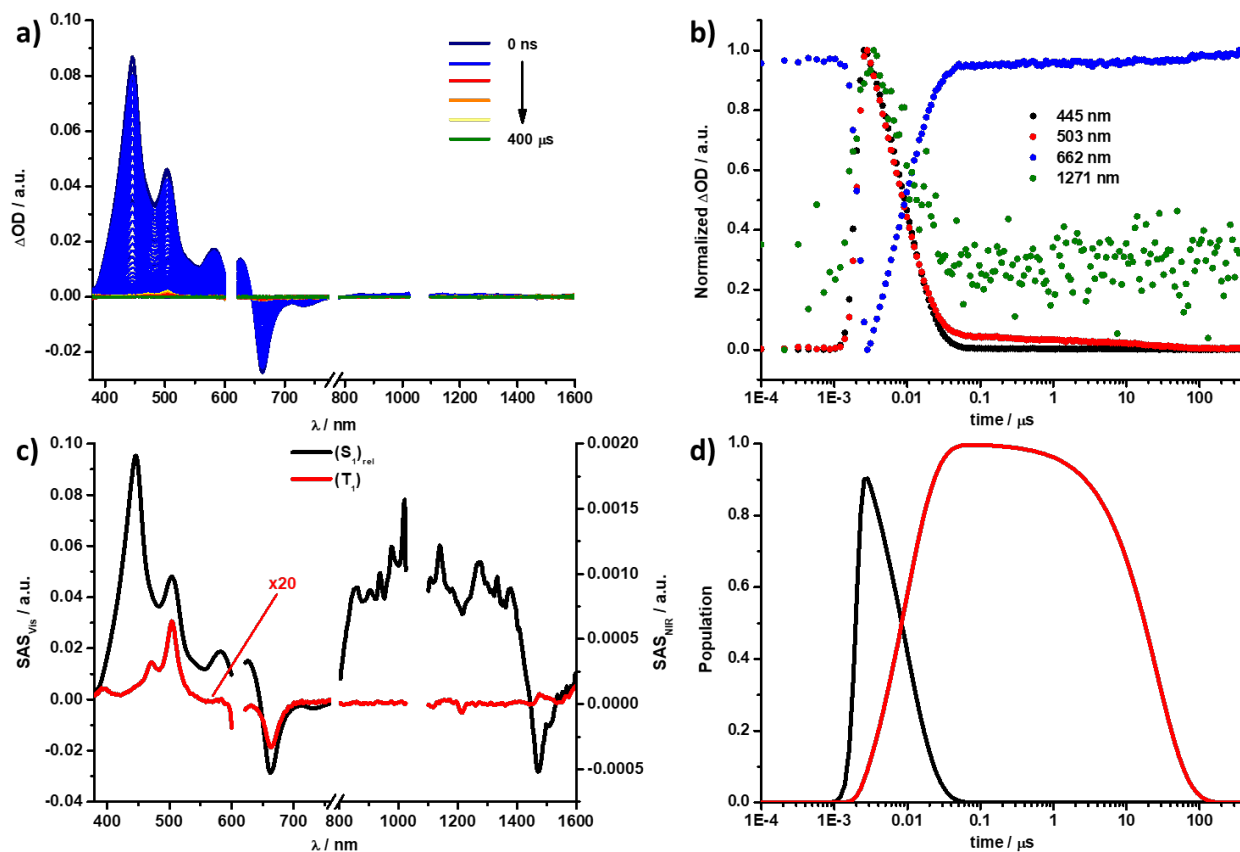

**Figure S32.** (a) nsTAS ( $\lambda_{ex} = 610$  nm, 400 nJ) of  $L_{pc}$  in THF with time delays between 0 ns – 400  $\mu s$ . (b) Respective normalized time absorption profiles at the illustrated wavelengths. (c) Deconvoluted nsTAS of the solvent relaxed singlet excited state  $(S_1)_{rel}$  (black) and triplet excited state  $(T_1)$  (red) of  $L_{pc}$  in THF as obtained by target analysis. (d) Respective population kinetics.

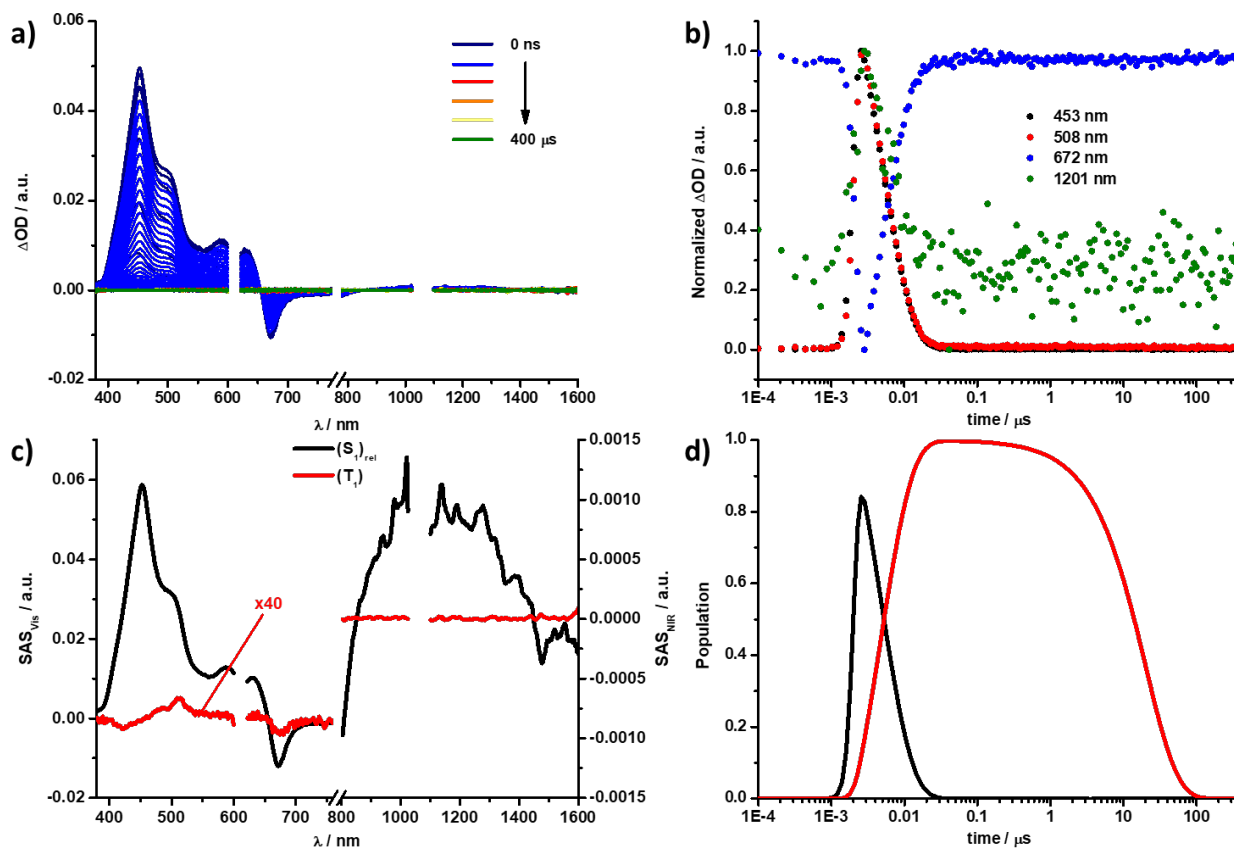

**Figure S33.** (a) nsTAS ( $\lambda_{ex} = 610$  nm, 400 nJ) of  $L_{pc}$  in BN with time delays between 0 ns – 400  $\mu$ s. (b) Respective normalized time absorption profiles at the illustrated wavelengths. (c) Deconvoluted nsTAS of the solvent relaxed singlet excited state ( $S_1$ )<sub>rel</sub> (black) and triplet excited state ( $T_1$ ) (red) of  $L_{pc}$  in BN as obtained by target analysis. (d) Respective population kinetics.

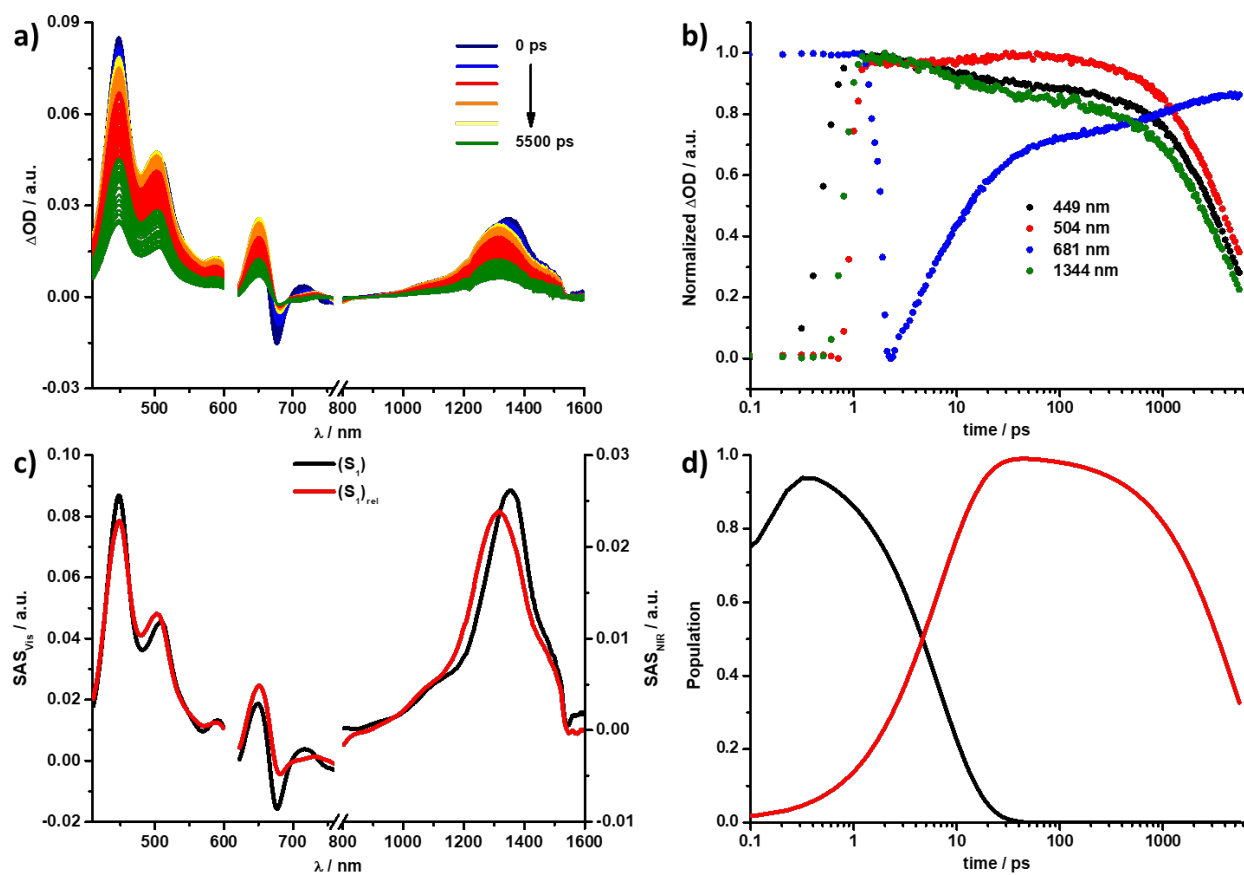

**Figure S34.** (a) fsTAS ( $\lambda_{\text{ex}} = 610$  nm, 400 nJ) of  $\text{Pt}(\text{L}_{\text{pc}})(\text{L}_{\text{ref}})\text{Cl}_2$  in Tol with time delays between 0–5 500 ps. (b) Respective normalized time absorption profiles at the illustrated wavelengths. (c) Deconvoluted fsTAS of the singlet excited state ( $S_1$ ) (black) and solvent relaxed singlet excited state ( $S_1$ )<sub>rel</sub> (red) of  $\text{Pt}(\text{L}_{\text{pc}})(\text{L}_{\text{ref}})\text{Cl}_2$  in Tol as obtained by target analysis. (d) Respective population kinetics.

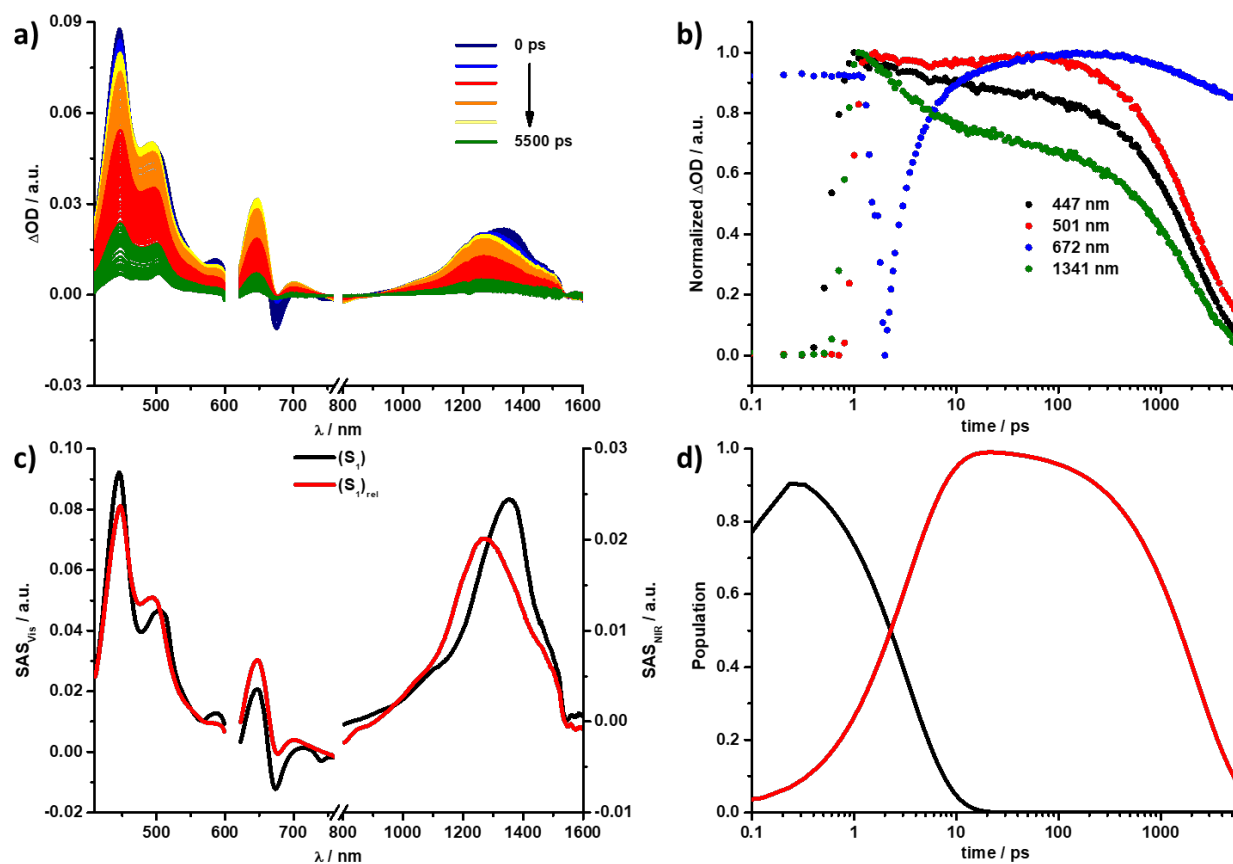

**Figure S35.** (a) fsTAS ( $\lambda_{\text{ex}} = 610 \text{ nm}$ ,  $400 \text{ nJ}$ ) of  $\text{Pt}(\text{L}_{\text{pc}})(\text{L}_{\text{ref}})\text{Cl}_2$  in THF with time delays between 0–5 500 ps. (b) Respective normalized time absorption profiles at the illustrated wavelengths. (c) Deconvoluted fsTAS of the singlet excited state ( $S_1$ ) (black) and solvent relaxed singlet excited state ( $S_{1,\text{rel}}$ ) (red) of  $\text{Pt}(\text{L}_{\text{pc}})(\text{L}_{\text{ref}})\text{Cl}_2$  in THF as obtained by target analysis. (d) Respective population kinetics.

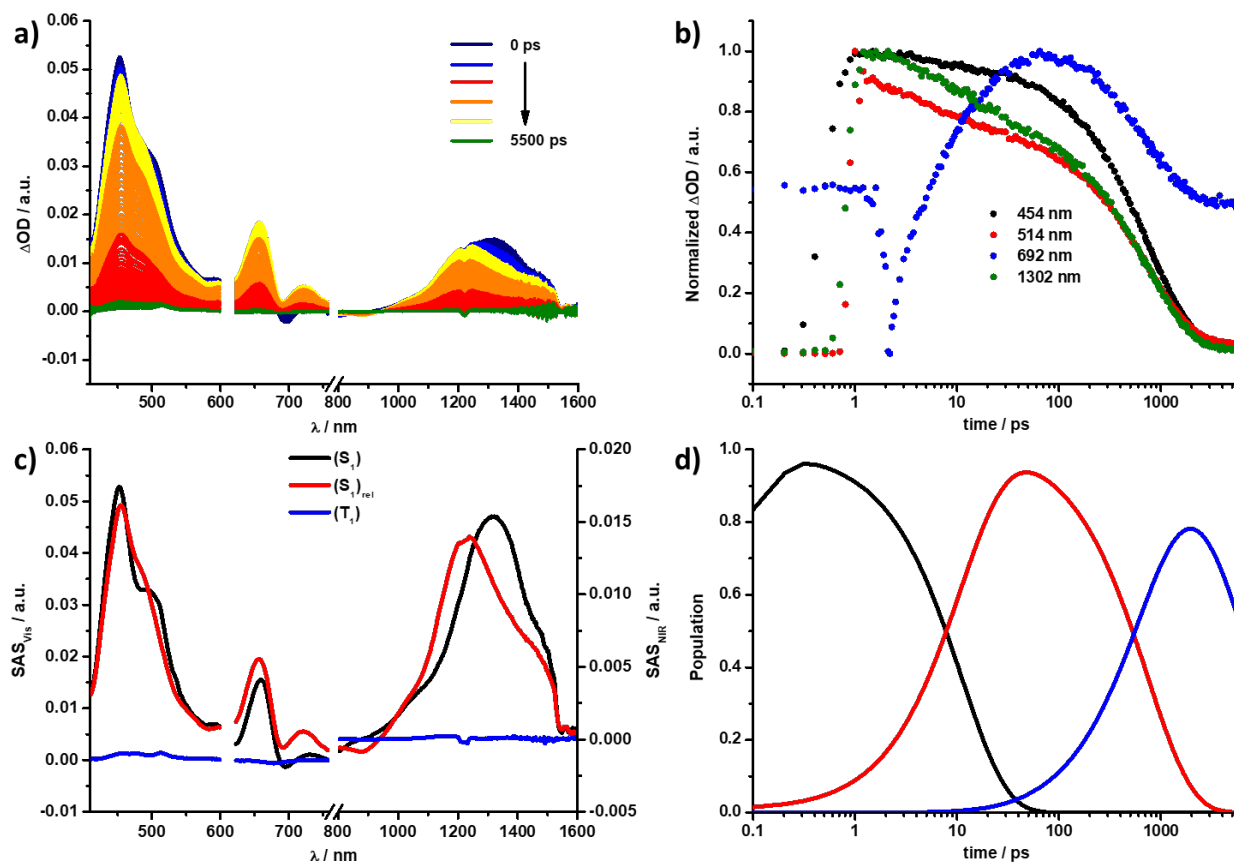

**Figure S36.** (a) fsTAS ( $\lambda_{\text{ex}} = 610 \text{ nm}$ , 400 nJ) of  $\text{Pt}(\text{L}_{\text{pc}})(\text{L}_{\text{ref}})\text{Cl}_2$  in BN with time delays between 0–5 500 ps. (b) Respective normalized time absorption profiles at the illustrated wavelengths. (c) Deconvoluted fsTAS of the singlet excited state ( $S_1$ ) (black), solvent relaxed singlet excited state ( $S_1$ )<sub>rel</sub> (red), and triplet excited state ( $T_1$ ) of  $\text{Pt}(\text{L}_{\text{pc}})(\text{L}_{\text{ref}})\text{Cl}_2$  in BN as obtained by target analysis. (d) Respective population kinetics.

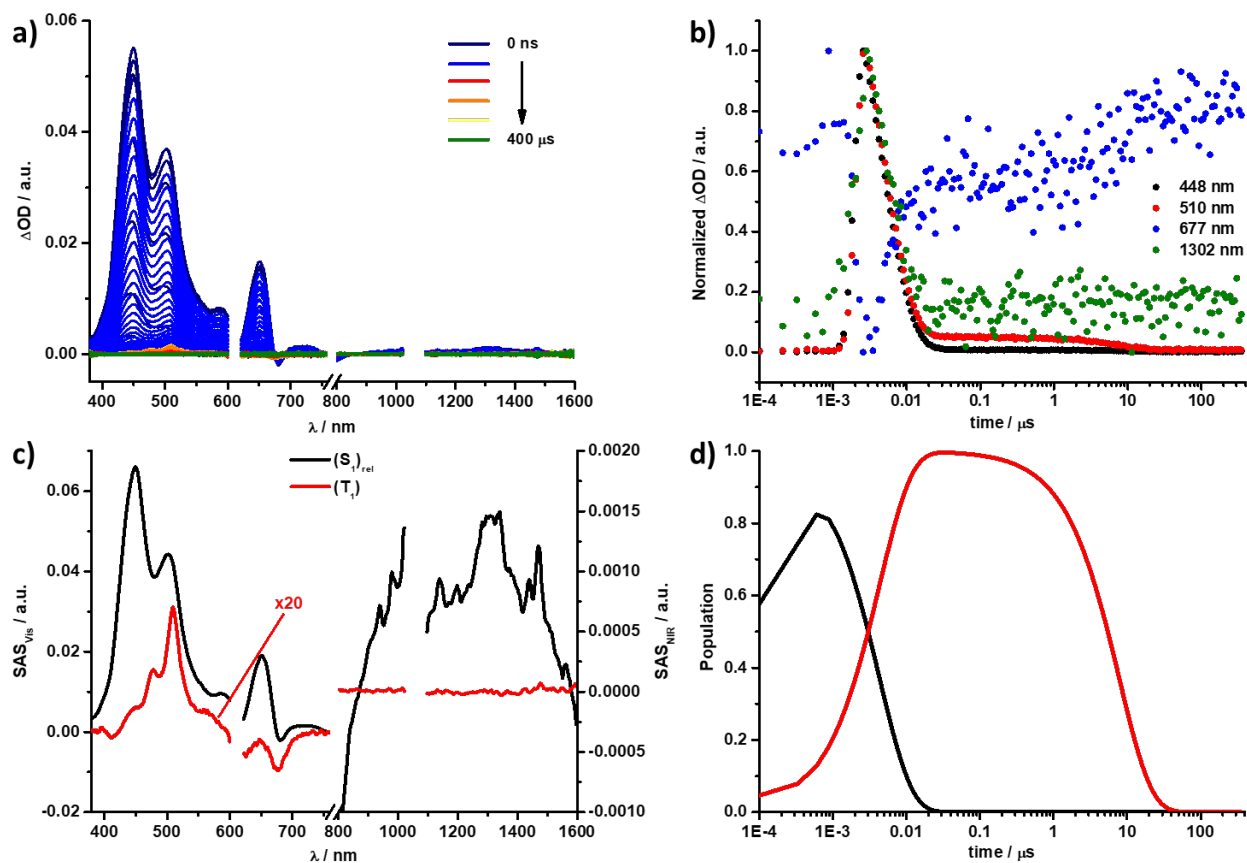

**Figure S37.** (a) nsTAS ( $\lambda_{\text{ex}} = 610 \text{ nm}$ ,  $400 \text{ nJ}$ ) of  $\text{Pt}(\text{L}_{\text{pc}})(\text{L}_{\text{ref}})\text{Cl}_2$  in Tol with time delays between  $0 \text{ ns}$  –  $400 \mu\text{s}$ . (b) Respective normalized time absorption profiles at the illustrated wavelengths. (c) Deconvoluted nsTAS of the solvent relaxed singlet excited state  $(\text{S}_1)_{\text{rel}}$  (black) and triplet excited state  $(\text{T}_1)$  (red) of  $\text{Pt}(\text{L}_{\text{pc}})(\text{L}_{\text{ref}})\text{Cl}_2$  in Tol as obtained by target analysis. (d) Respective population kinetics.

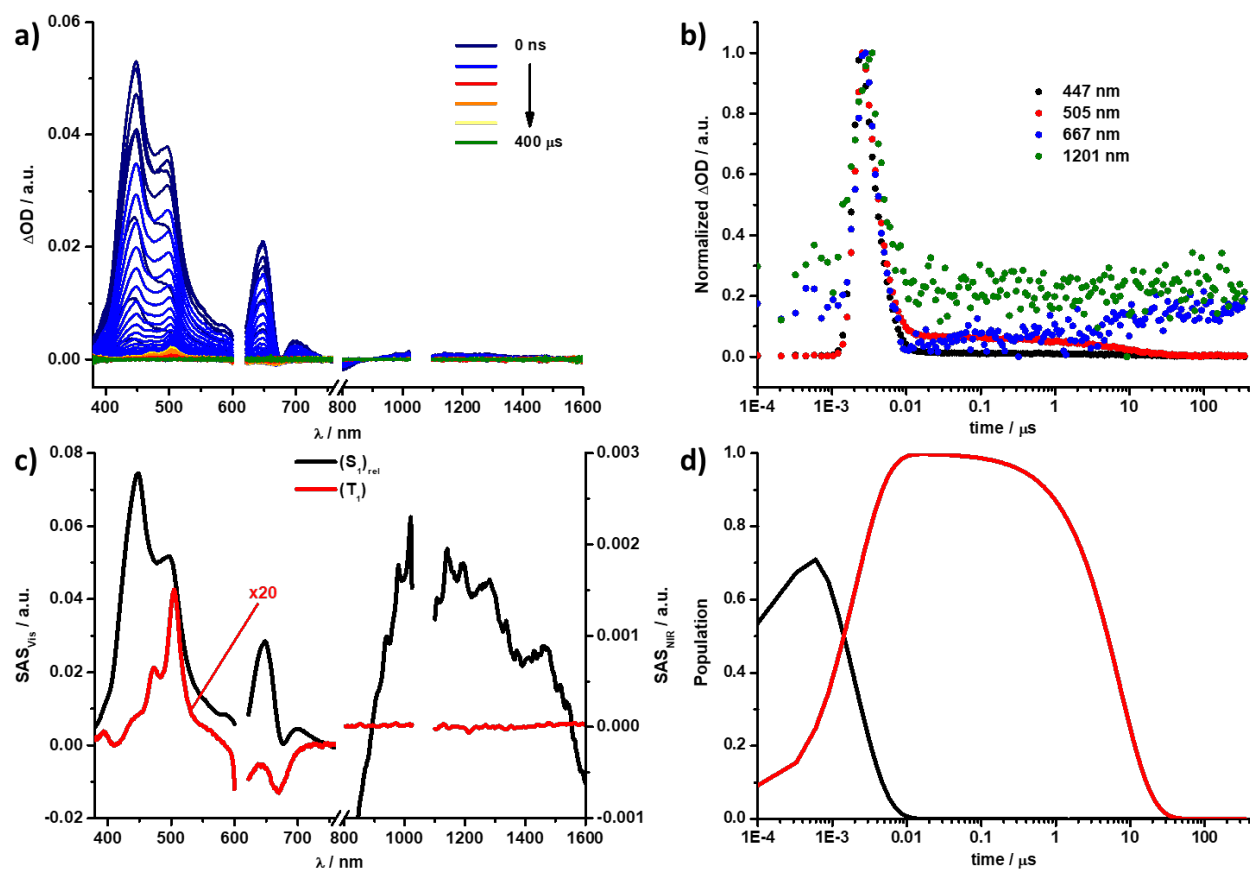

**Figure S38.** (a) nsTAS ( $\lambda_{\text{ex}} = 610 \text{ nm}$ ,  $400 \text{ nJ}$ ) of  $\text{Pt}(\text{L}_{\text{pc}})(\text{L}_{\text{ref}})\text{Cl}_2$  in THF with time delays between 0 ns – 400  $\mu\text{s}$ . (b) Respective normalized time absorption profiles at the illustrated wavelengths. (c) Deconvoluted nsTAS of the solvent relaxed singlet excited state ( $(\text{S}_1)_{\text{rel}}$ ) (black) and triplet excited state ( $\text{T}_1$ ) (red) of  $\text{Pt}(\text{L}_{\text{pc}})(\text{L}_{\text{ref}})\text{Cl}_2$  in THF as obtained by target analysis. (d) Respective population kinetics.



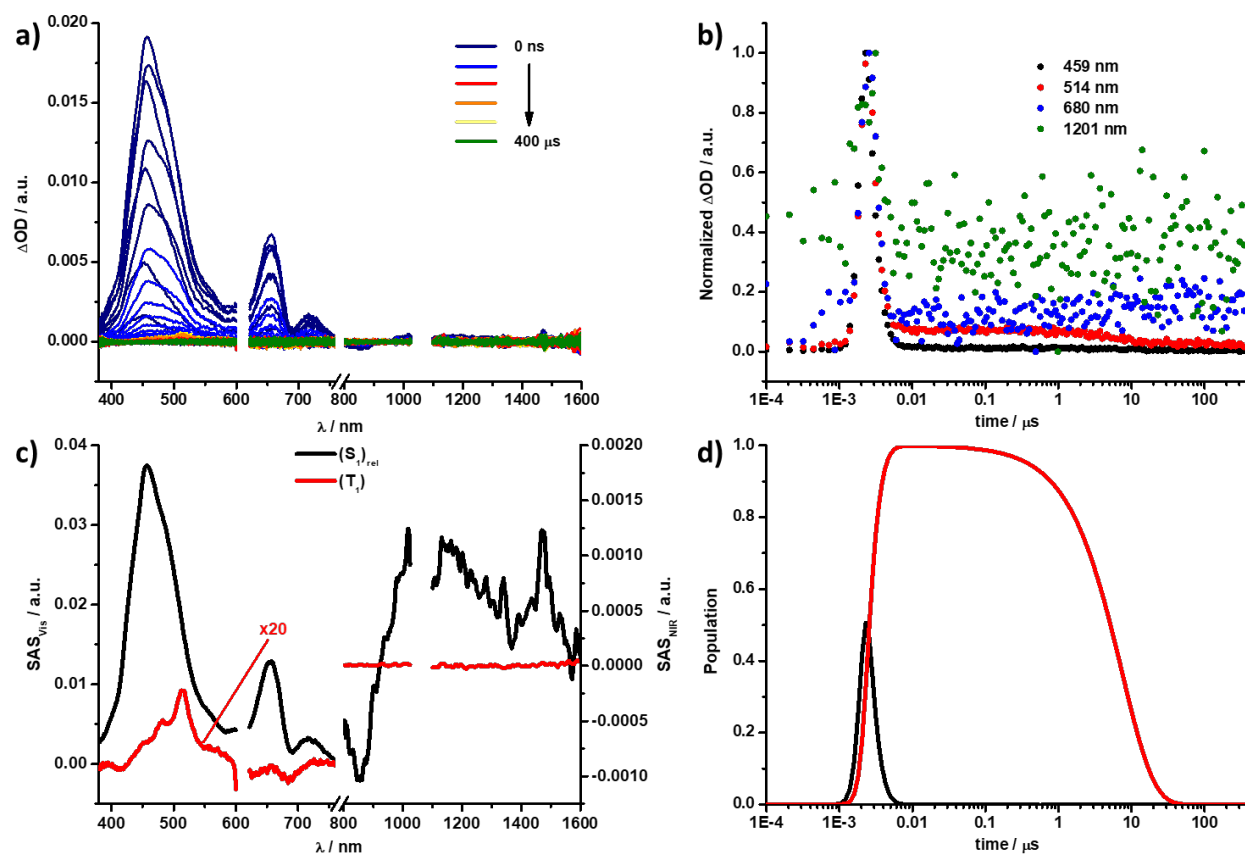

**Figure S39.** (a) nsTAS ( $\lambda_{\text{ex}} = 610 \text{ nm}$ , 400 nJ) of  $\text{Pt}(\text{L}_{\text{pc}})(\text{L}_{\text{ref}})\text{Cl}_2$  in BN with time delays between 0 ns – 400  $\mu\text{s}$ . (b) Respective normalized time absorption profiles at the illustrated wavelengths. (c) Deconvoluted nsTAS of the solvent relaxed singlet excited state ( $(\text{S}_1)_{\text{rel}}$ ) (black) and triplet excited state ( $\text{T}_1$ ) (red) of  $\text{Pt}(\text{L}_{\text{pc}})(\text{L}_{\text{ref}})\text{Cl}_2$  in BN as obtained by target analysis. (d) Respective population kinetics.

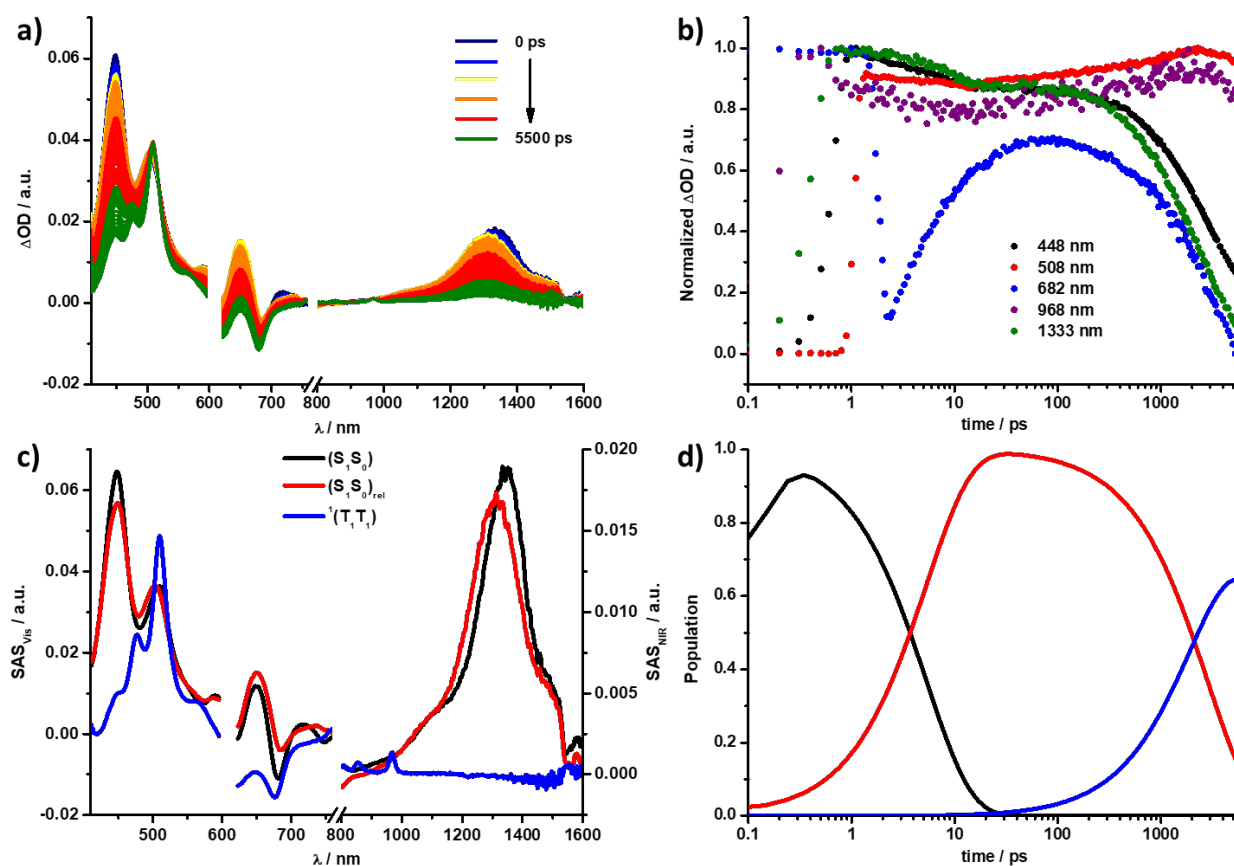

**Figure S40.** (a) fsTAS ( $\lambda_{\text{ex}} = 610$  nm, 400 nJ) of  $\text{Pt}(\text{Lpc})_2\text{Cl}_2$  in Tol with time delays between 0–5 500 ps. (b) Respective normalized time absorption profiles at the illustrated wavelengths. (c) Deconvoluted fsTAS of the singlet excited state ( $\text{S}_1\text{S}_0$ ) (black), solvent relaxed singlet excited state ( $(\text{S}_1\text{S}_0)_{\text{rel}}$ ) (red), and singlet correlated triplet pair  $^1(\text{T}_1\text{T}_1)$  (blue) of  $\text{Pt}(\text{Lpc})_2\text{Cl}_2$  in Tol as obtained by target analysis. (d) Respective population kinetics.

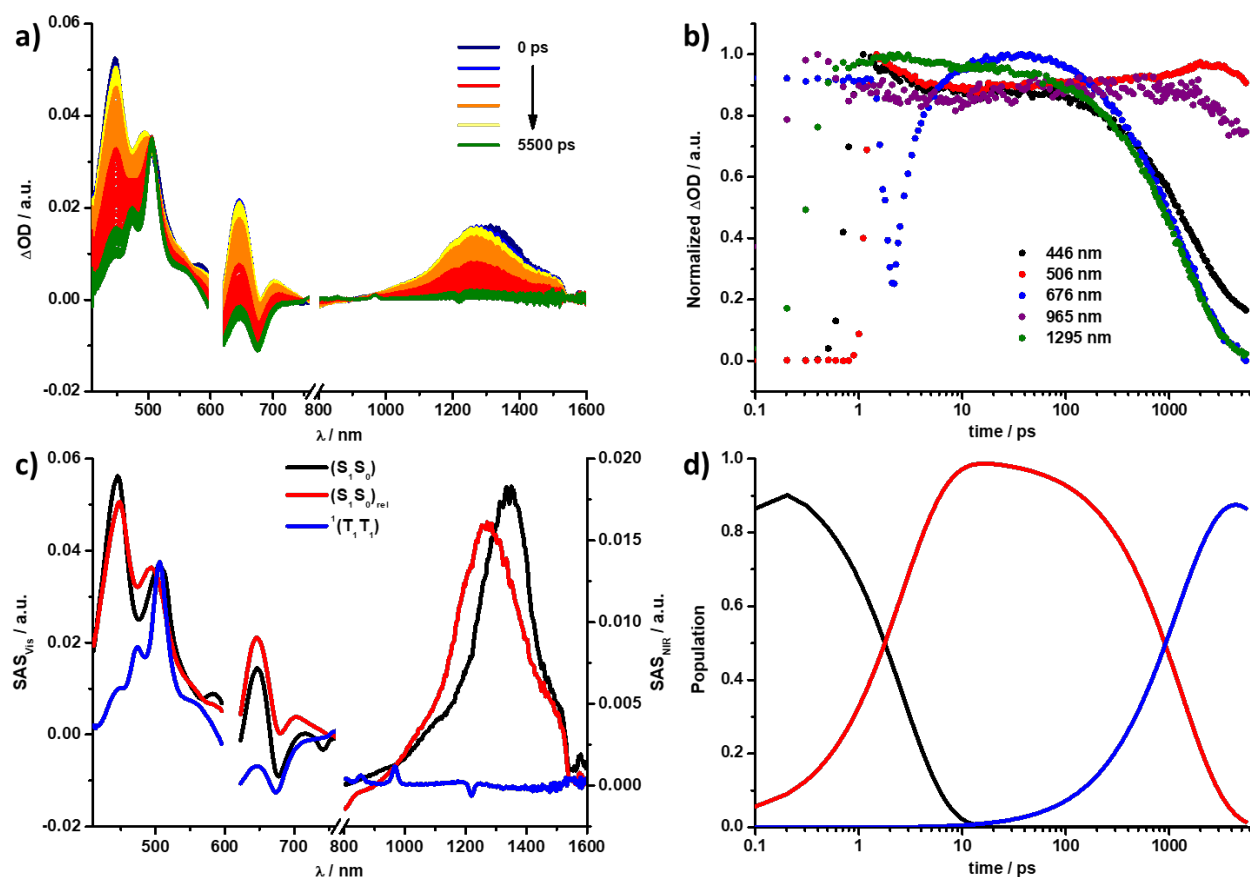

**Figure S41.** (a) fsTAS ( $\lambda_{\text{ex}} = 610 \text{ nm}$ ,  $400 \text{ nJ}$ ) of  $\text{Pt}(\text{L-PC})_2\text{Cl}_2$  in THF with time delays between 0–5 500 ps. (b) Respective normalized time absorption profiles at the illustrated wavelengths. (c) Deconvoluted fsTAS of the singlet excited state ( $S_1S_0$ ) (black), solvent relaxed singlet excited state ( $(S_1S_0)_{\text{rel}}$ ) (red), and singlet correlated triplet pair  $^1(T_1T_1)$  (blue) of  $\text{Pt}(\text{L-PC})_2\text{Cl}_2$  in THF as obtained by target analysis. (d) Respective population kinetics.

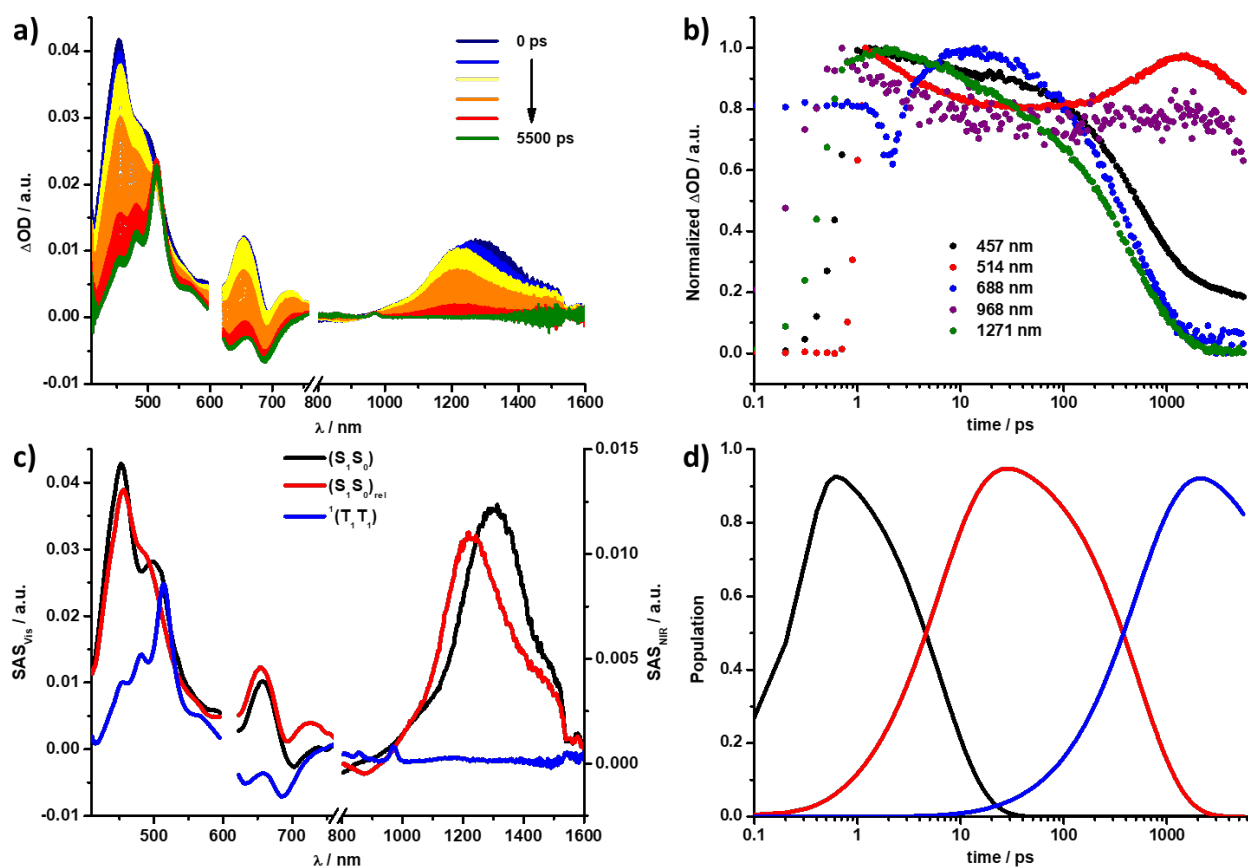

**Figure S42.** (a) fsTAS ( $\lambda_{\text{ex}} = 610 \text{ nm}$ ,  $400 \text{ nJ}$ ) of  $\text{Pt}(\text{Lpc})_2\text{Cl}_2$  in BN with time delays between 0–5 500 ps. (b) Respective normalized time absorption profiles at the illustrated wavelengths. (c) Deconvoluted fsTAS of the singlet excited state ( $S_1S_0$ ) (black), solvent relaxed singlet excited state ( $(S_1S_0)_{\text{rel}}$ ) (red), and singlet correlated triplet pair  $^1(T_1T_1)$  (blue) of  $\text{Pt}(\text{Lpc})_2\text{Cl}_2$  in BN as obtained by target analysis. (d) Respective population kinetics.

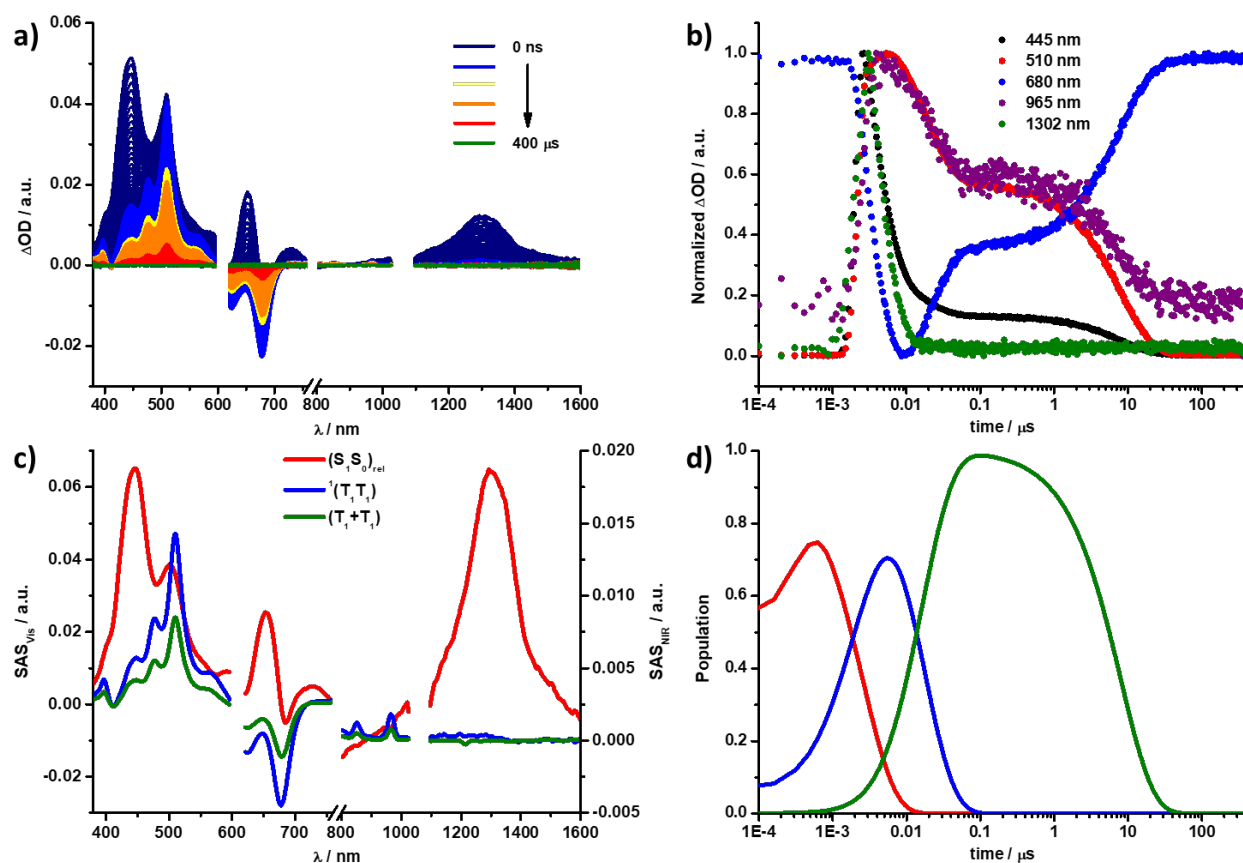

**Figure S43.** (a) nsTAS ( $\lambda_{\text{ex}} = 610 \text{ nm}$ ,  $400 \text{ nJ}$ ) of  $\text{Pt}(\text{L-pc})_2\text{Cl}_2$  in Tol with time delays between  $0 \text{ ns}$  –  $400 \mu\text{s}$ . (b) Respective normalized time absorption profiles at the illustrated wavelengths. (c) Deconvoluted nsTAS of the solvent relaxed singlet excited state  $(\text{S}_1\text{S}_0)_{\text{rel}}$  (red), singlet correlated triplet pair  ${}^1(\text{T}_1\text{T}_1)$  (blue), and uncorrelated triplet excited states  $(\text{T}_1+\text{T}_1)$  (green) of  $\text{Pt}(\text{L-pc})_2\text{Cl}_2$  in Tol as obtained by target analysis. (d) Respective population kinetics.

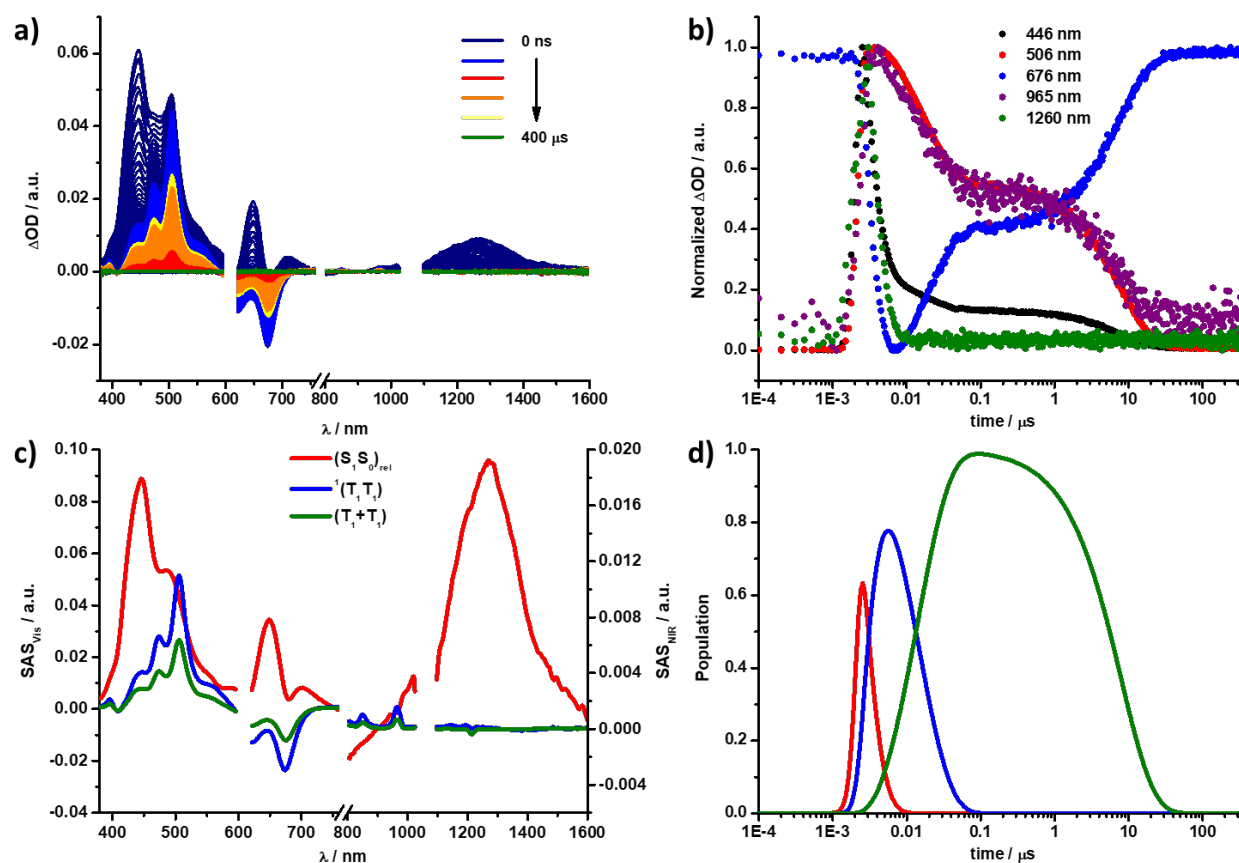

**Figure S44.** (a) nsTAS ( $\lambda_{\text{ex}} = 610 \text{ nm}$ , 400 nJ) of  $\text{Pt}(\text{L}_{\text{pc}})_2\text{Cl}_2$  in THF with time delays between 0 ns – 400  $\mu\text{s}$ . (b) Respective normalized time absorption profiles at the illustrated wavelengths. (c) Deconvoluted nsTAS of the solvent relaxed singlet excited state  $(\text{S}_1\text{S}_0)_{\text{rel}}$  (red), singlet correlated triplet pair  $^1(\text{T}_1\text{T}_1)$  (blue), and uncorrelated triplet excited states  $(\text{T}_1+\text{T}_1)$  (green) of  $\text{Pt}(\text{L}_{\text{pc}})_2\text{Cl}_2$  in THF as obtained by target analysis. (d) Respective population kinetics.

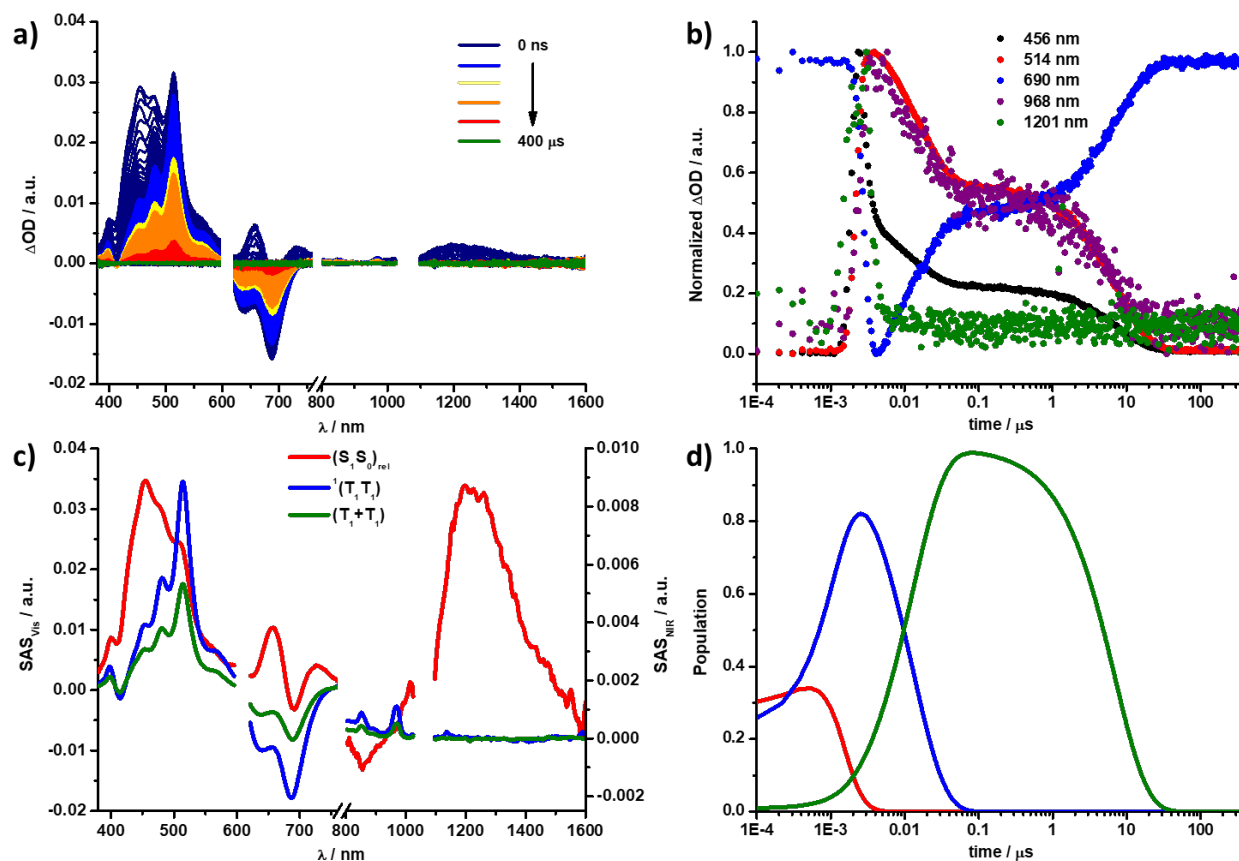

**Figure S45.** (a) nsTAS ( $\lambda_{\text{ex}} = 610 \text{ nm}$ ,  $400 \text{ nJ}$ ) of  $\text{Pt}(\text{L-pc})_2\text{Cl}_2$  in BN with time delays between  $0 \text{ ns} - 400 \mu\text{s}$ . (b) Respective normalized time absorption profiles at the illustrated wavelengths. (c) Deconvoluted nsTAS of the solvent relaxed singlet excited state  $(\text{S}_1\text{S}_0)_{\text{rel}}$  (red), singlet correlated triplet pair  ${}^1(\text{T}_1\text{T}_1)$  (blue), and uncorrelated triplet excited states  $(\text{T}_1+\text{T}_1)$  (green) of  $\text{Pt}(\text{L-pc})_2\text{Cl}_2$  in BN as obtained by target analysis. (d) Respective population kinetics.

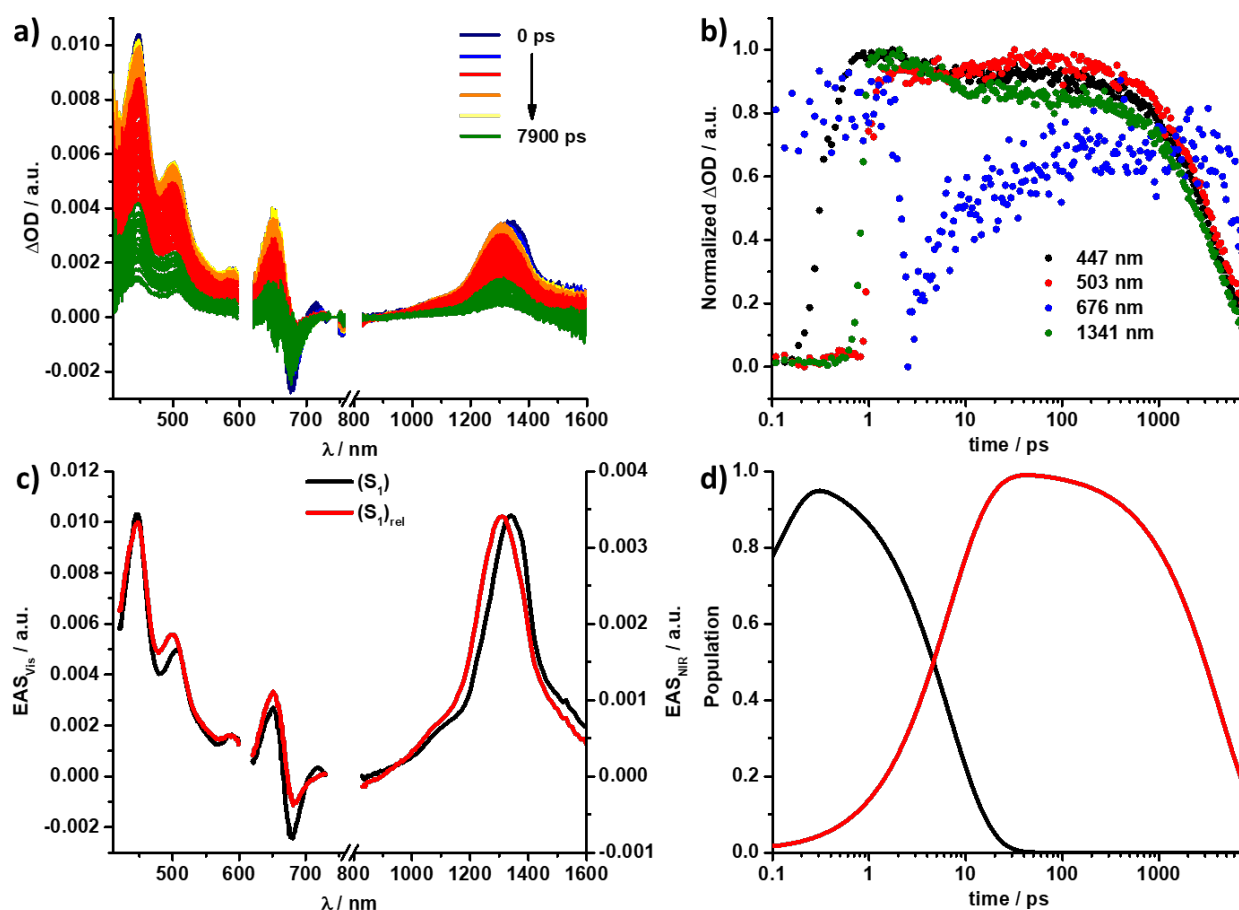

**Figure S46.** (a) fsTAS ( $\lambda_{\text{ex}} = 610 \text{ nm}$ , 400 nJ) of  $\text{Pd}(\text{L}_{\text{pc}})(\text{L}_{\text{ref}})\text{Cl}_2$  in Tol with time delays between 0–7 900 ps. (b) Respective normalized time absorption profiles at the illustrated wavelengths. (c) Deconvoluted fsTAS of the singlet excited state ( $S_1$ ) (black) and solvent relaxed singlet excited state ( $S_{1\text{rel}}$ ) (red) of  $\text{Pd}(\text{L}_{\text{pc}})(\text{L}_{\text{ref}})\text{Cl}_2$  in Tol as obtained by global analysis. (d) Respective population kinetics.



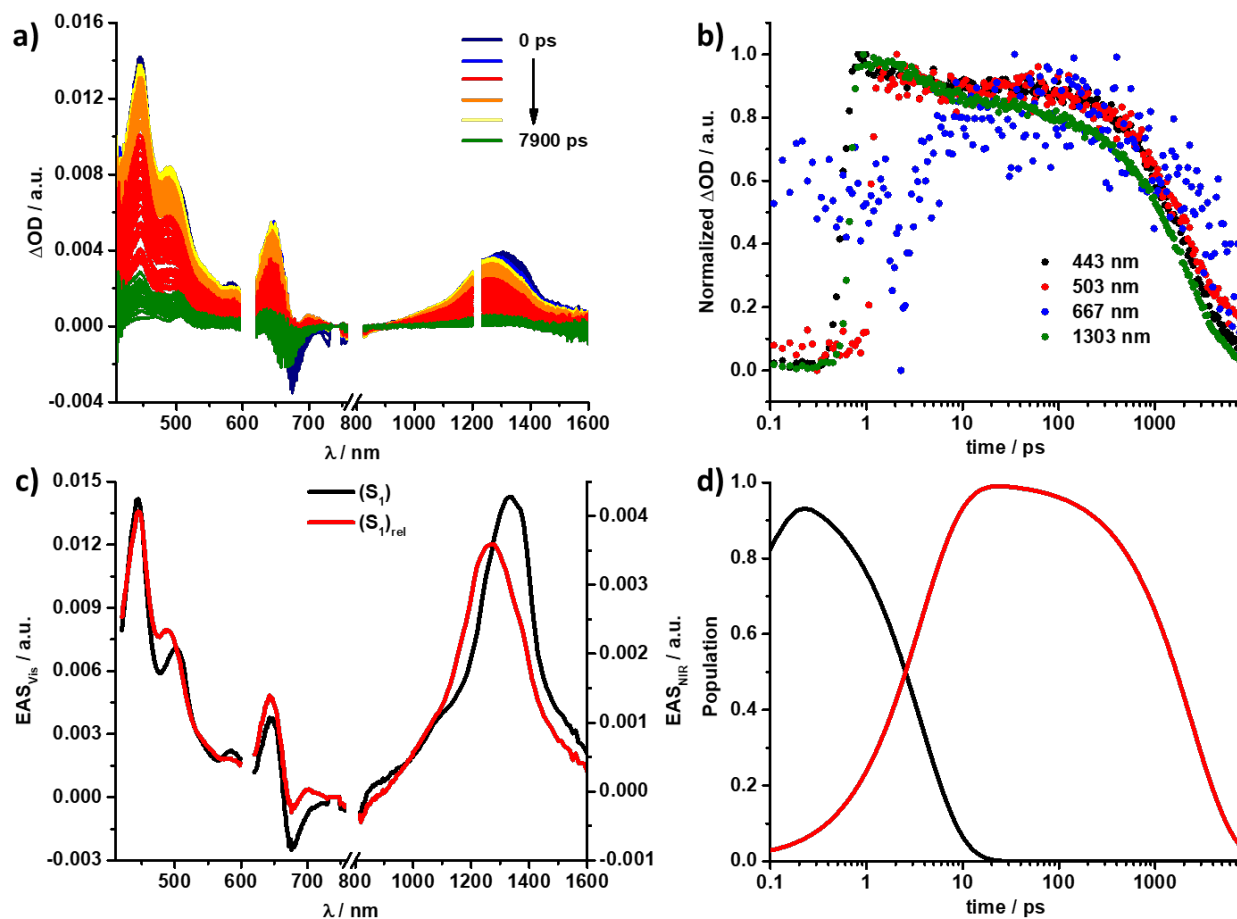

**Figure S47.** (a) fsTAS ( $\lambda_{\text{ex}} = 610$  nm, 400 nJ) of  $\text{Pd}(\text{L}_{\text{pc}})(\text{L}_{\text{ref}})\text{Cl}_2$  in THF with time delays between 0–7 900 ps. (b) Respective normalized time absorption profiles at the illustrated wavelengths. (c) Deconvoluted fsTAS of the singlet excited state ( $S_1$ ) (black) and solvent relaxed singlet excited state ( $S_{1,\text{rel}}$ ) (red) of  $\text{Pd}(\text{L}_{\text{pc}})(\text{L}_{\text{ref}})\text{Cl}_2$  in THF as obtained by global analysis. (d) Respective population kinetics.

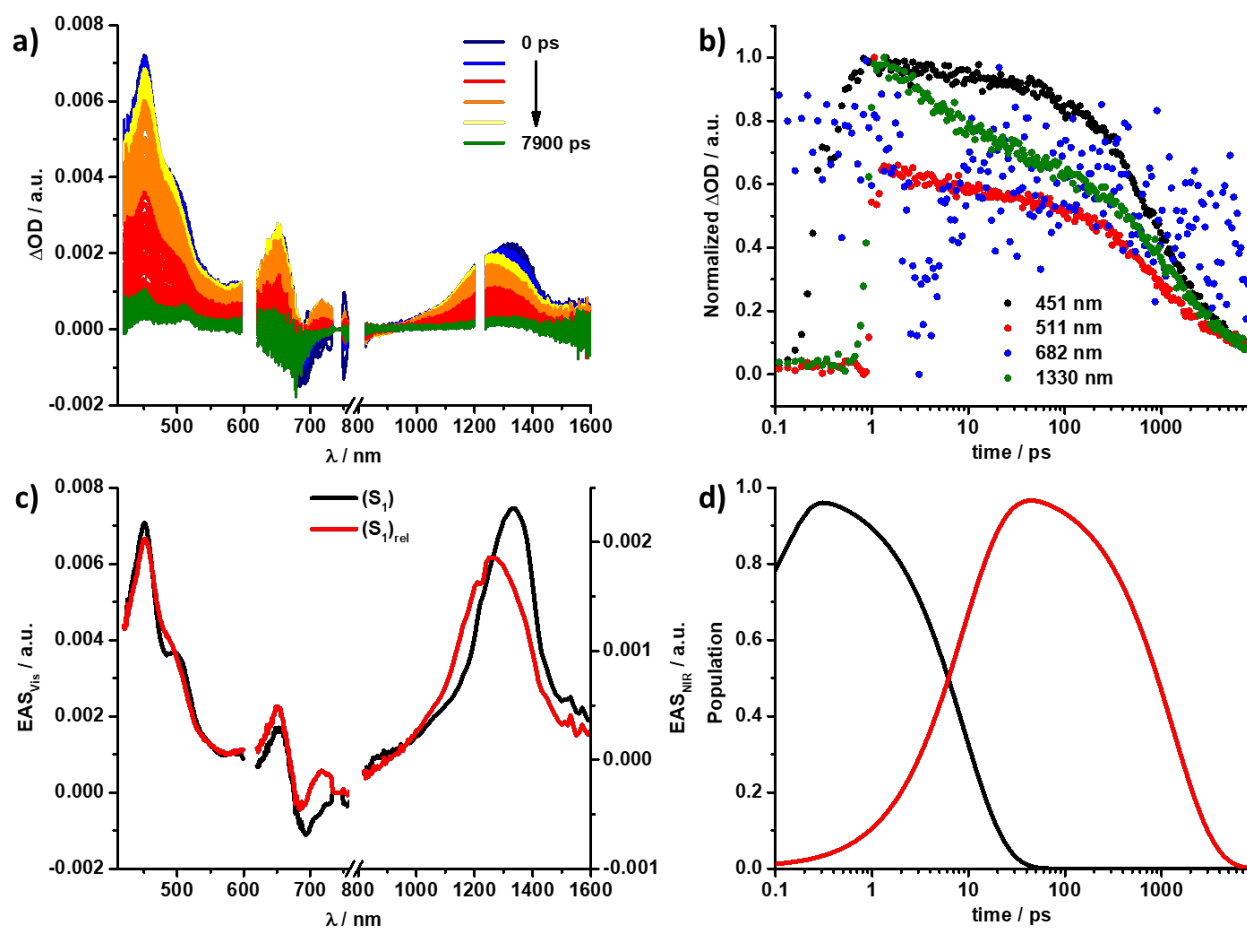

**Figure S48.** (a) fsTAS ( $\lambda_{\text{ex}} = 610 \text{ nm}$ , 400 nJ) of  $\text{Pd}(\text{L}_{\text{pc}})(\text{L}_{\text{ref}})\text{Cl}_2$  in BN with time delays between 0–7 900 ps. (b) Respective normalized time absorption profiles at the illustrated wavelengths. (c) Deconvoluted fsTAS of the singlet excited state ( $S_1$ ) (black) and solvent relaxed singlet excited state ( $S_{1,\text{rel}}$ ) (red) of  $\text{Pd}(\text{L}_{\text{pc}})(\text{L}_{\text{ref}})\text{Cl}_2$  in BN as obtained by global analysis. (d) Respective population kinetics.

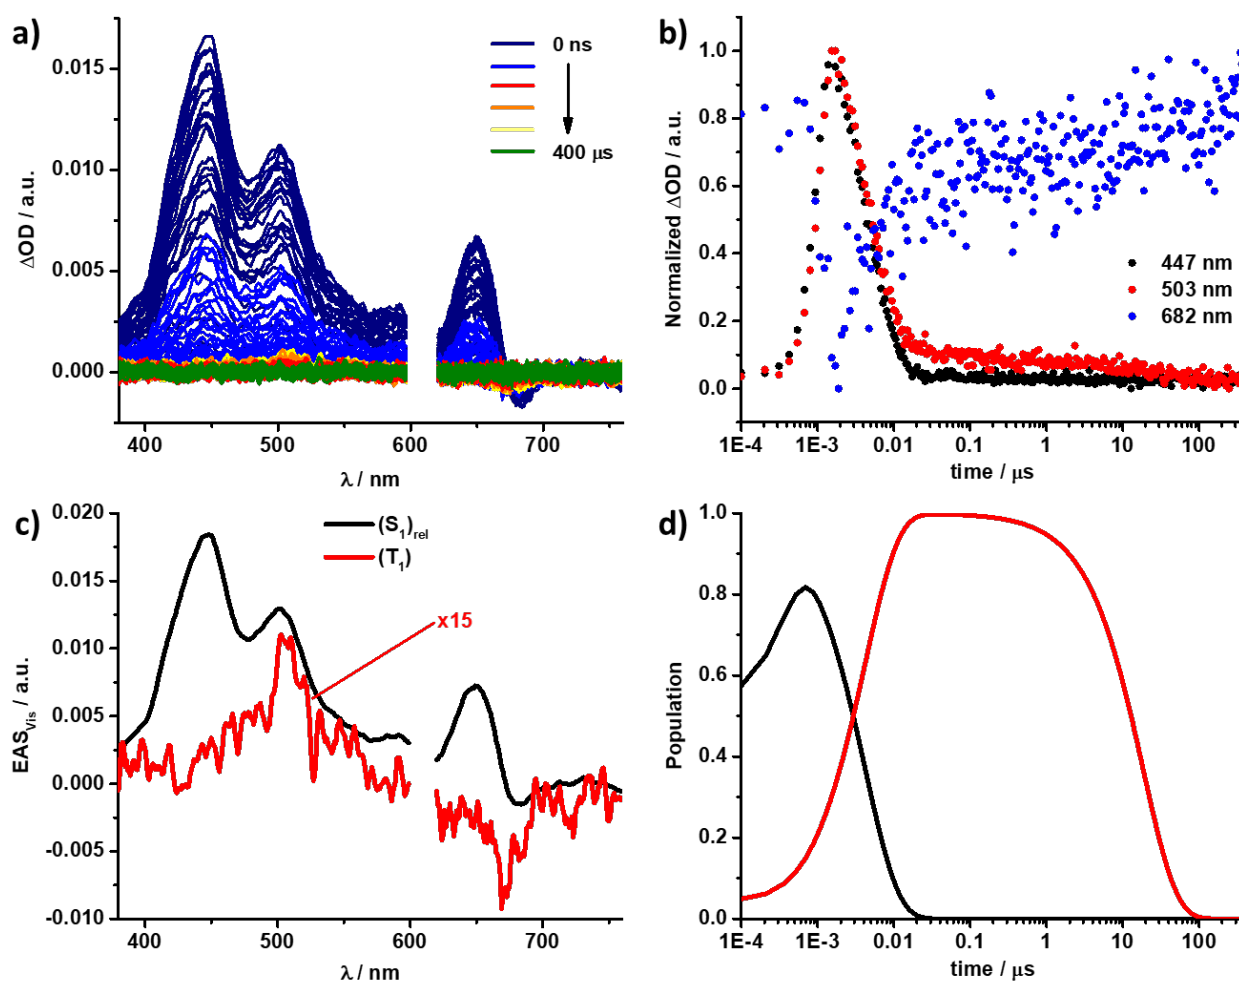

**Figure S49.** (a) nsTAS ( $\lambda_{\text{ex}} = 610 \text{ nm}$ , 400 nJ) of  $\text{Pd}(\text{L}_{\text{pc}})(\text{L}_{\text{ref}})\text{Cl}_2$  in Tol with time delays between 0 ns – 400  $\mu\text{s}$ . (b) Respective normalized time absorption profiles at the illustrated wavelengths. (c) Deconvoluted nsTAS of the solvent relaxed singlet excited state ( $(\text{S}_1)_{\text{rel}}$ ) (black) and triplet excited state ( $\text{T}_1$ ) (red) of  $\text{Pd}(\text{L}_{\text{pc}})(\text{L}_{\text{ref}})\text{Cl}_2$  in Tol as obtained by global analysis. (d) Respective population kinetics. Intensities of the NIR were too weak and are thus not shown.

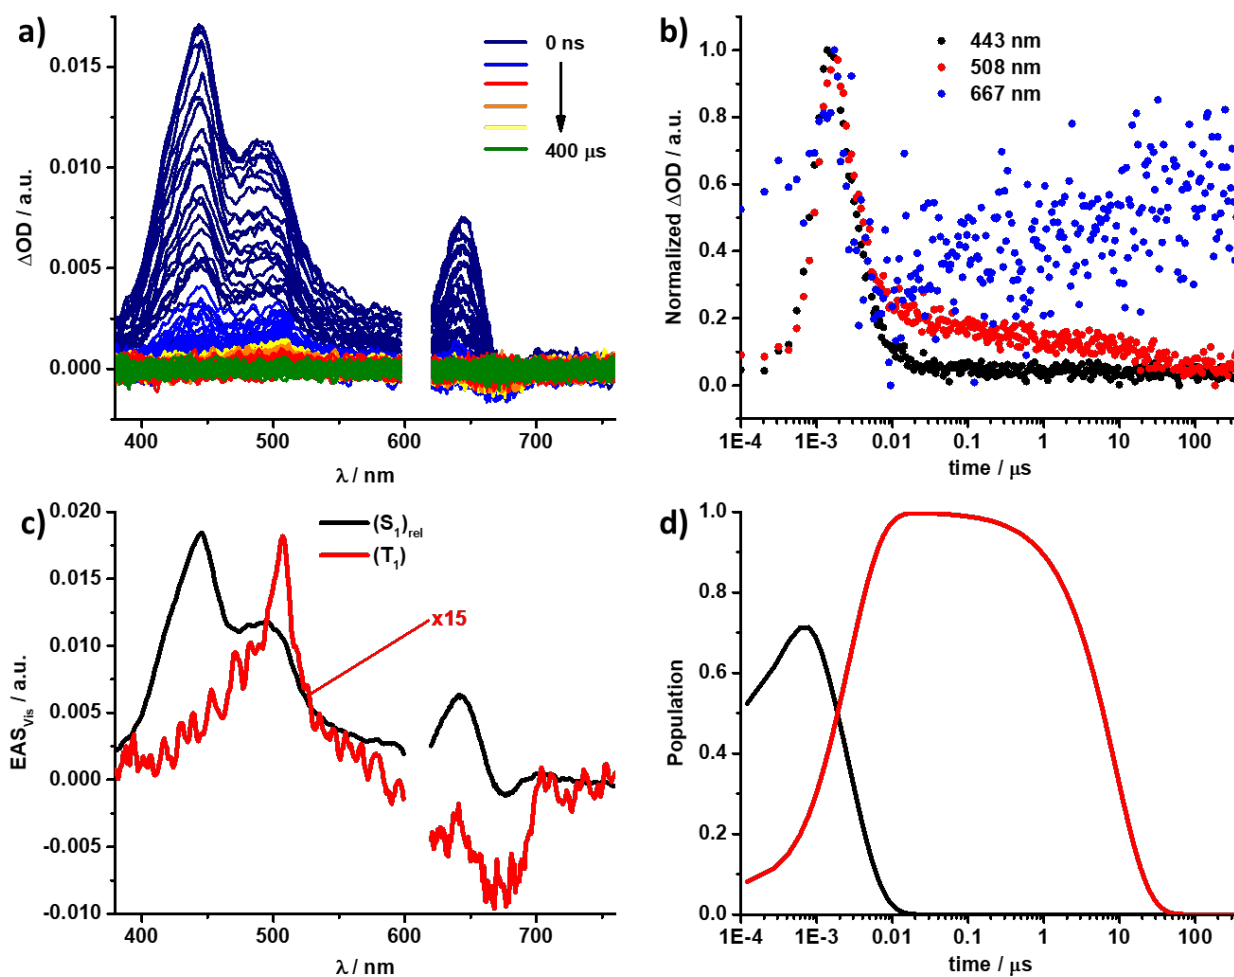

**Figure S50.** (a) nsTAS ( $\lambda_{\text{ex}} = 610 \text{ nm}$ , 400 nJ) of  $\text{Pd}(\text{L}_{\text{pc}})(\text{L}_{\text{ref}})\text{Cl}_2$  in THF with time delays between 0 ns – 400  $\mu\text{s}$ . (b) Respective normalized time absorption profiles at the illustrated wavelengths. (c) Deconvoluted nsTAS of the solvent relaxed singlet excited state  $(\text{S}_1)_{\text{rel}}$  (black) and triplet excited state  $\text{T}_1$  (red) of  $\text{Pd}(\text{L}_{\text{pc}})(\text{L}_{\text{ref}})\text{Cl}_2$  in THF as obtained by global analysis. (d) Respective population kinetics. Intensities of the NIR were too weak and are thus not shown.

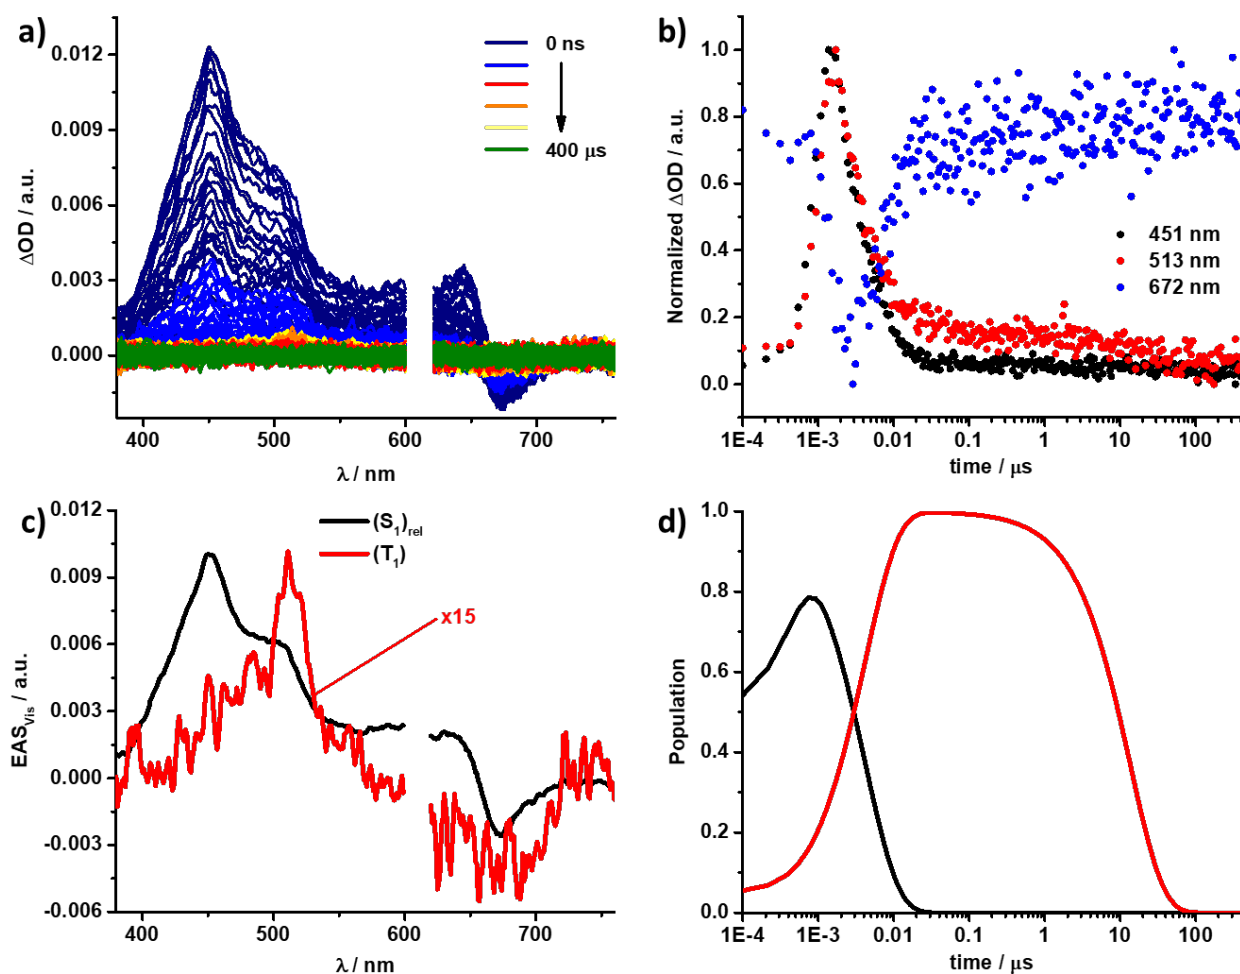

**Figure S51.** (a) nsTAS ( $\lambda_{\text{ex}} = 610 \text{ nm}$ , 400 nJ) of  $\text{Pd}(\text{L}_{\text{pc}})(\text{L}_{\text{ref}})\text{Cl}_2$  in BN with time delays between 0 ns – 400  $\mu\text{s}$ . (b) Respective normalized time absorption profiles at the illustrated wavelengths. (c) Deconvoluted nsTAS of the solvent relaxed singlet excited state ( $(\text{S}_1)_{\text{rel}}$ ) (black) and triplet excited state ( $\text{T}_1$ ) (red) of  $\text{Pd}(\text{L}_{\text{pc}})(\text{L}_{\text{ref}})\text{Cl}_2$  in BN as obtained by global analysis. (d) Respective population kinetics. Intensities of the NIR were too weak and are thus not shown.

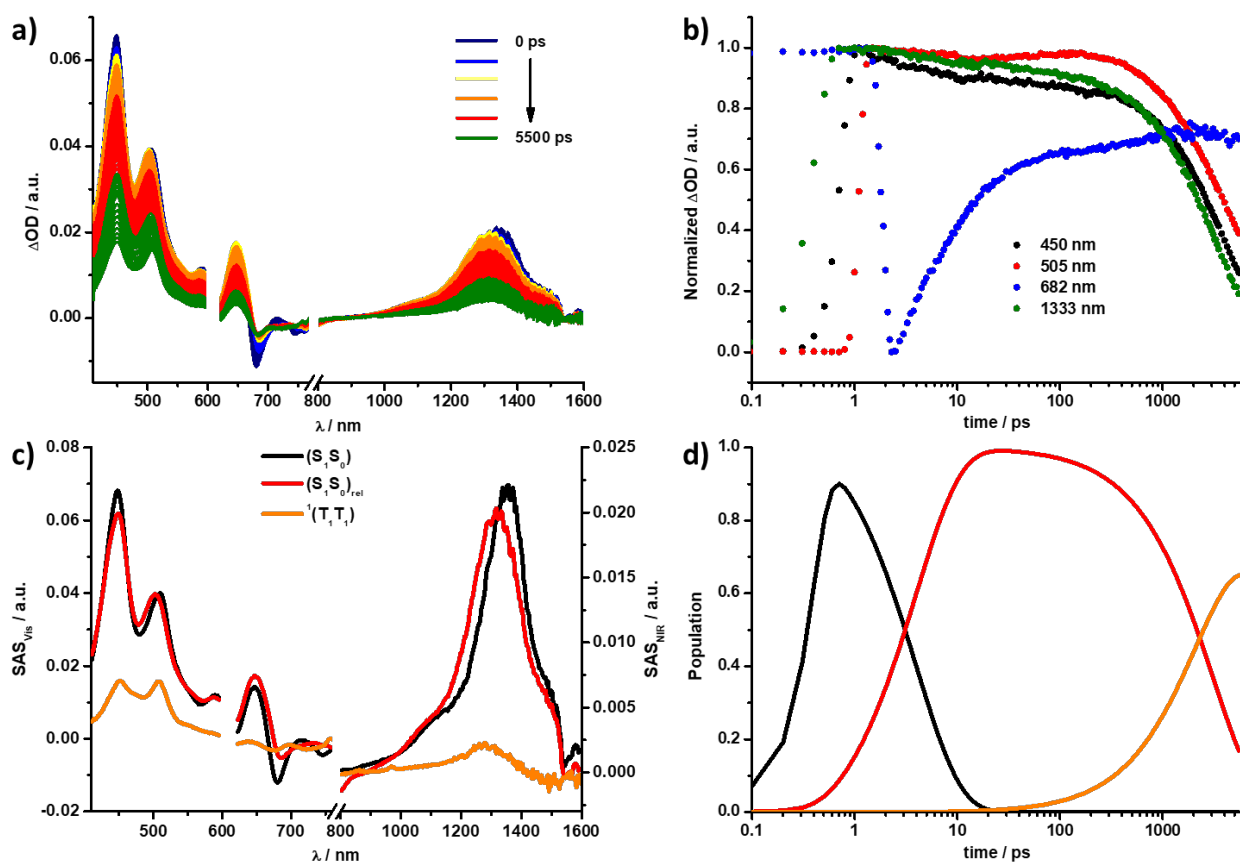

**Figure S52.** (a) fsTAS ( $\lambda_{\text{ex}} = 610$  nm, 400 nJ) of  $\text{Pd}(\text{L-pc})_2\text{Cl}_2$  in Tol with time delays between 0–5 500 ps. (b) Respective normalized time absorption profiles at the illustrated wavelengths. (c) Deconvoluted fsTAS of the singlet excited state ( $S_1S_0$ ) (black), solvent relaxed singlet excited state ( $(S_1S_0)_{\text{rel}}$ ) (red), and singlet correlated triplet pair  ${}^1(T_1T_1)$  (orange) of  $\text{Pd}(\text{L-pc})_2\text{Cl}_2$  in Tol as obtained by target analysis. (d) Respective population kinetics.

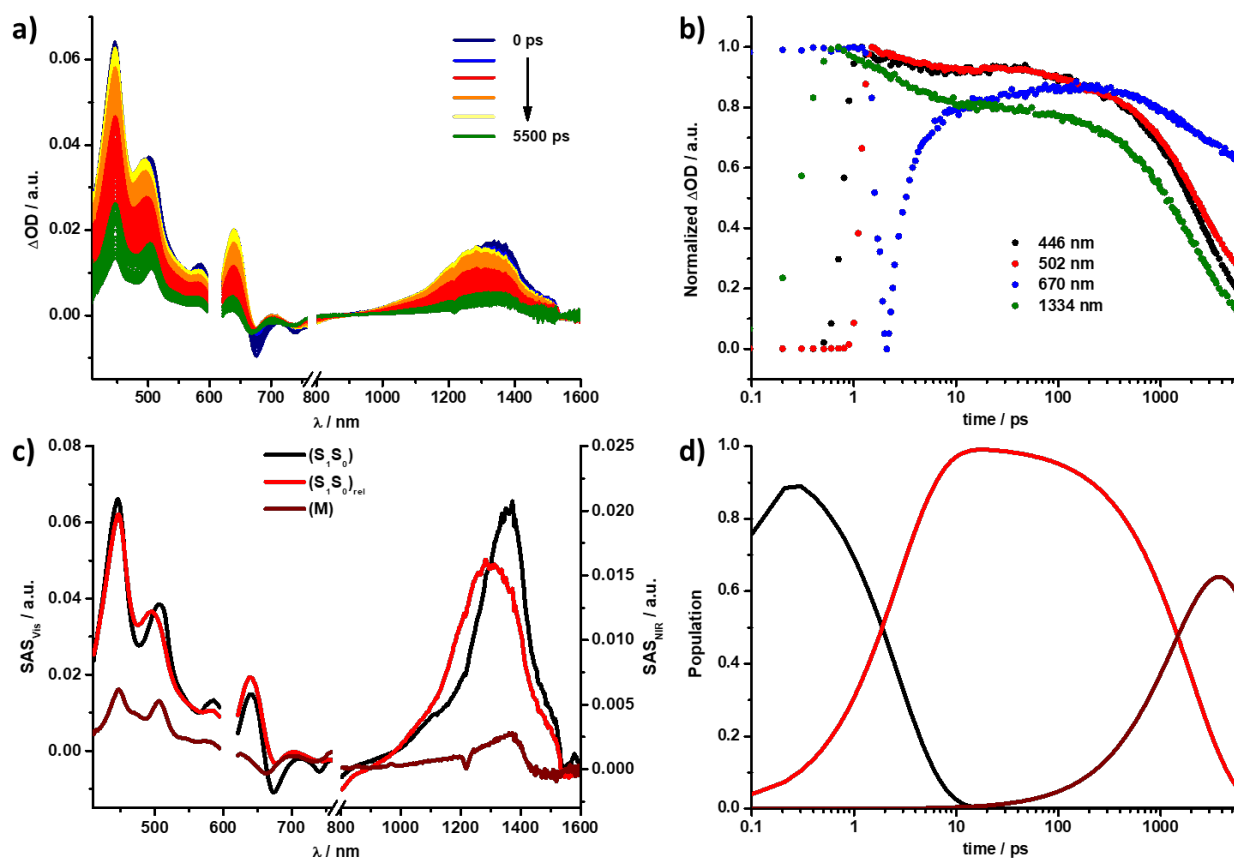

**Figure S53.** (a) fsTAS ( $\lambda_{\text{ex}} = 610$  nm, 400 nJ) of  $\text{Pd}(\text{L}_{\text{pc}})_2\text{Cl}_2$  in THF with time delays between 0–5 500 ps. (b) Respective normalized time absorption profiles at the illustrated wavelengths. (c) Deconvoluted fsTAS of the singlet excited state ( $S_1S_0$ ) (black), solvent relaxed singlet excited state ( $(S_1S_0)_{\text{rel}}$ ) (red), and mixed singlet / triplet / charge transfer intermediate state (M) (brown) of  $\text{Pd}(\text{L}_{\text{pc}})_2\text{Cl}_2$  in THF as obtained by target analysis. (d) Respective population kinetics.

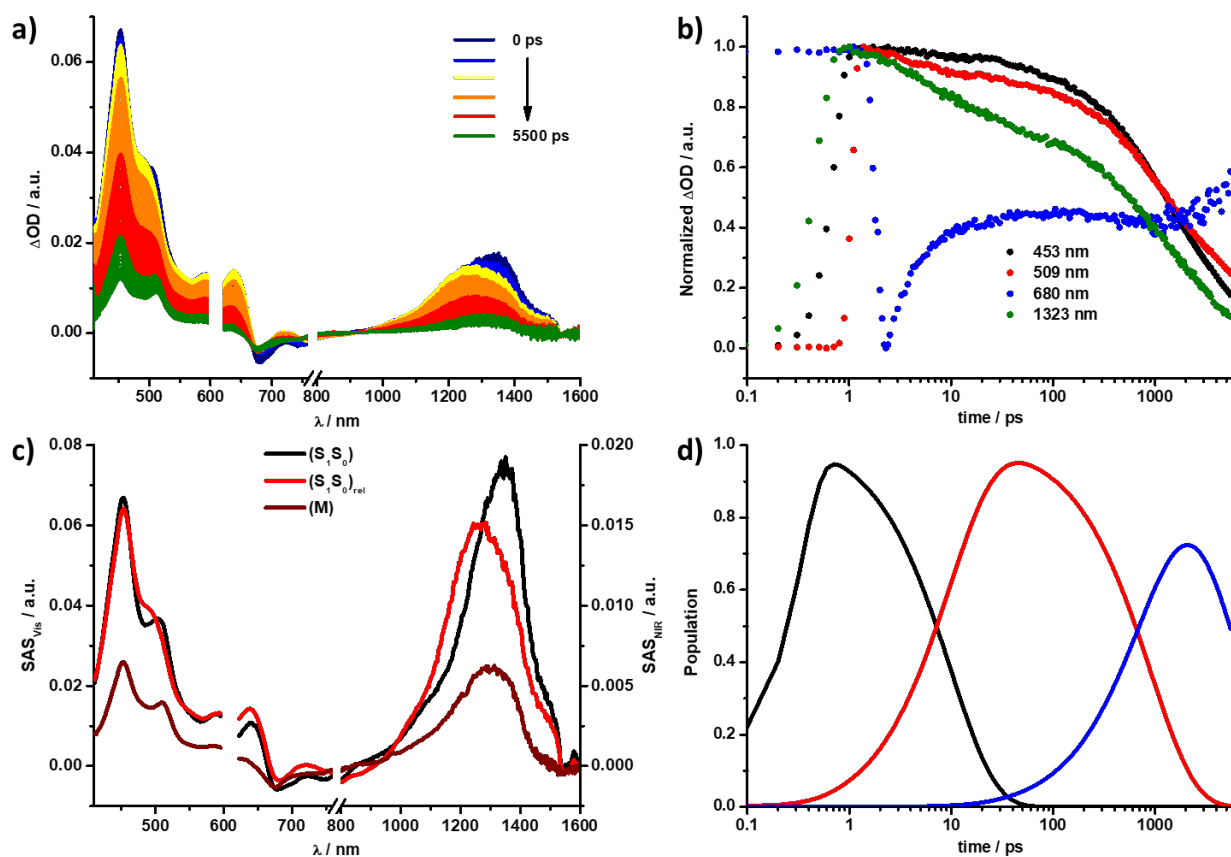

**Figure S54.** (a) fsTAS ( $\lambda_{\text{ex}} = 610 \text{ nm}$ , 400 nJ) of  $\text{Pd}(\text{L}_{\text{pc}})_2\text{Cl}_2$  in BN with time delays between 0–5 500 ps. (b) Respective normalized time absorption profiles at the illustrated wavelengths. (c) Deconvoluted fsTAS of the singlet excited state ( $\text{S}_1\text{S}_0$ ) (black), solvent relaxed singlet excited state  $(\text{S}_1\text{S}_0)_{\text{rel}}$  (red), and mixed singlet / triplet / charge transfer intermediate state (M) (brown) of  $\text{Pd}(\text{L}_{\text{pc}})_2\text{Cl}_2$  in BN as obtained by target analysis. (d) Respective population kinetics.



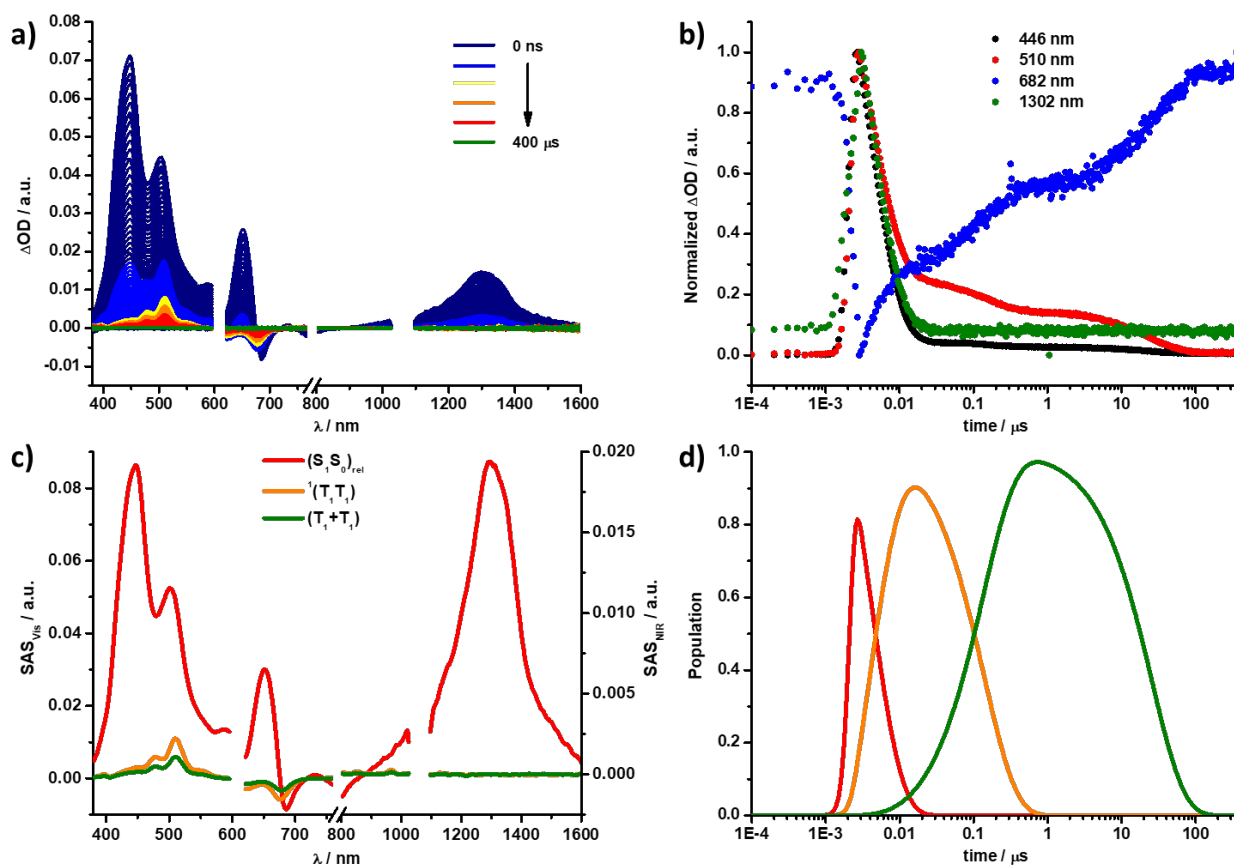

**Figure S55.** (a) nsTAS ( $\lambda_{\text{ex}} = 610 \text{ nm}$ , 400 nJ) of  $\text{Pd}(\text{Lpc})_2\text{Cl}_2$  in Tol with time delays between 0 ns – 400  $\mu\text{s}$ . (b) Respective normalized time absorption profiles at the illustrated wavelengths. (c) Deconvoluted nsTAS of the solvent relaxed singlet excited state  $(\text{S}_1\text{S}_0)_{\text{rel}}$  (red), singlet correlated triplet pair  ${}^1(\text{T}_1\text{T}_1)$  (orange), and uncorrelated triplet excited states  $(\text{T}_1+\text{T}_1)$  (green) of  $\text{Pd}(\text{Lpc})_2\text{Cl}_2$  in Tol as obtained by target analysis. (d) Respective population kinetics.

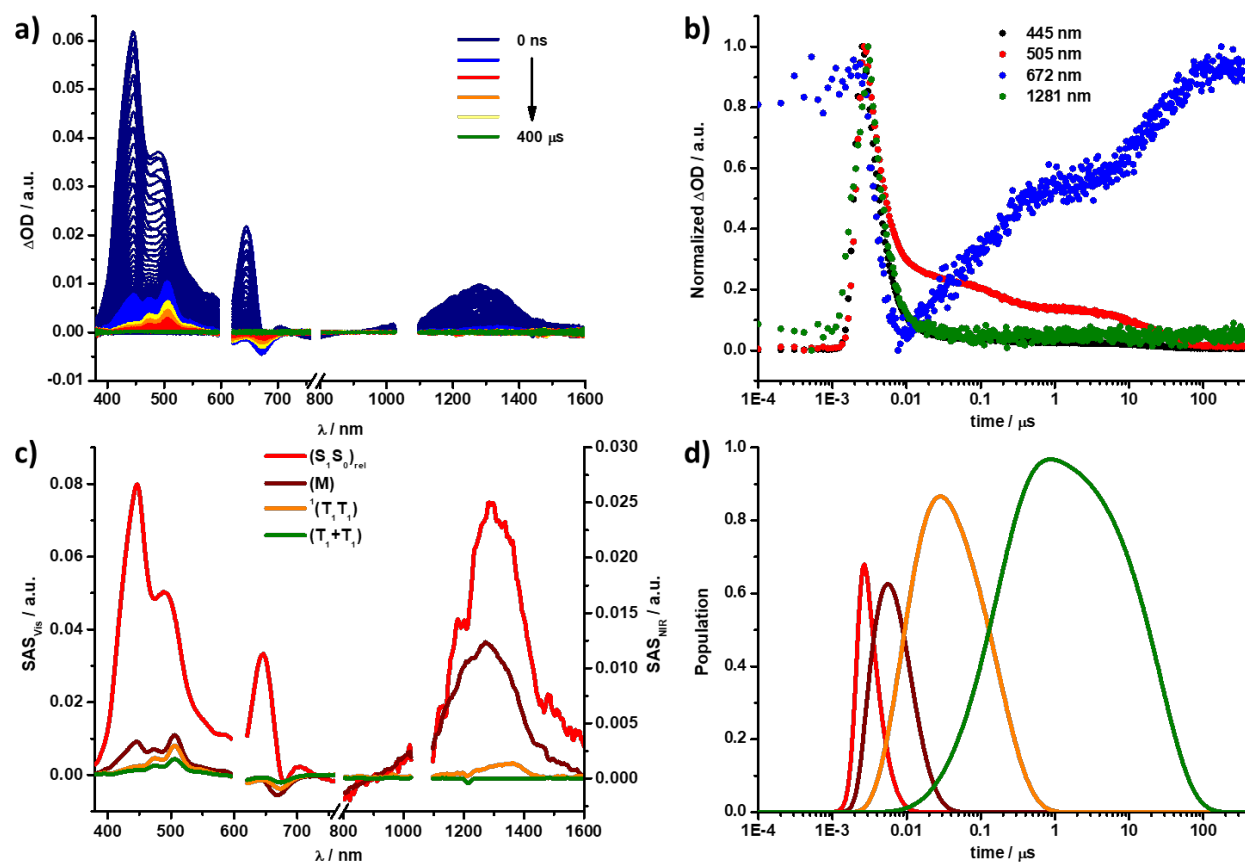

**Figure S56.** (a) nsTAS ( $\lambda_{\text{ex}} = 610 \text{ nm}$ , 400 nJ) of  $\text{Pd}(\text{L}_{\text{pc}})_2\text{Cl}_2$  in THF with time delays between 0 ns – 400  $\mu\text{s}$ . (b) Respective normalized time absorption profiles at the illustrated wavelengths. (c) Deconvoluted nsTAS of the solvent relaxed singlet excited state  $(\text{S}_1\text{S}_0)_{\text{rel}}$  (red), mixed singlet / triplet / charge transfer intermediate state (M) (brown), singlet correlated triplet pair  $^1(\text{T}_1\text{T}_1)$  (orange), and uncorrelated triplet excited states  $(\text{T}_1+\text{T}_1)$  (green) of  $\text{Pd}(\text{L}_{\text{pc}})_2\text{Cl}_2$  in THF as obtained by target analysis. (d) Respective population kinetics.

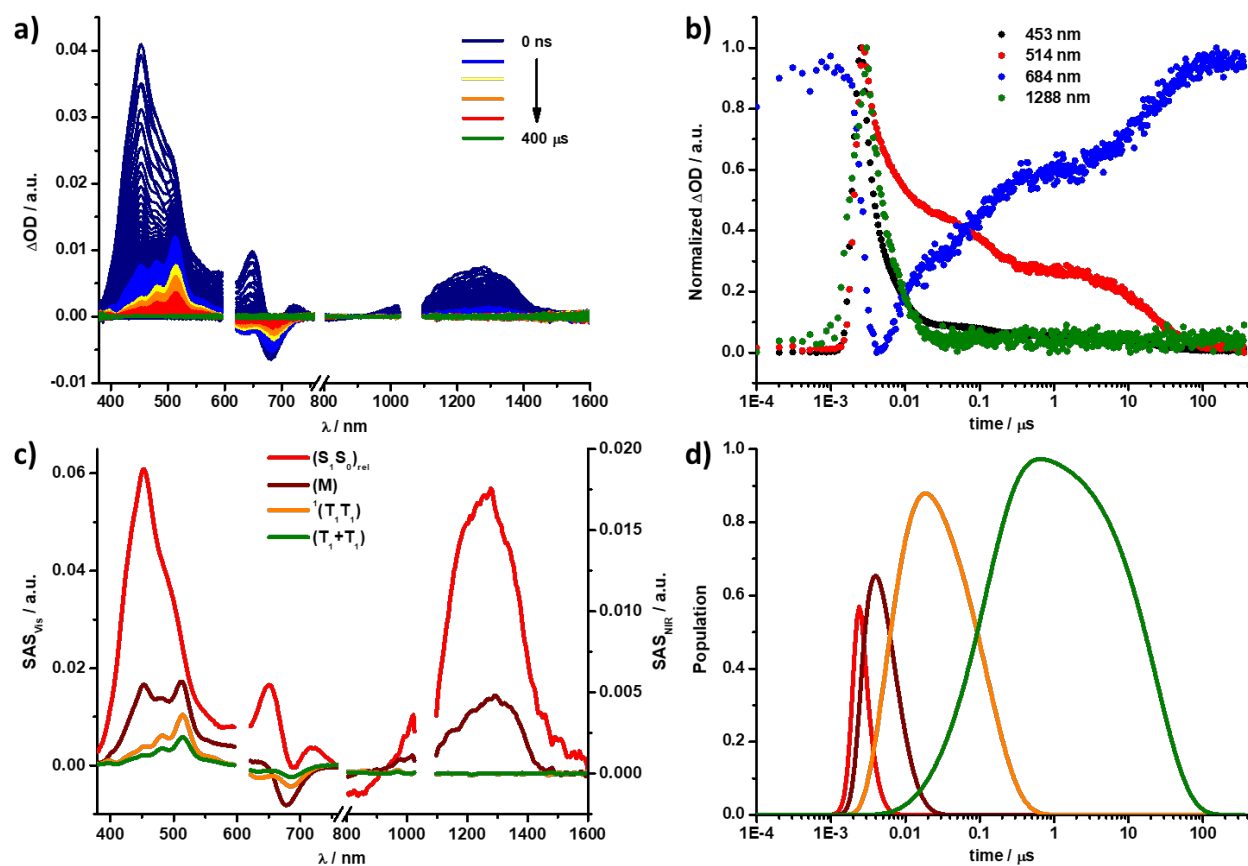

**Figure S57.** (a) nsTAS ( $\lambda_{\text{ex}} = 610 \text{ nm}$ , 400 nJ) of  $\text{Pd}(\text{Lpc})_2\text{Cl}_2$  in BN with time delays between 0 ns – 400  $\mu\text{s}$ . (b) Respective normalized time absorption profiles at the illustrated wavelengths. (c) Deconvoluted nsTAS of the solvent relaxed singlet excited state  $(\text{S}_1\text{S}_0)_{\text{rel}}$  (red), mixed singlet / triplet / charge transfer intermediate state (M) (brown), singlet correlated triplet pair  $^1(\text{T}_1\text{T}_1)$  (orange), and uncorrelated triplet excited states  $(\text{T}_1+\text{T}_1)$  (green) of  $\text{Pd}(\text{Lpc})_2\text{Cl}_2$  in BN as obtained by target analysis. (d) Respective population kinetics.

## Supplementary Reference

1. Hou, Y.; Papadopoulos, I.; Ferguson, M. J.; Jax, N.; Tykwinski, R. R.; Guldi, D. M. Photophysical Characterization of a Ruthenium-based Tetrameric Pentacene Complex. *J. Porphyrins Phthalocyanines* **2023**, *27*, 686–693; <https://doi.org/10.1142/S1088424623500645>
2. Imperiale, C. J.; Green, P. B.; Miller, E. G.; Damrauer, N. H.; Wilson, M. W. B. Triplet-Fusion Upconversion Using a Rigid Tetracene Homodimer. *J. Phys. Chem. Lett.* **2019**, *10*, 7463–7469; <https://doi.org/10.1021/acs.jpcclett.9b03115>.
3. Wu, L. P.; Suenaga, Y.; Kuroda-Sowa, T.; Maekawa, M.; Furuichi, K.; Munakata, M. Syntheses, Structures and Properties of Palladium (II) Complexes with Photochromic 4-Methoxyazobenzene. *Inorganica Chim. Acta* **1996**, *248*, 147–152; [https://doi.org/10.1016/0020-1693\(95\)04995-9](https://doi.org/10.1016/0020-1693(95)04995-9).
